# Supplementary material for: [3+2] Cycloaddition mediated synthesis of spirooxindole pyrrolidine/piperidine fused chromene aldehyde derivatives: DFT studies, antibacterial evaluation and molecular docking investigation as DNA gyrase inhibitors
Source: Royal Society of Chemistry journal article supplement (doi:10.1039/d4nj01102c), 2024-01-01
Supplement: d4nj01102c1.pdf [file d4nj01102c1.pdf]

## Supporting information

### [3+2] Cycloaddition mediated synthesis of Spirooxindole Pyrrolidine/Piperidine Fused Chromene Aldehyde Derivatives: DFT Studies, Antibacterial Evaluation and Molecular Docking Investigation as DNA gyrase inhibitors

Jasmine Panda<sup>1</sup>, Bishnu Prasad Raiguru<sup>1</sup>, Sabita Nayak<sup>1\*</sup>, Suhasini Mohapatra<sup>1</sup>, Seetaram Mohapatra<sup>1</sup>, Saiprakash Rout<sup>2,3</sup>, Pranay Mohanty<sup>2,3</sup>, Himansu Sekhar Biswal<sup>2,3</sup>, Debdutta Bhattacharya<sup>4</sup>, Chita Ranjan Sahoo<sup>4</sup>

<sup>1</sup>*Organic Synthesis Laboratory, Department of Chemistry, Ravenshaw University, Cuttack-753003, Odisha, India*

<sup>2</sup>*School of Chemical Sciences, National Institute of Science Education and Research (NISER), PO- Bimpur-Padanpur, Via-Jatni, Dt-Khurda-752050, Bhubaneswar, Odisha, India*

<sup>3</sup>*Homi Bhabha National Institute, Training School Complex, Anushakti Nagar, Mumbai-400094, India*

<sup>4</sup>*ICMR-Regional Medical Research Centre, Department of Health Research, Ministry of Health & Family Welfare, Govt. of India, Bhubaneswar-751023, Odisha, India*

\*Corresponding Author

Email: [sabitanayak18@gmail.com](mailto:sabitanayak18@gmail.com)

### Contents

1. **Fig S1-S57:** <sup>1</sup>H, <sup>13</sup>C NMR and HRMS spectra of synthesized compounds **16(a-k)**, **16'(a-f)** and **17**
2. **Fig S58-S60:** <sup>1</sup>H, <sup>13</sup>C NMR and HRMS spectra of synthesized compound **18d**
3. Co-ordinates of the optimized geometries of all the species
4. **Fig S61-S77:** Molecular docking studies of **16(a-k)** and **16'(a-f)** derivatives with *E. coli* DNA gyrase (PDB ID: 1KZN)
5. **Fig S78-S94:** Molecular docking studies of **16(a-k)** and **16'(a-f)** derivatives with *S. aureus* DNA gyrase (PDB ID: 3G7B)
6. **Fig S95-S103:** Bioavailability radar plots of Ciprofloxacin and **16(a-k)** and **16'(a-f)** derivatives

1.  $^1\text{H}$ ,  $^{13}\text{C}$  NMR and HRMS spectra of synthesized compounds **16(a-k)**, **16'(a-f)** and **17**

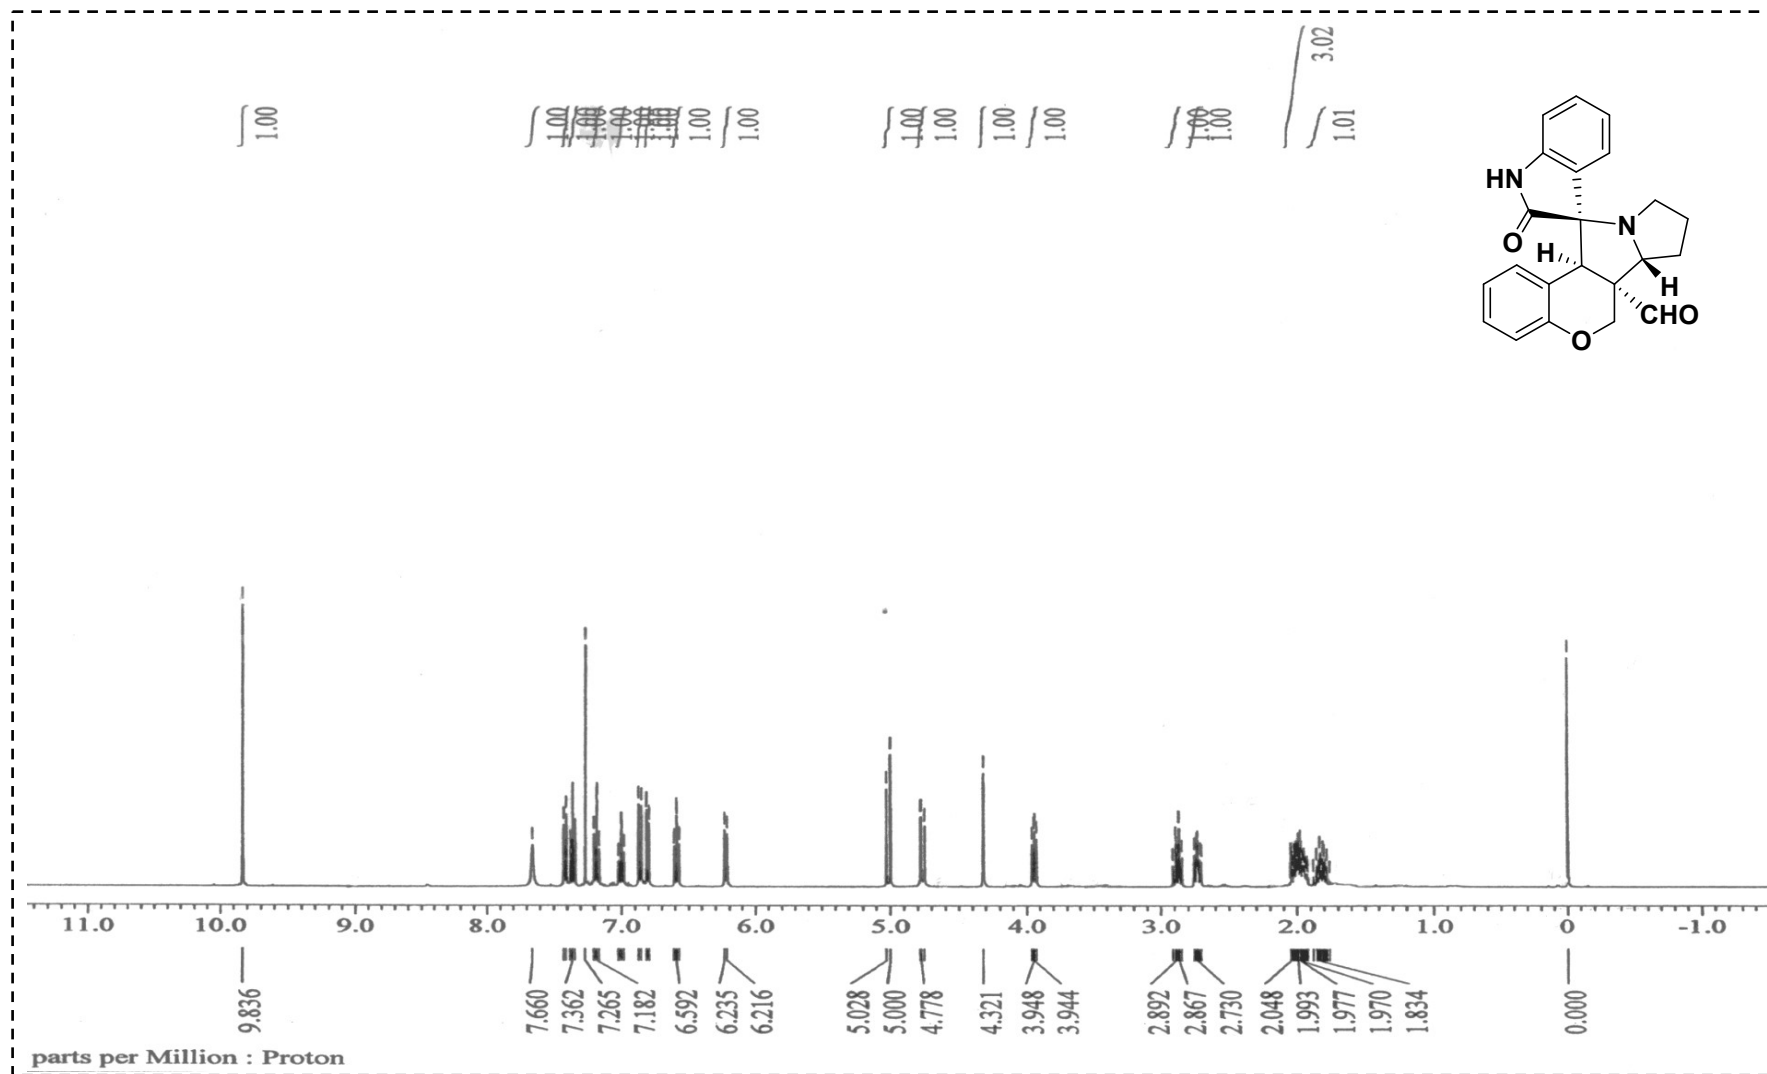

Fig S1.  $^1\text{H}$  NMR spectrum of compound **16a** in  $\text{CDCl}_3$

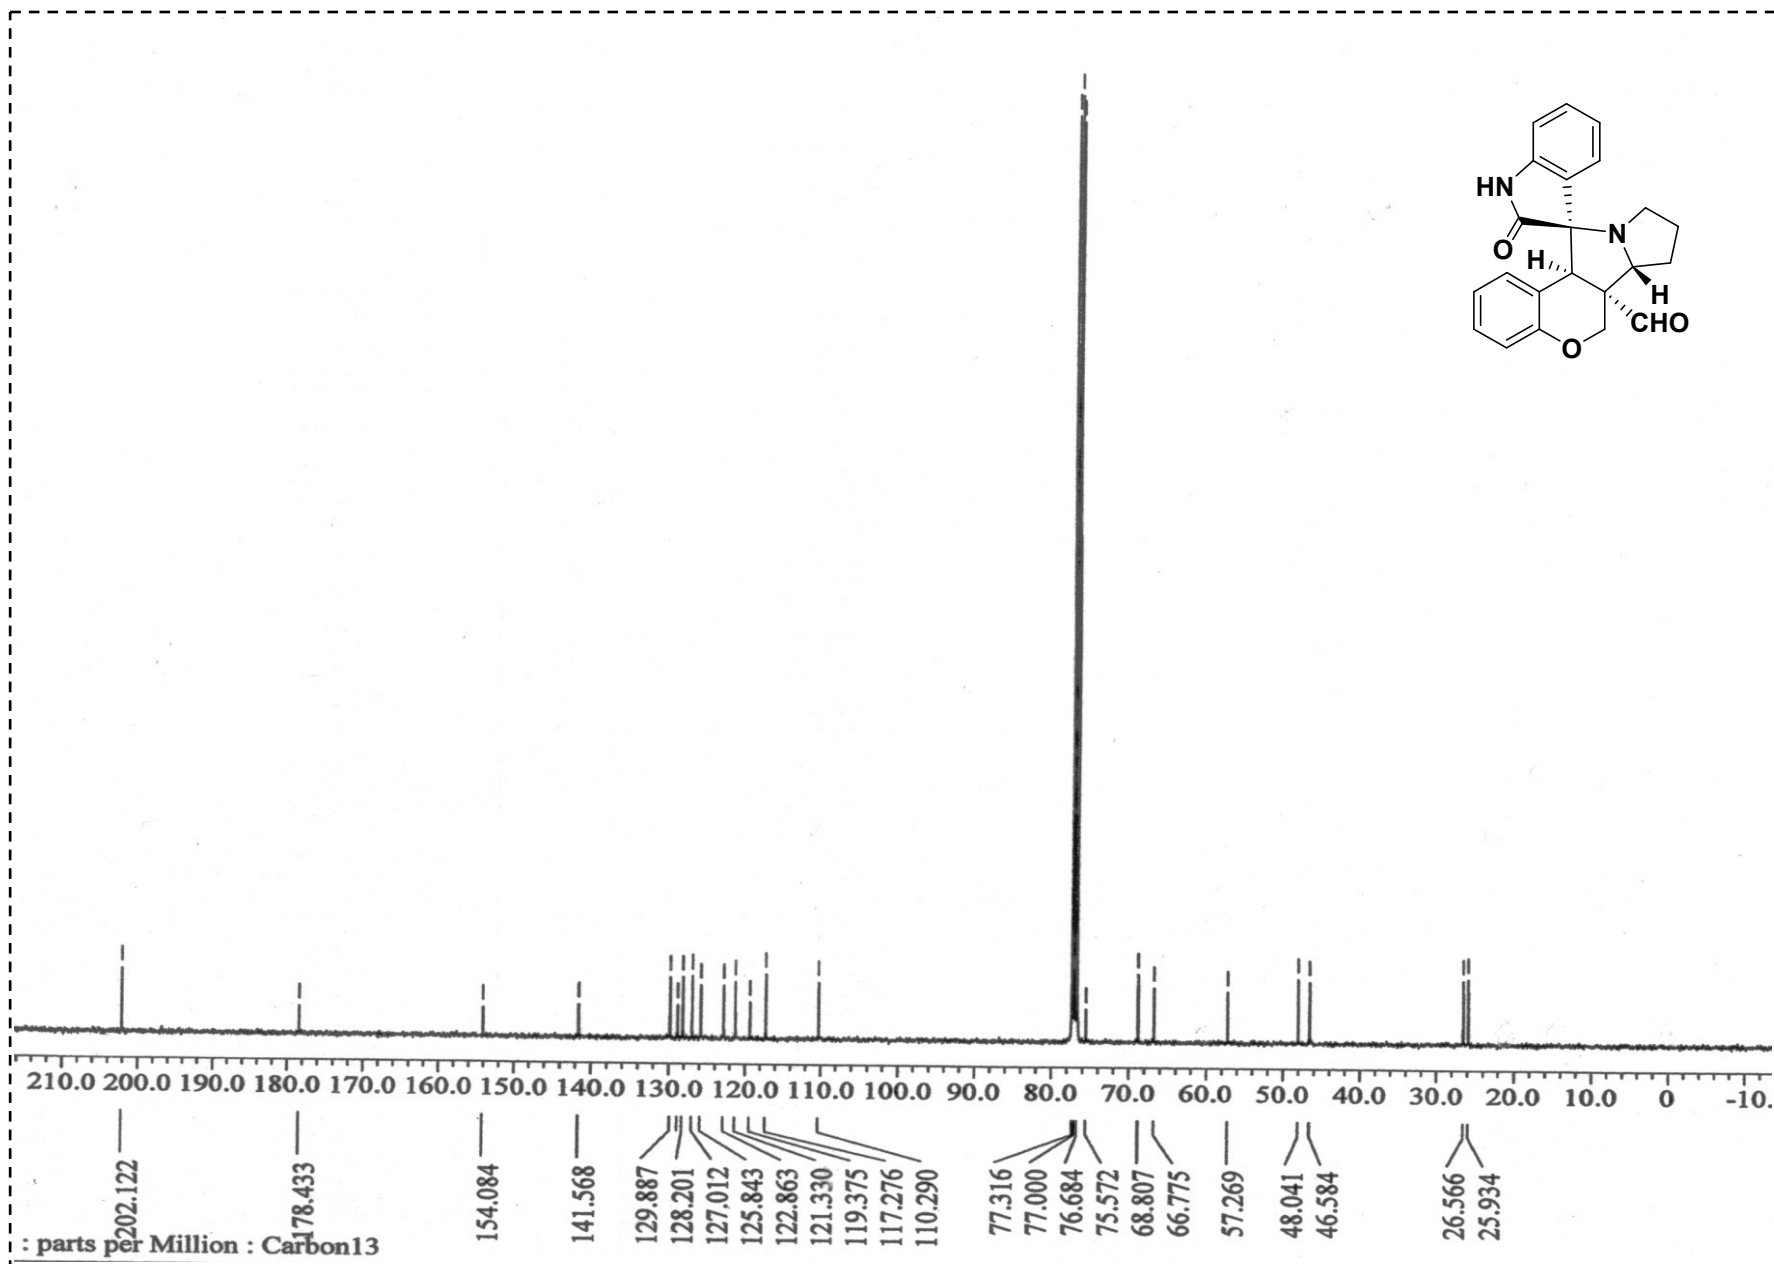

Fig S2.  $^{13}\text{C}$  NMR spectrum of compound **16a** in  $\text{CDCl}_3$

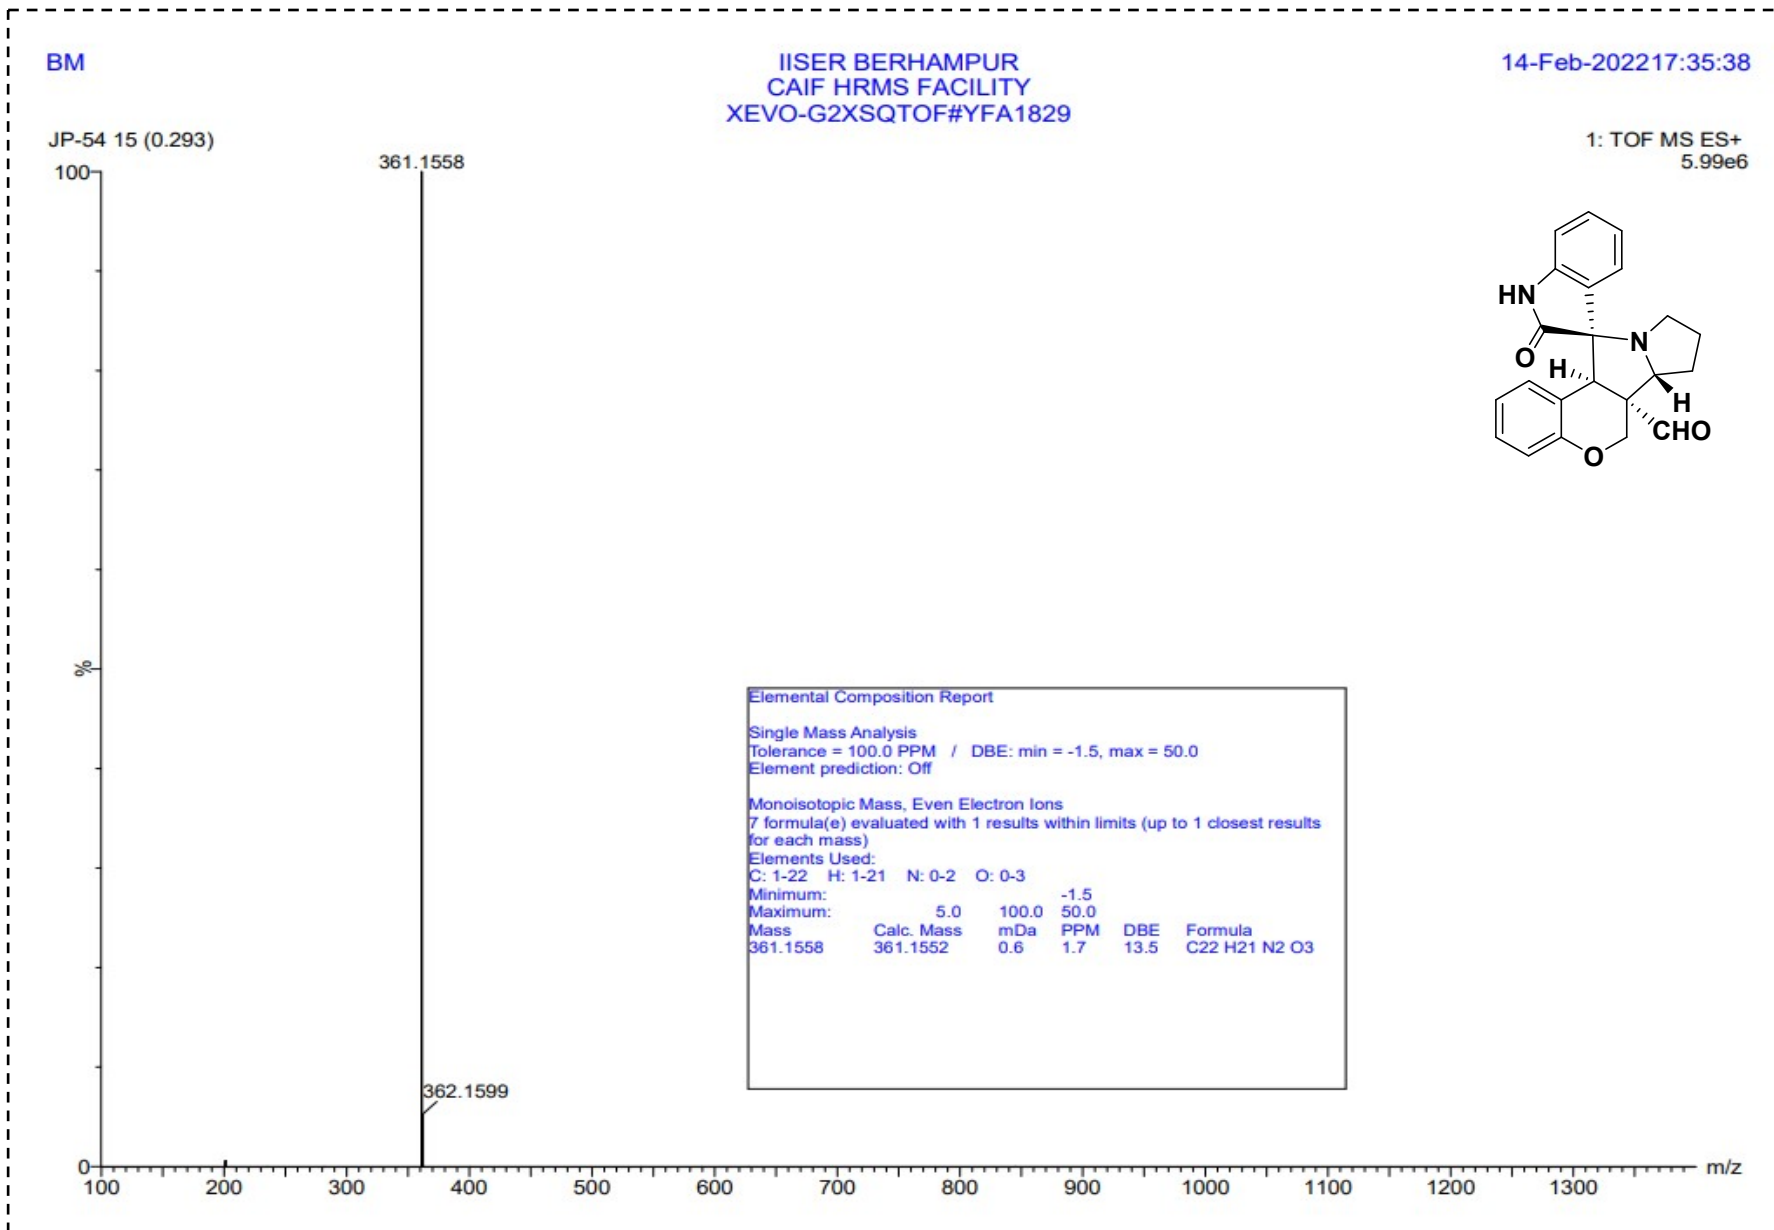

Fig S3. HRMS of compound 16a

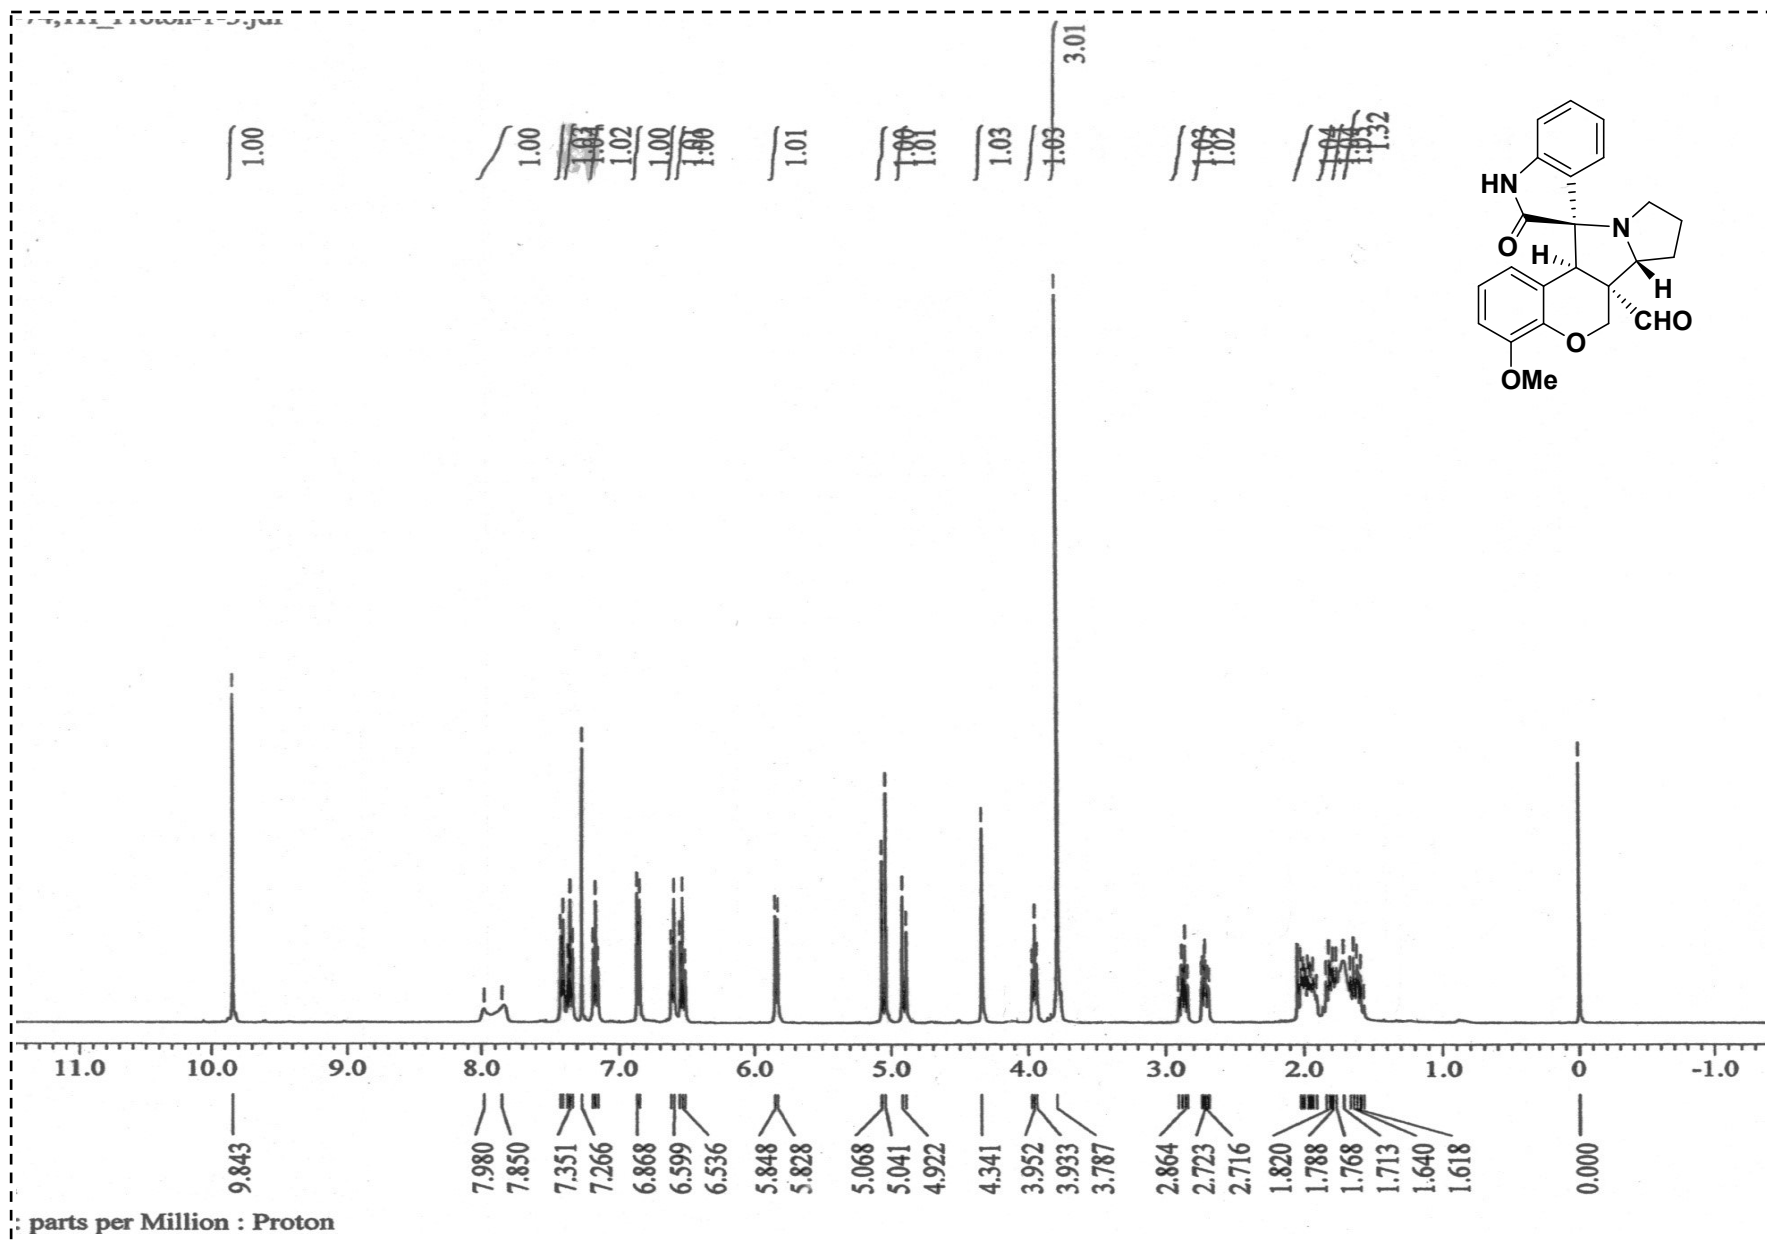

Fig S4.  $^1\text{H}$  NMR spectrum of compound **16b** in  $\text{CDCl}_3$

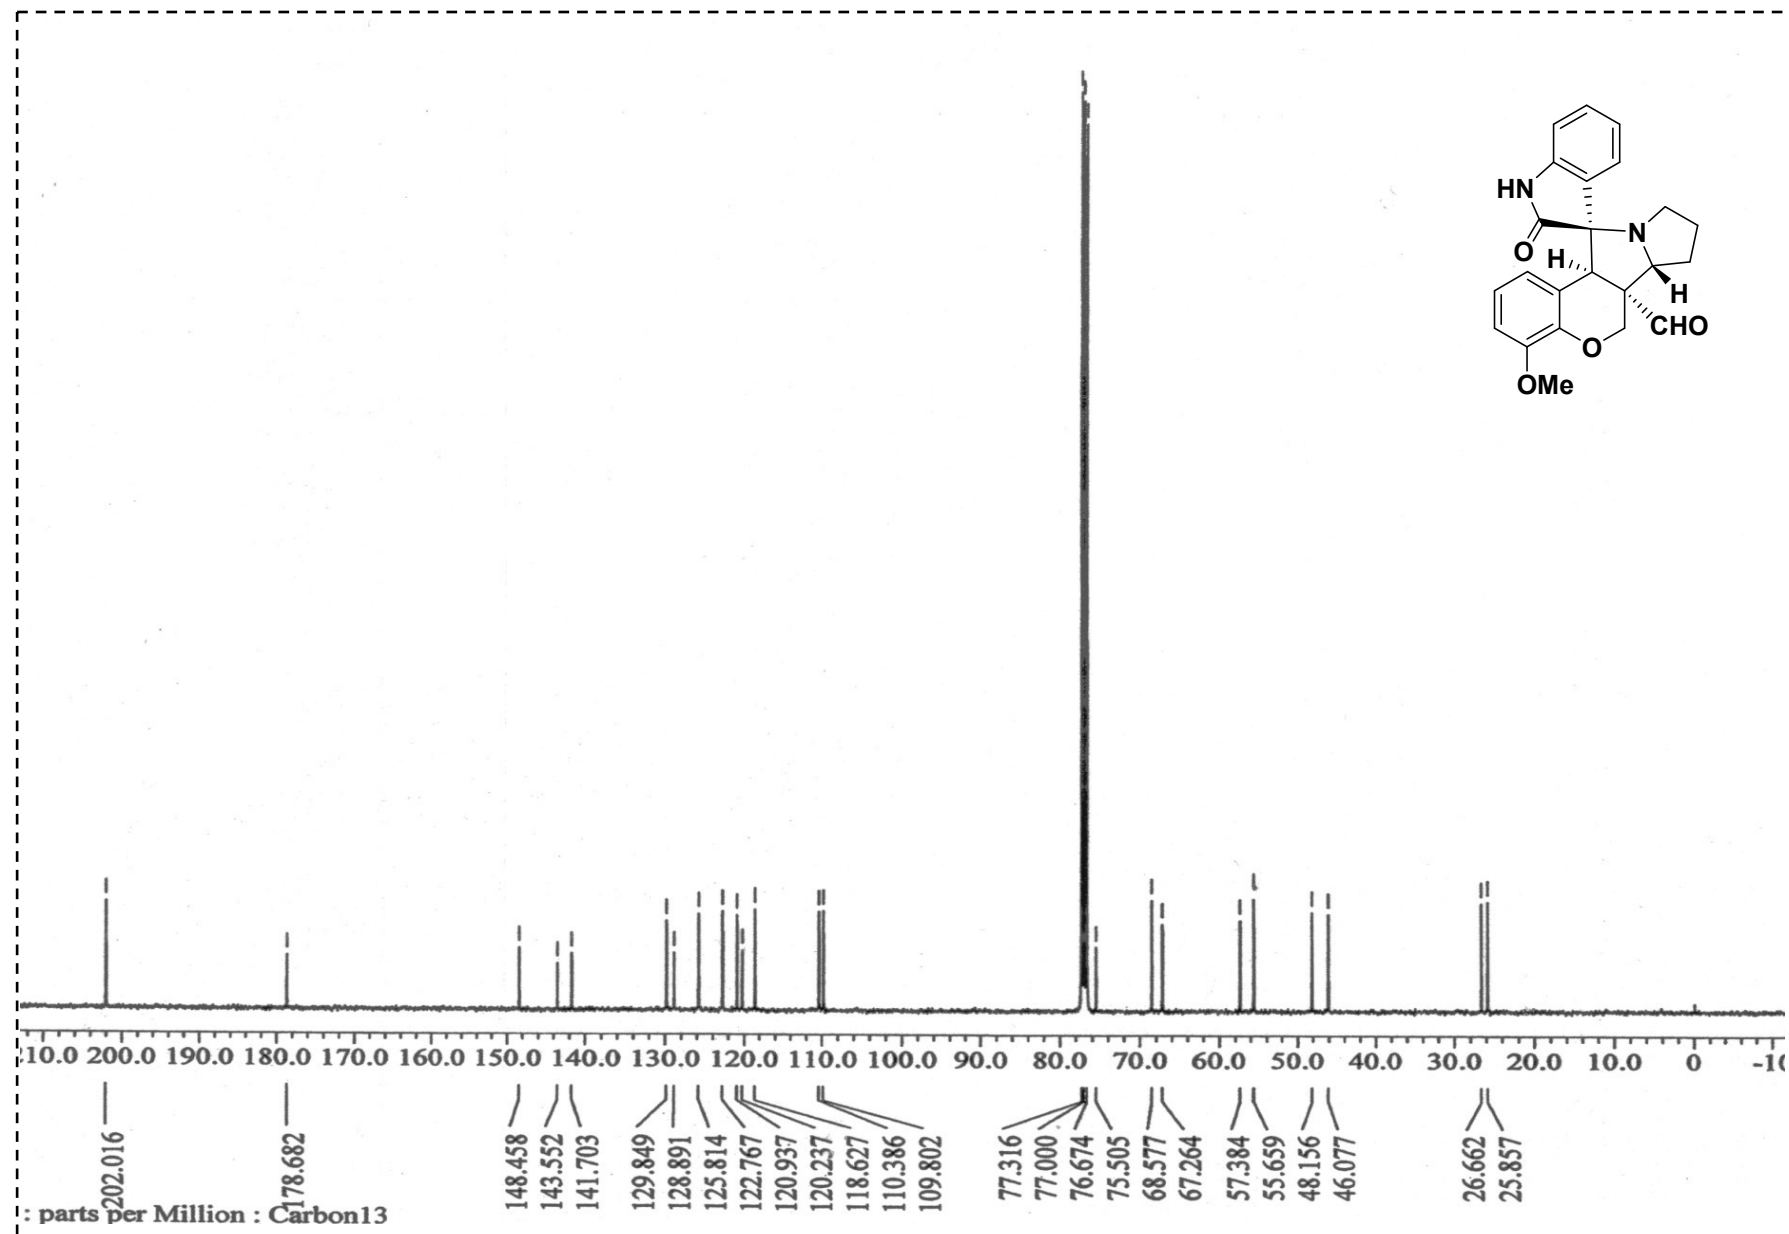

Fig S5. <sup>13</sup>C NMR spectrum of compound **16b** in CDCl<sub>3</sub>

BM

IISER BERHAMPUR  
CAIF HRMS FACILITY  
XEVO-G2XSQTOF#YFA1829

15-Feb-2022 10:08:10

JP-74 10 (0.209) Cm (9:10)

1: TOF MS ES+  
1.36e7

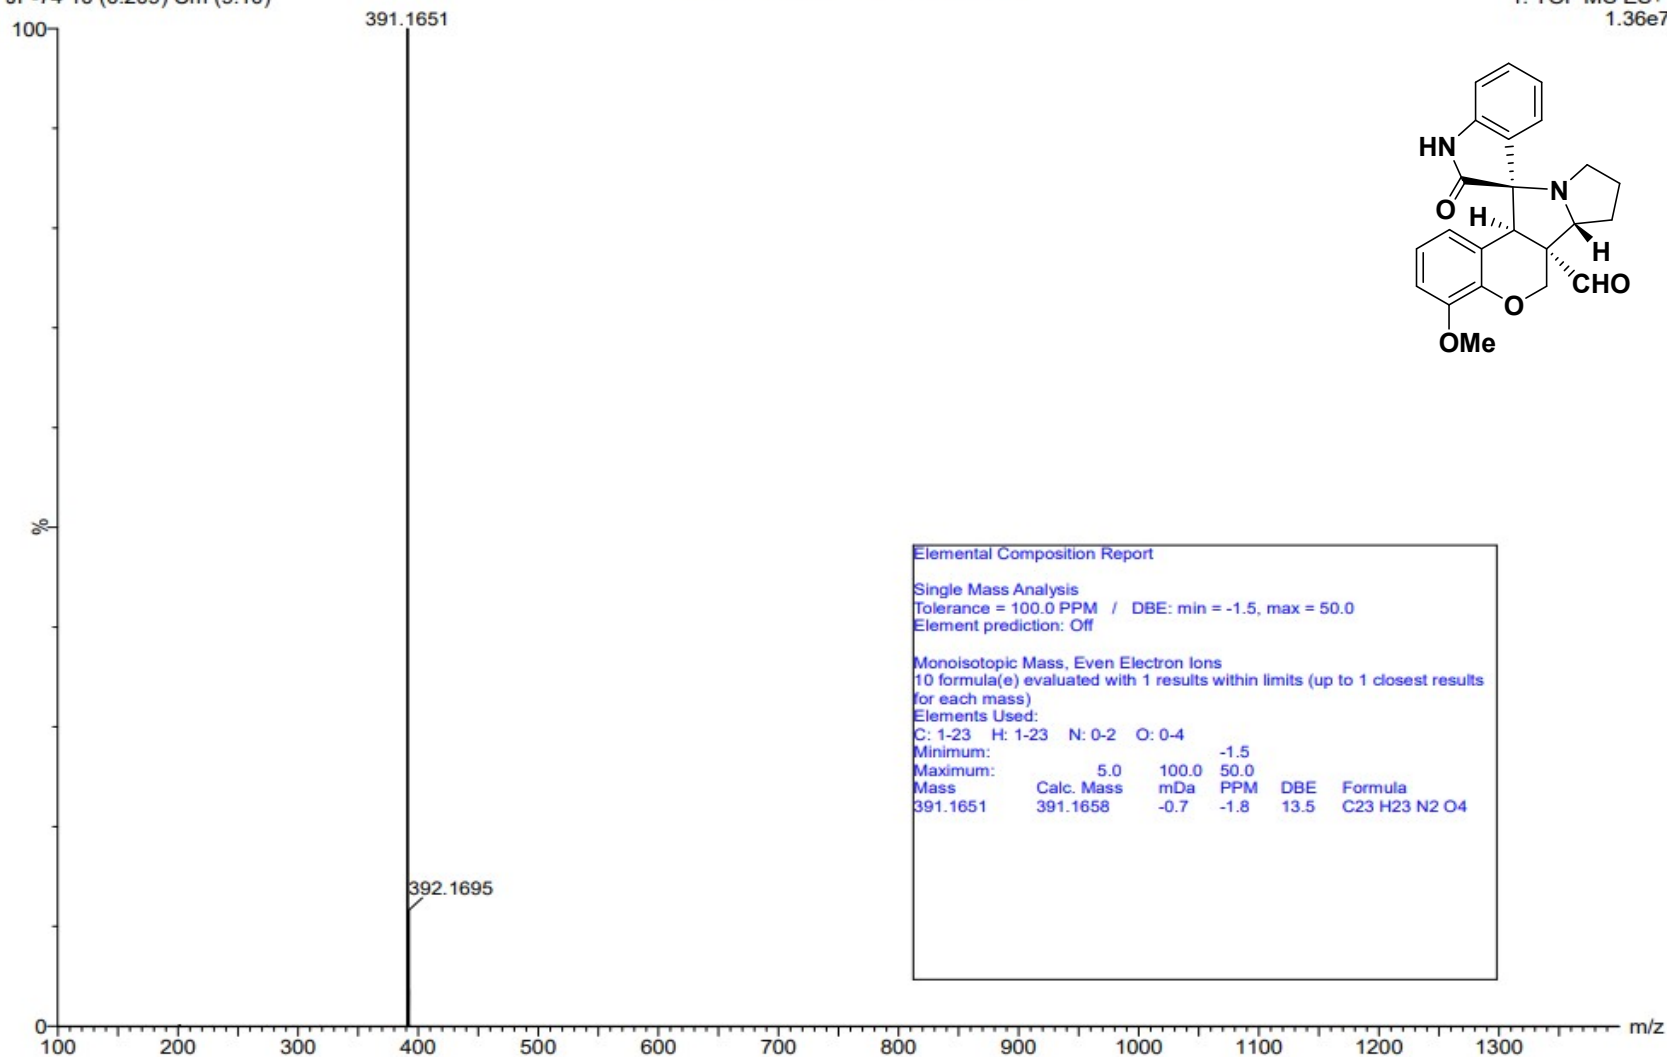

Fig S6. HRMS of compound 16b

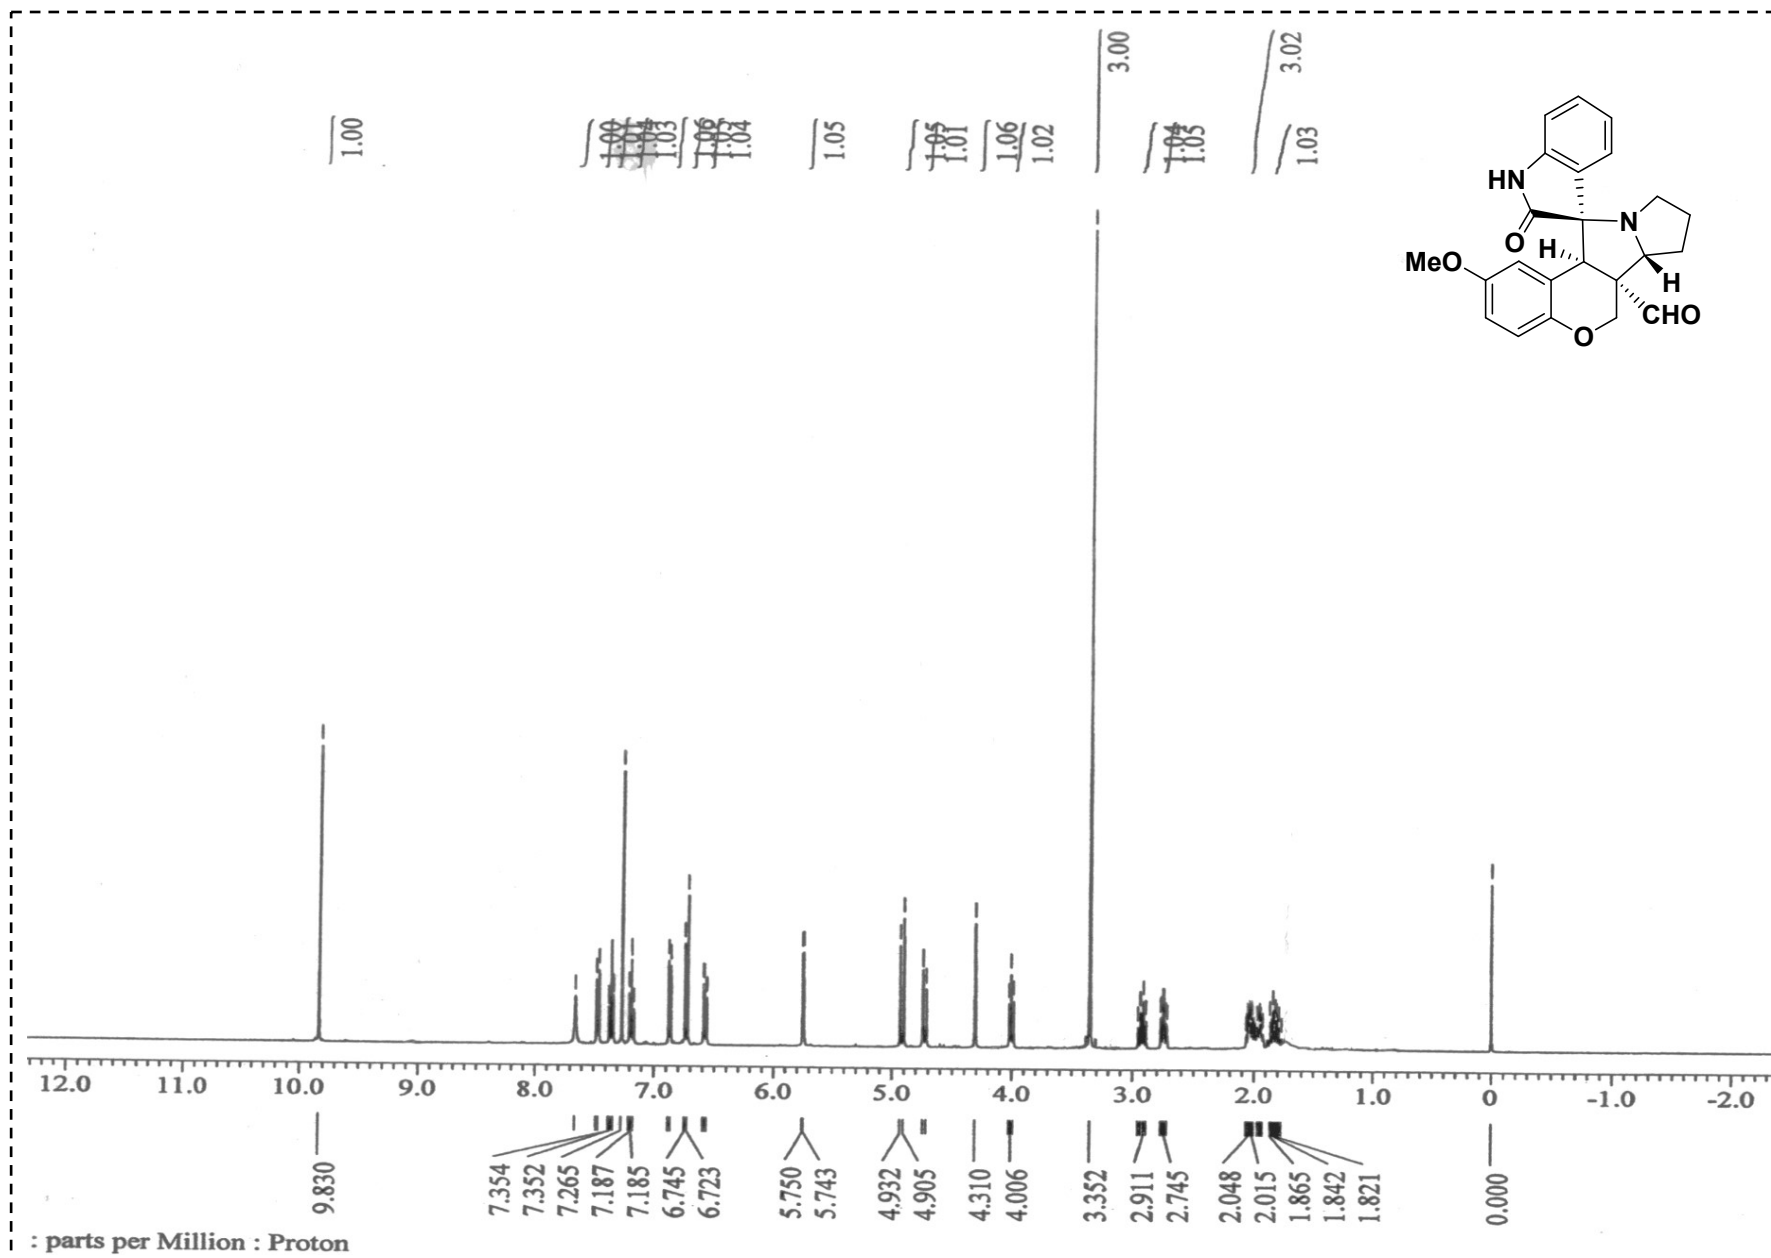

Fig S7. <sup>1</sup>H NMR spectrum of compound 16c in CDCl<sub>3</sub>



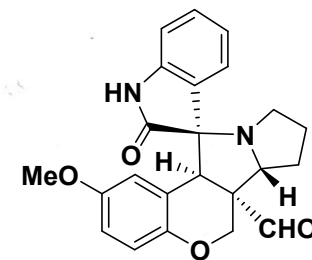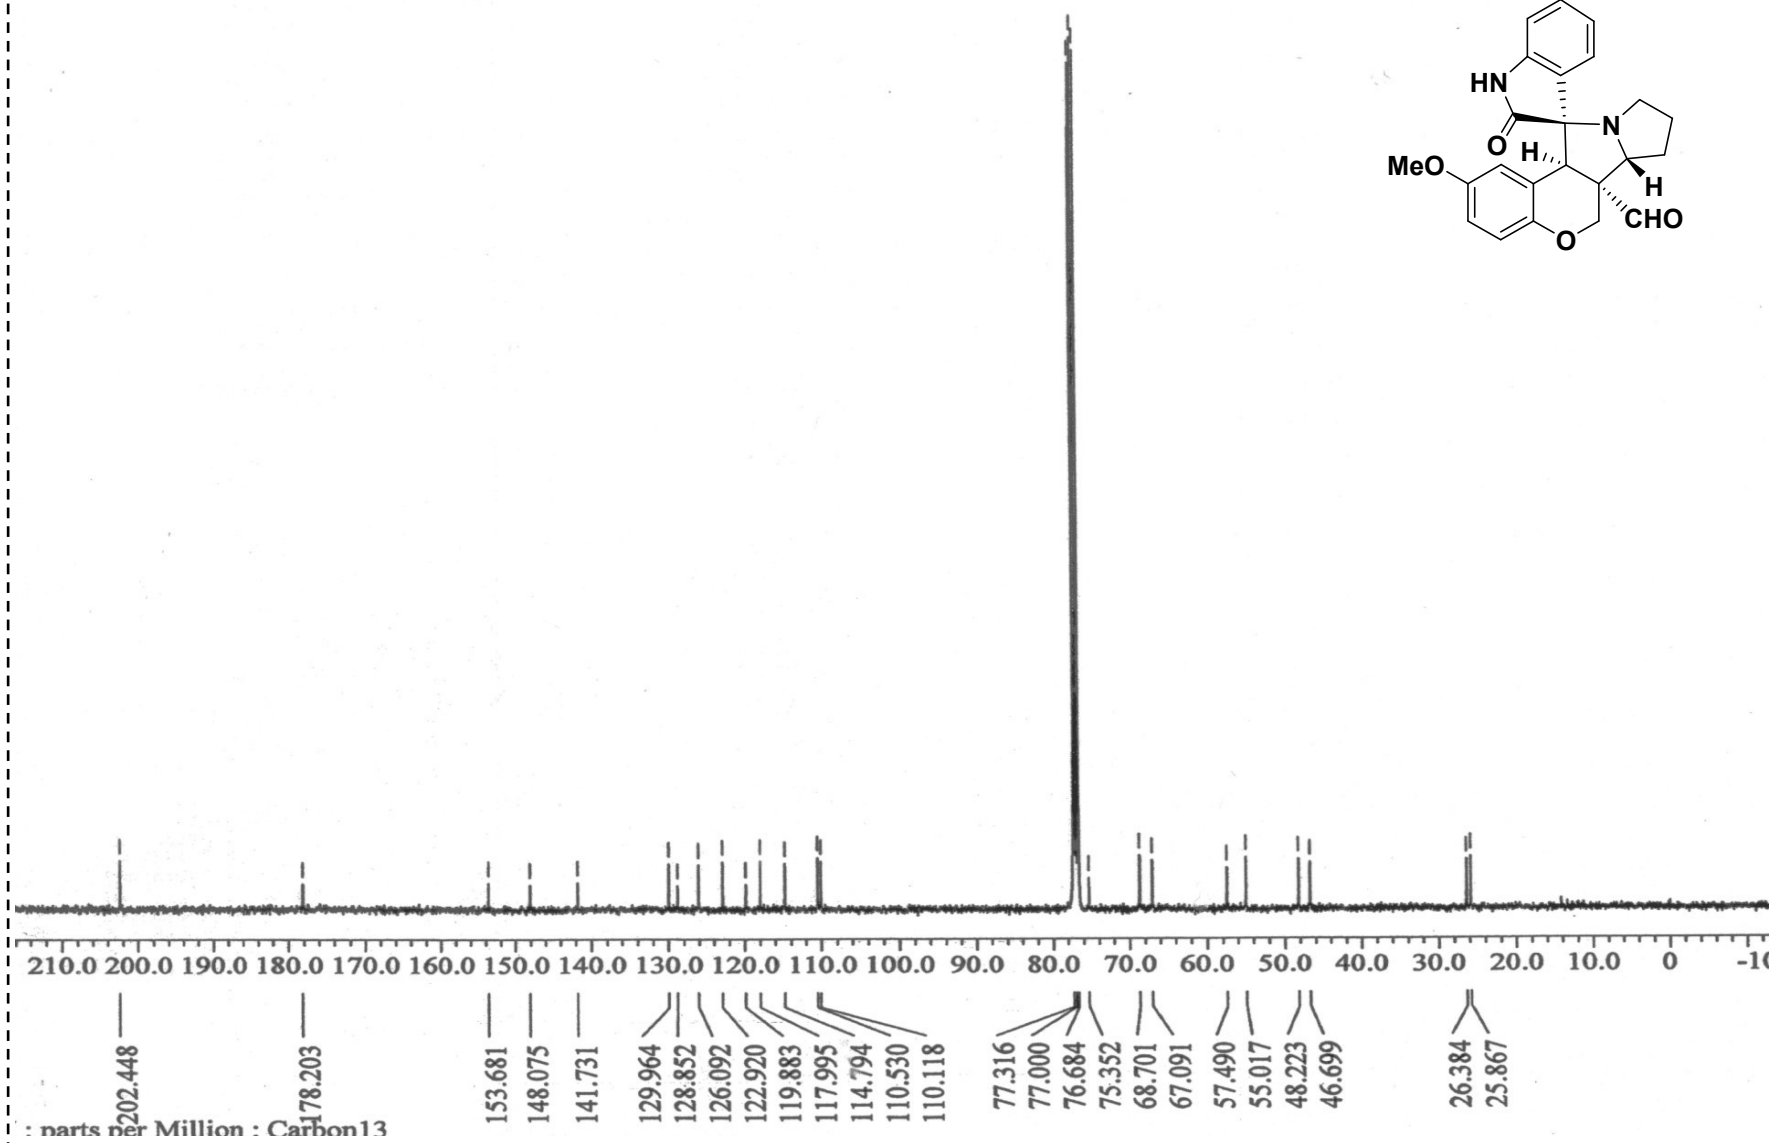

Fig S8. <sup>13</sup>C NMR spectrum of compound 16c in CDCl<sub>3</sub>

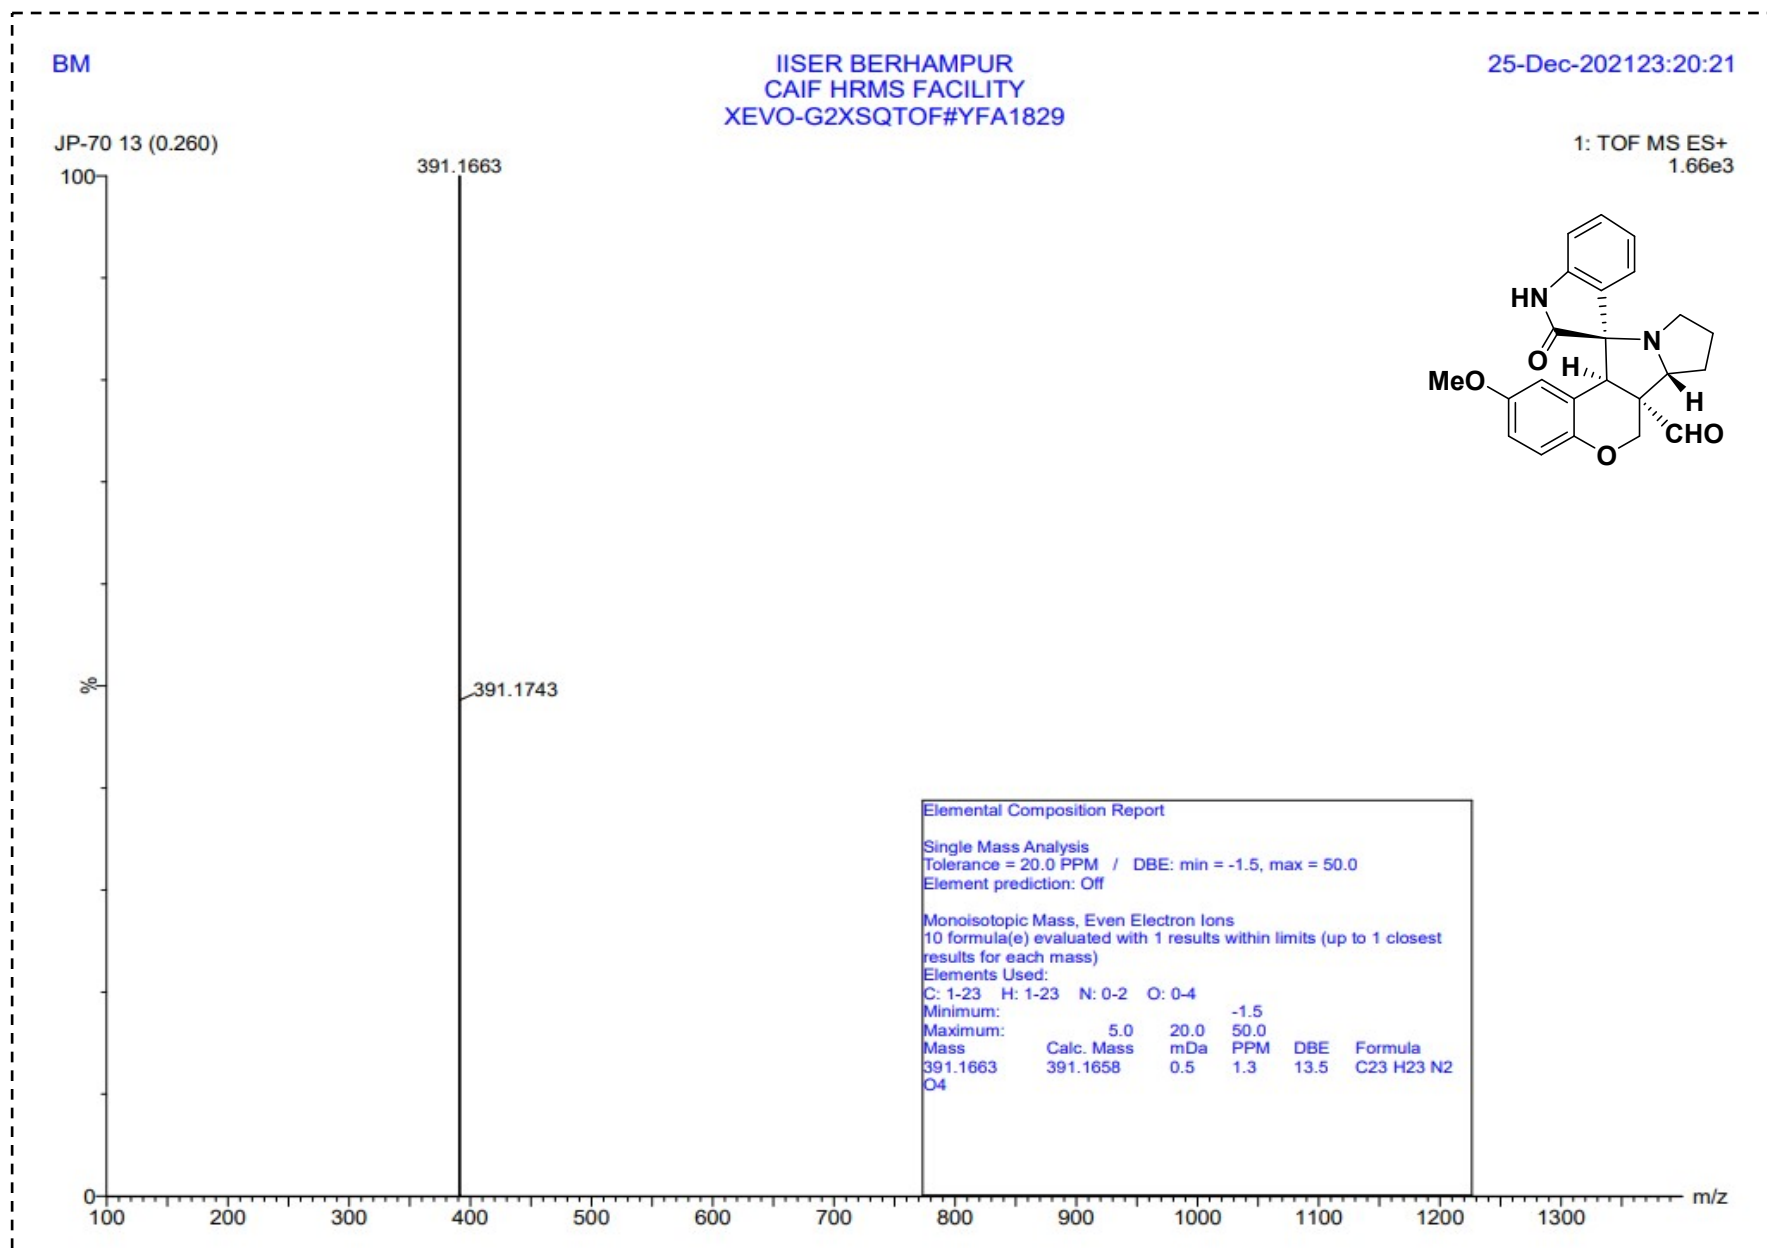

Fig S9. HRMS of compound 16c

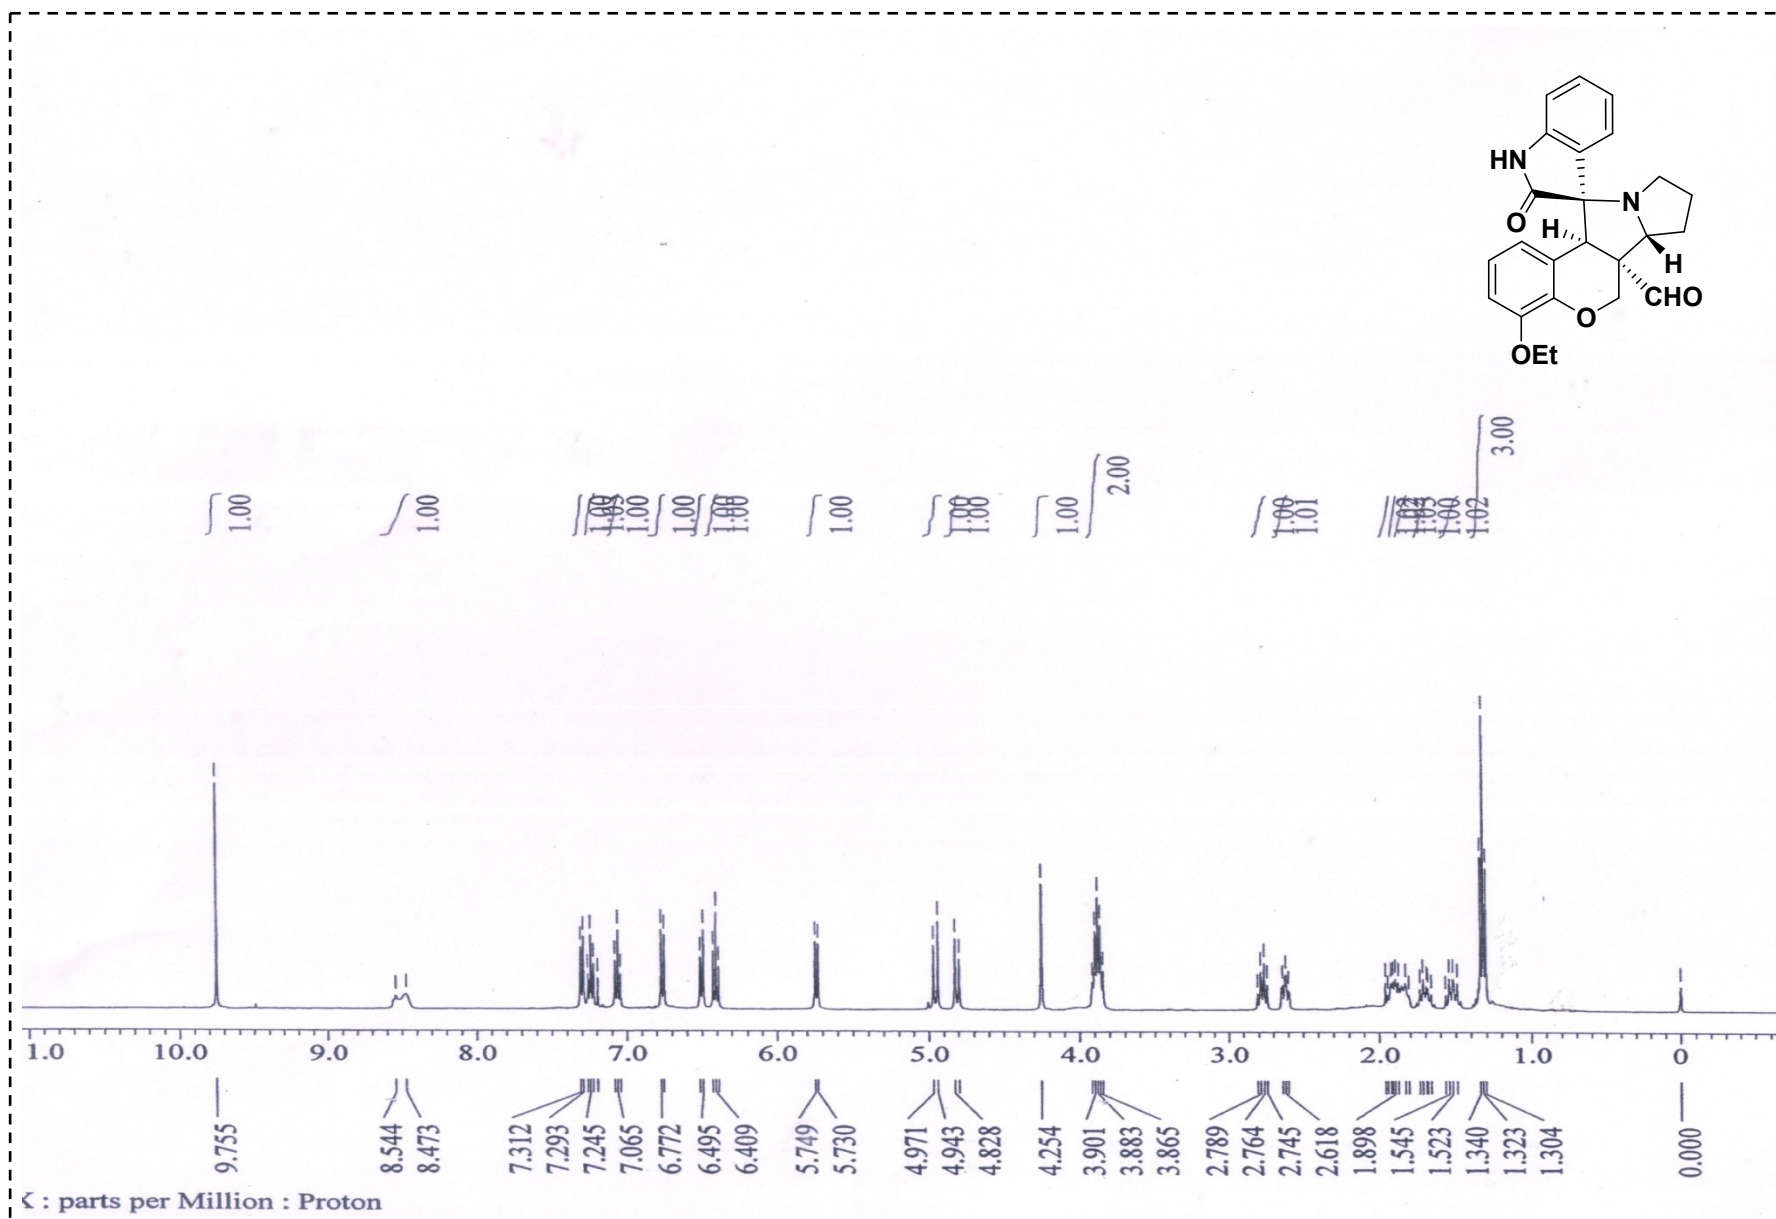

**Fig S10.** <sup>1</sup>H NMR spectrum of compound **16d** in CDCl<sub>3</sub>

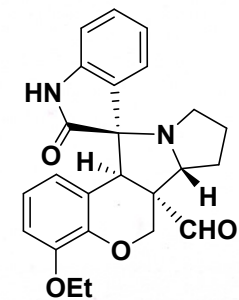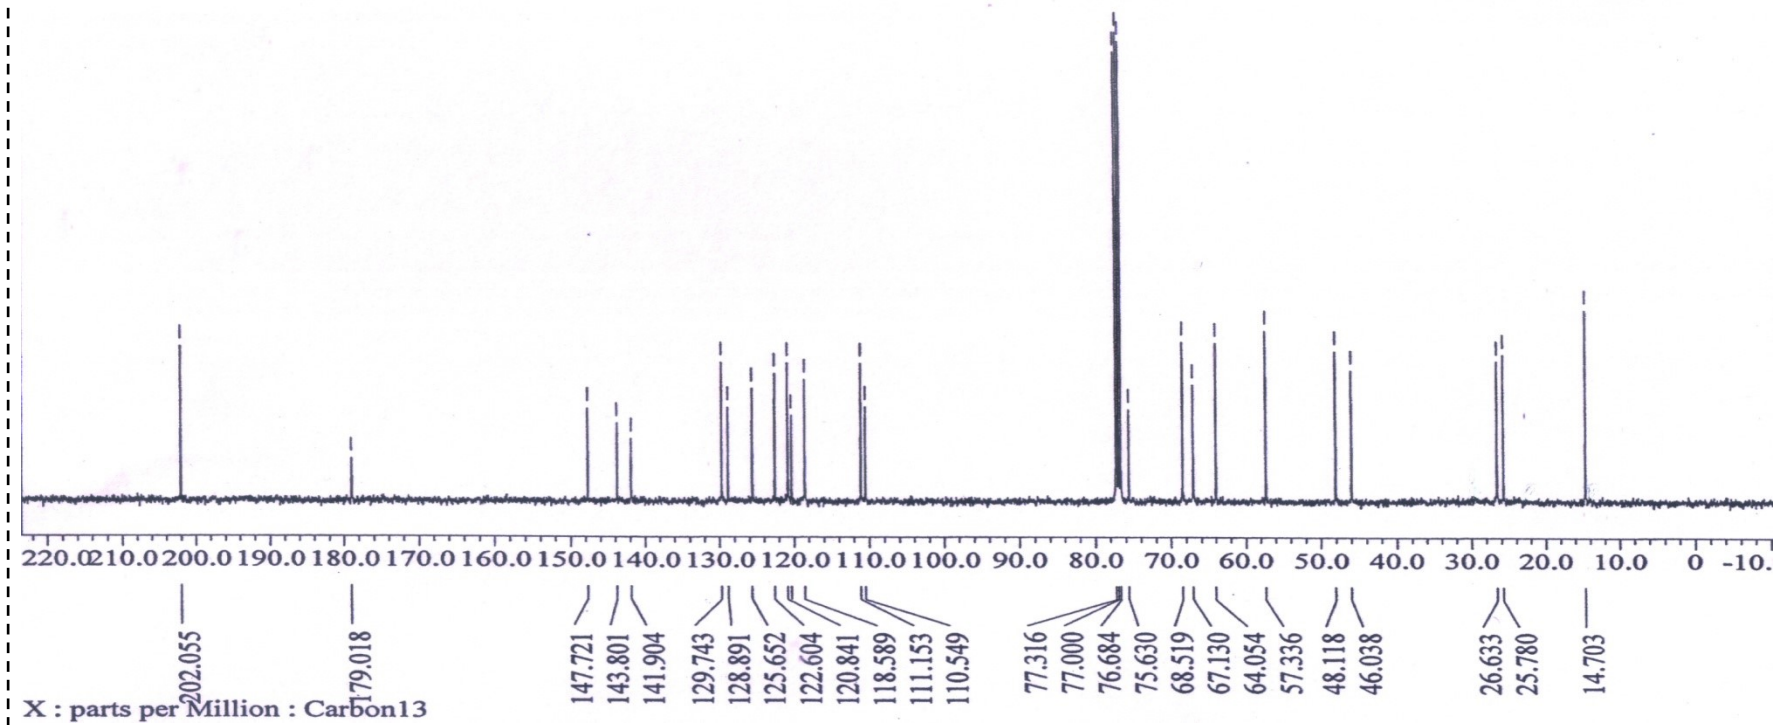

Fig S11.  $^{13}\text{C}$  NMR spectrum of compound 16d in  $\text{CDCl}_3$

BM

IISER BERHAMPUR  
CAIF HRMS FACILITY  
XEVO-G2XSQTOF#YFA1829

25-Dec-2021 23:38:41

JP-71 7 (0.147)

1: TOF MS ES+  
1.58e4

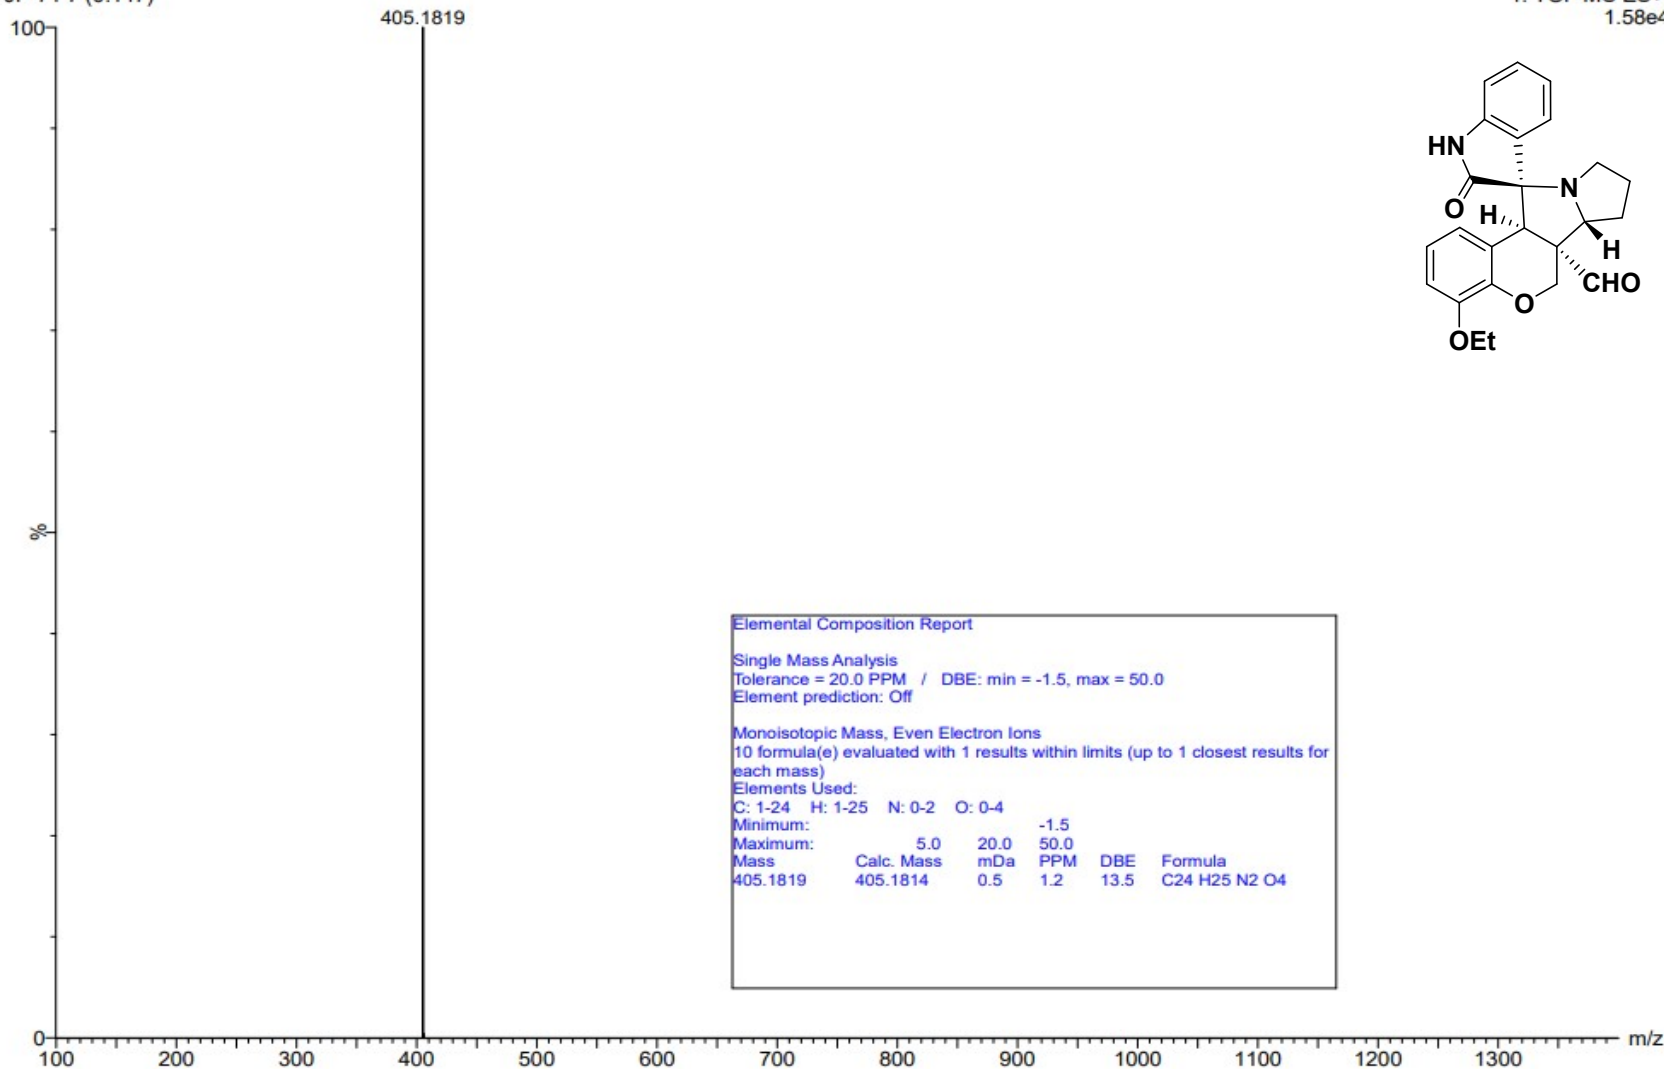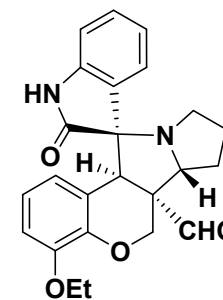

Fig S12. HRMS of compound 16d

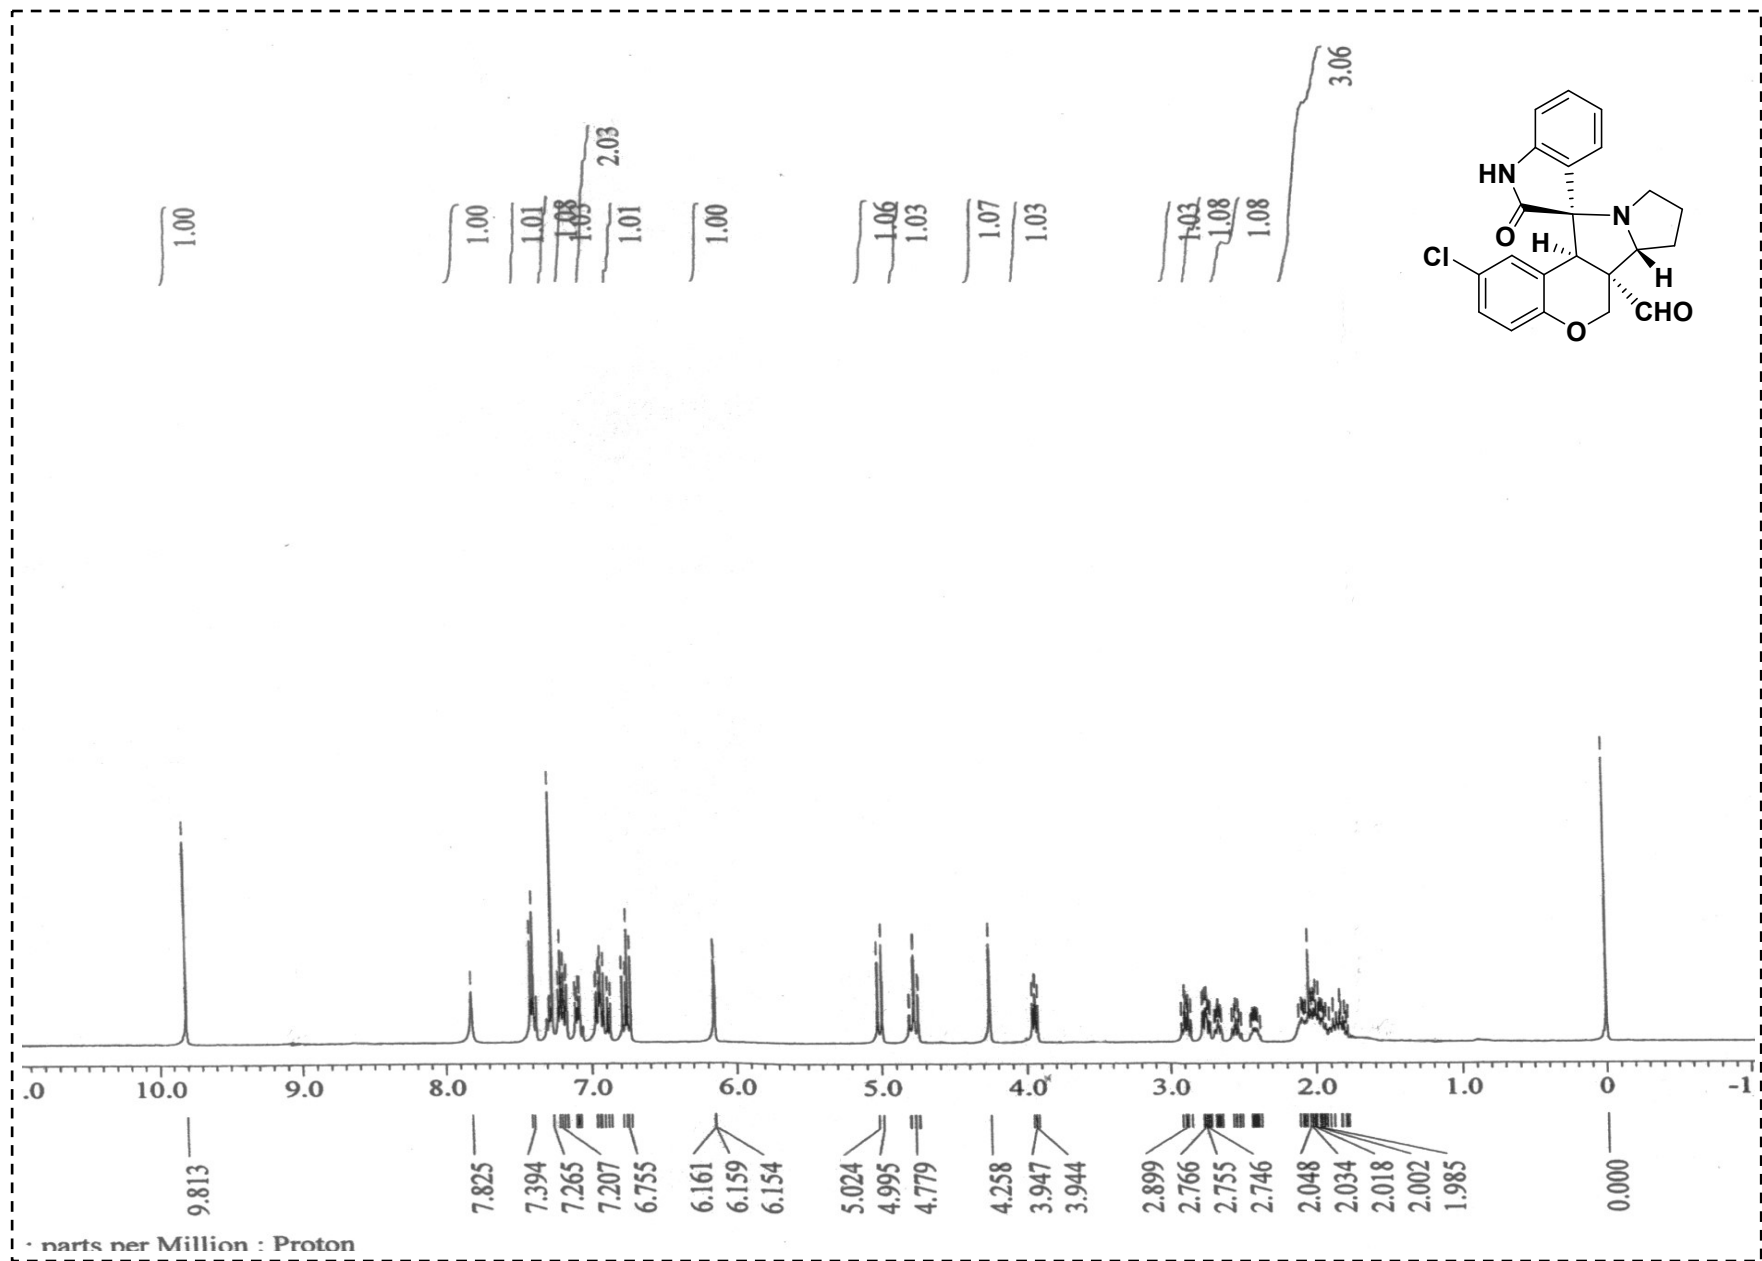

Fig S13. <sup>1</sup>H NMR spectrum of compound **16e** in CDCl<sub>3</sub>

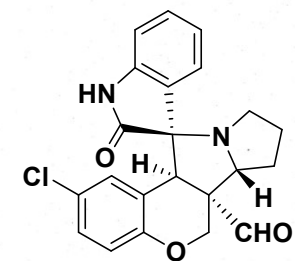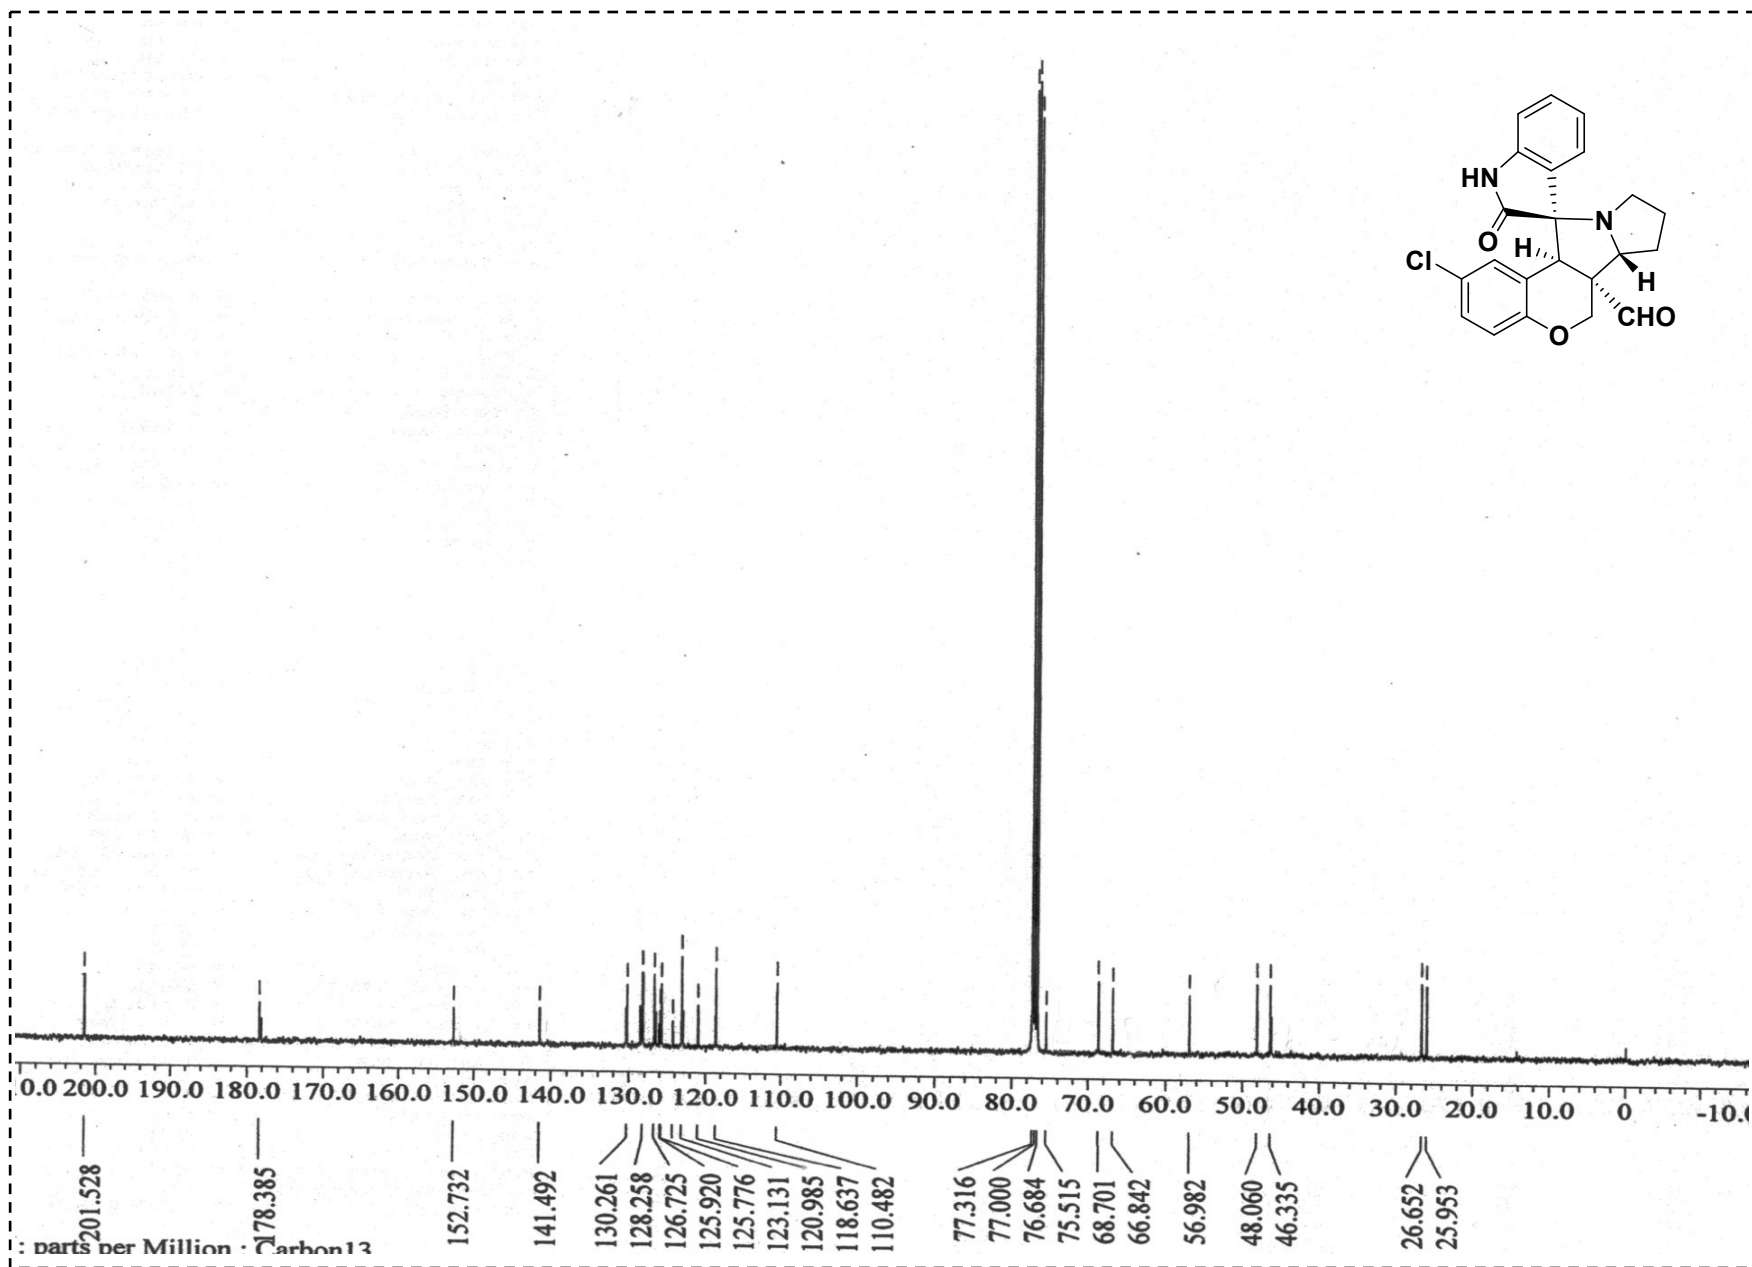

Fig S14. <sup>13</sup>C NMR spectrum of compound 16e in CDCl<sub>3</sub>

BM

IISER BERHAMPUR  
CAIF HRMS FACILITY  
XEVO-G2XSQTOF#YFA1829

25-Dec-2021 23:05:08

JP-69 2 (0.062)

1: TOF MS ES+  
2.05e6

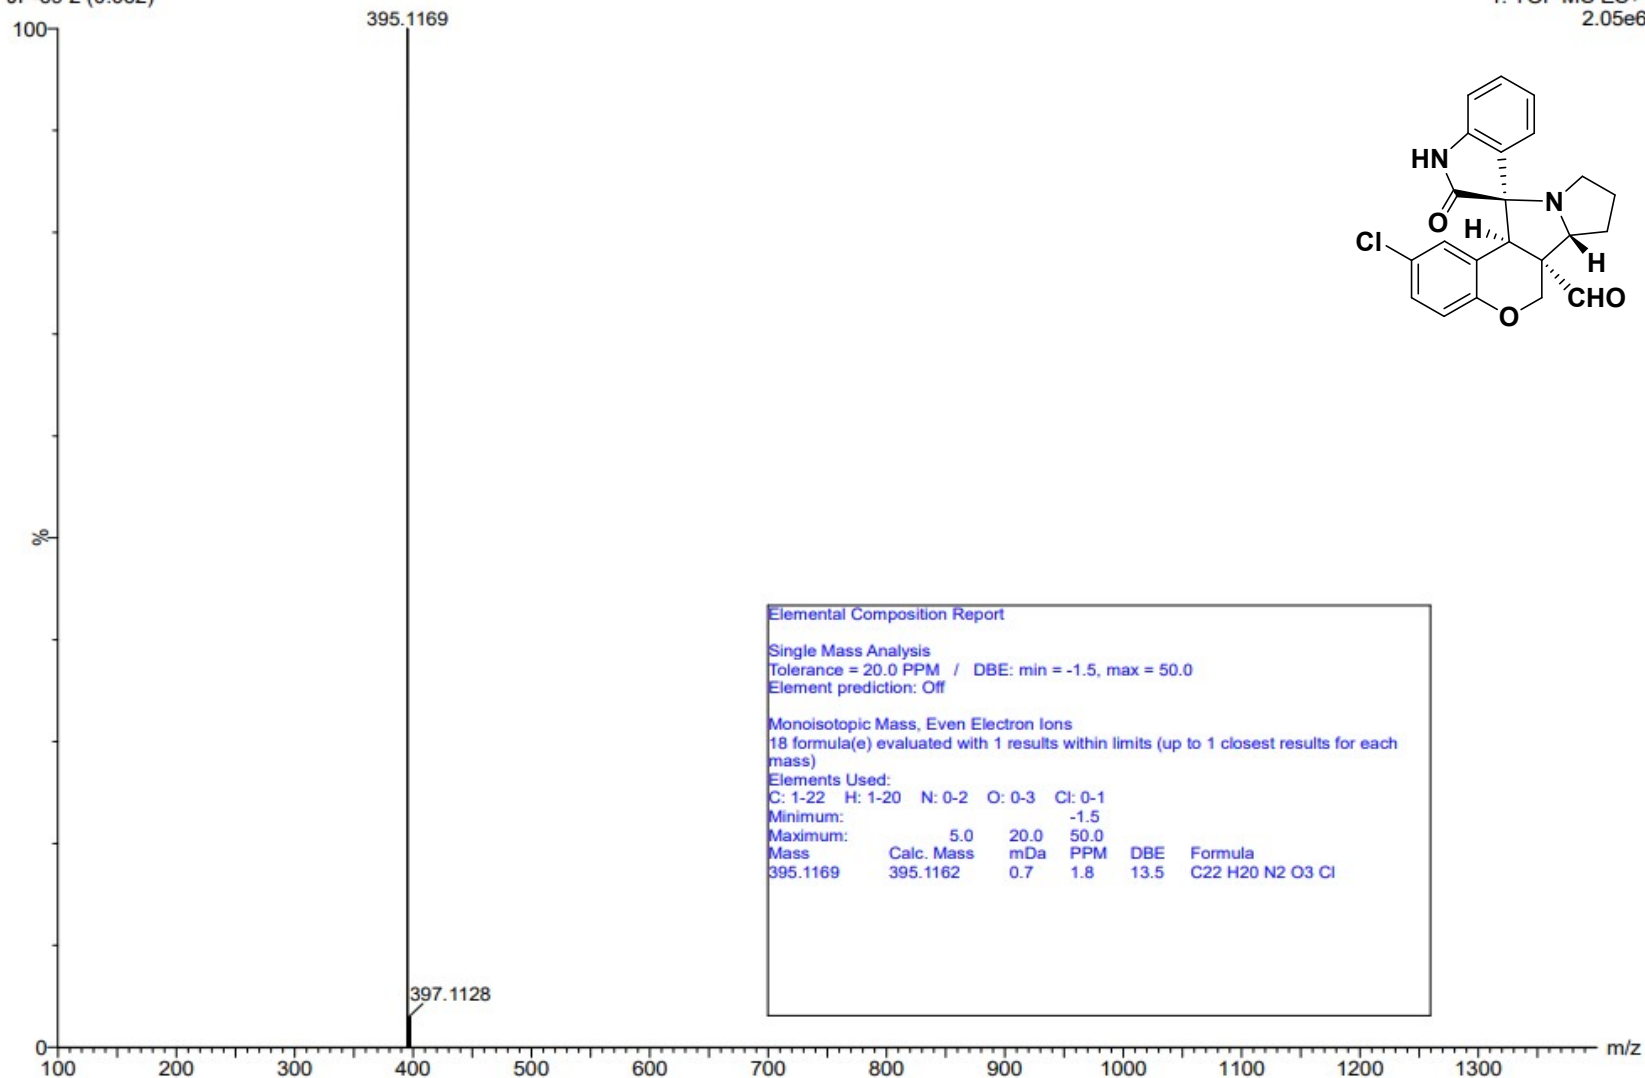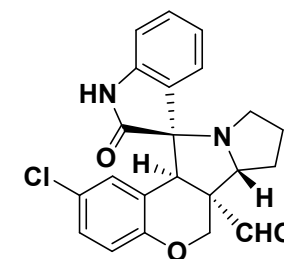

Elemental Composition Report

Single Mass Analysis  
Tolerance = 20.0 PPM / DBE: min = -1.5, max = 50.0  
Element prediction: Off

Monoisotopic Mass, Even Electron Ions  
18 formula(e) evaluated with 1 results within limits (up to 1 closest results for each mass)

Elements Used:

C: 1-22 H: 1-20 N: 0-2 O: 0-3 Cl: 0-1

Minimum: 5.0 20.0 50.0 -1.5

Maximum: 5.0 20.0 50.0 -1.5

| Mass     | Calc. Mass | mDa | PPM | DBE  | Formula          |
|----------|------------|-----|-----|------|------------------|
| 395.1169 | 395.1162   | 0.7 | 1.8 | 13.5 | C22 H20 N2 O3 Cl |

Fig S15. HRMS of compound 16e



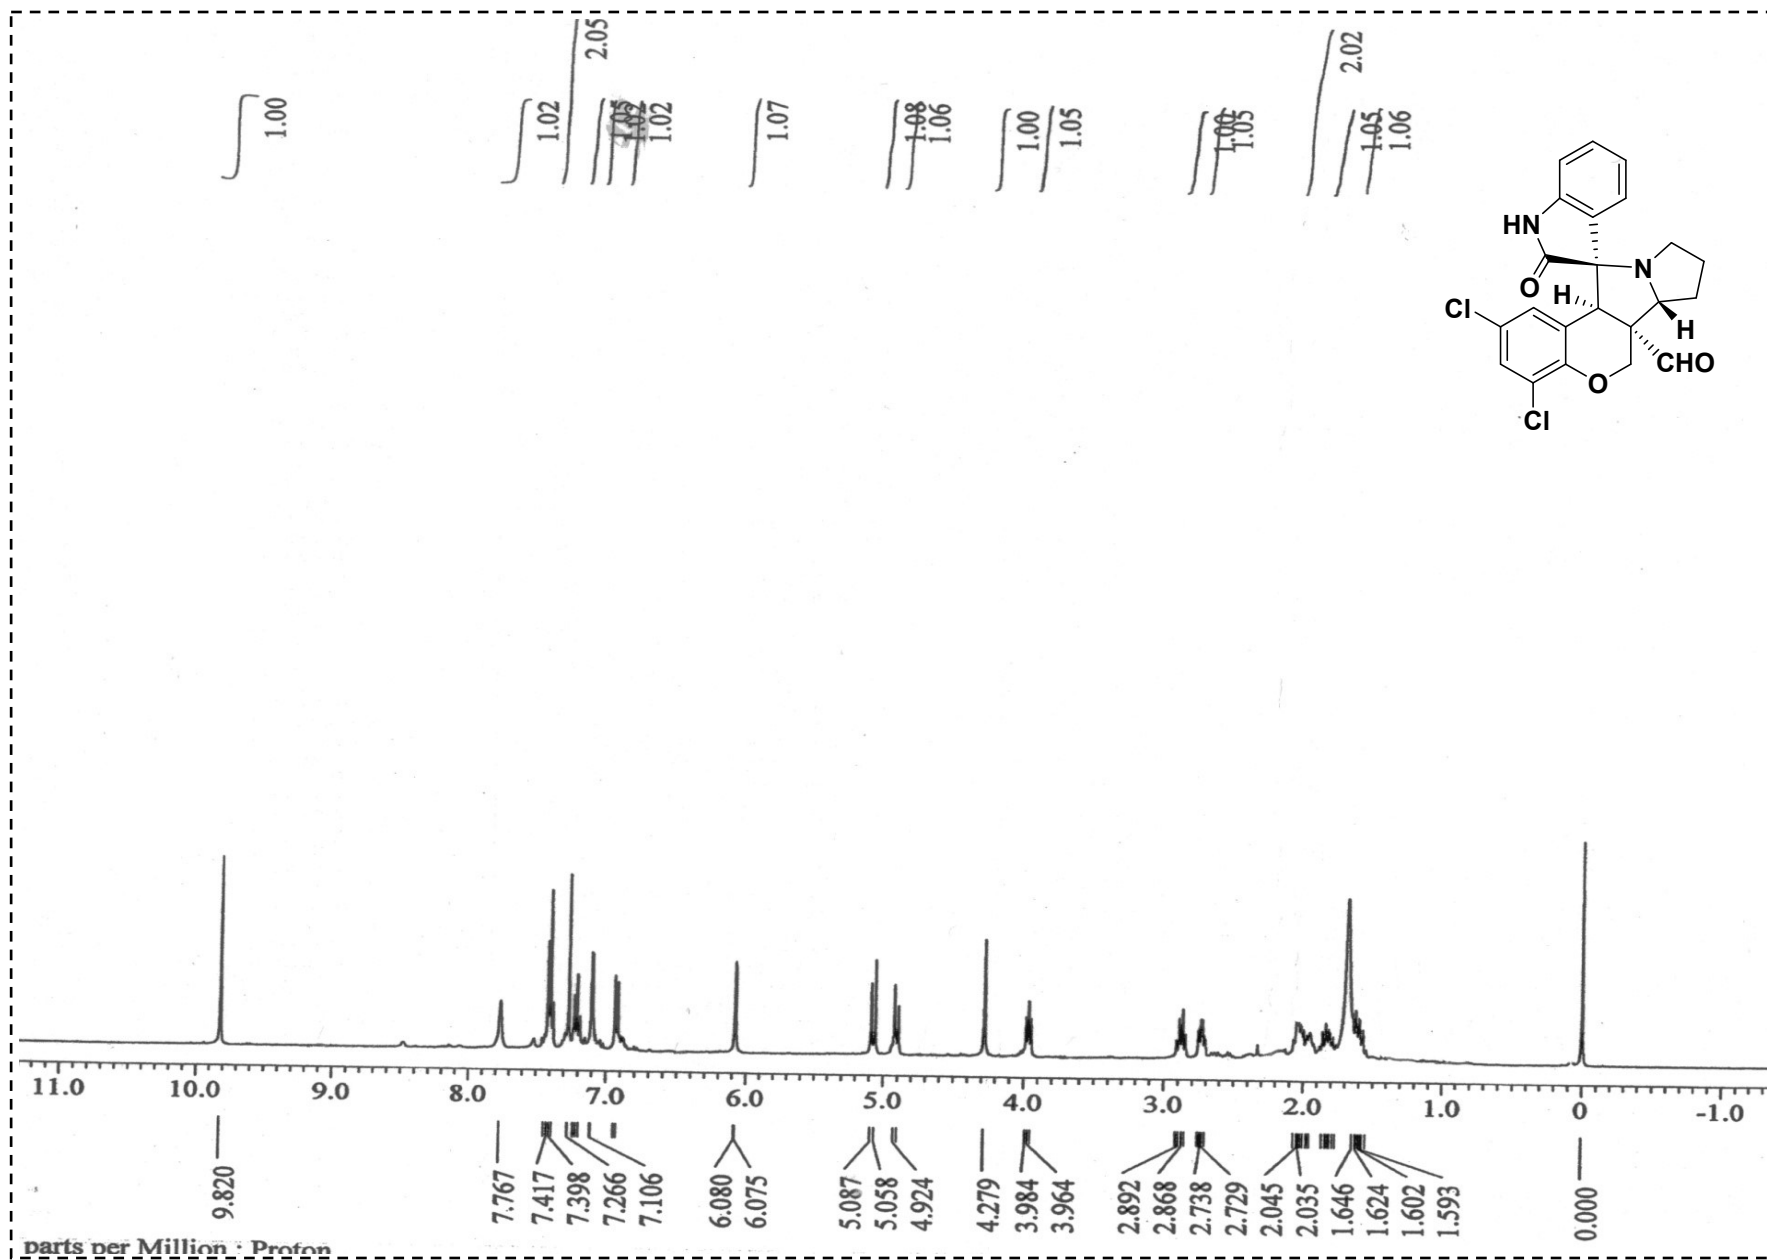

**Fig S16.** <sup>1</sup>H NMR spectrum of compound 16f in CDCl<sub>3</sub>

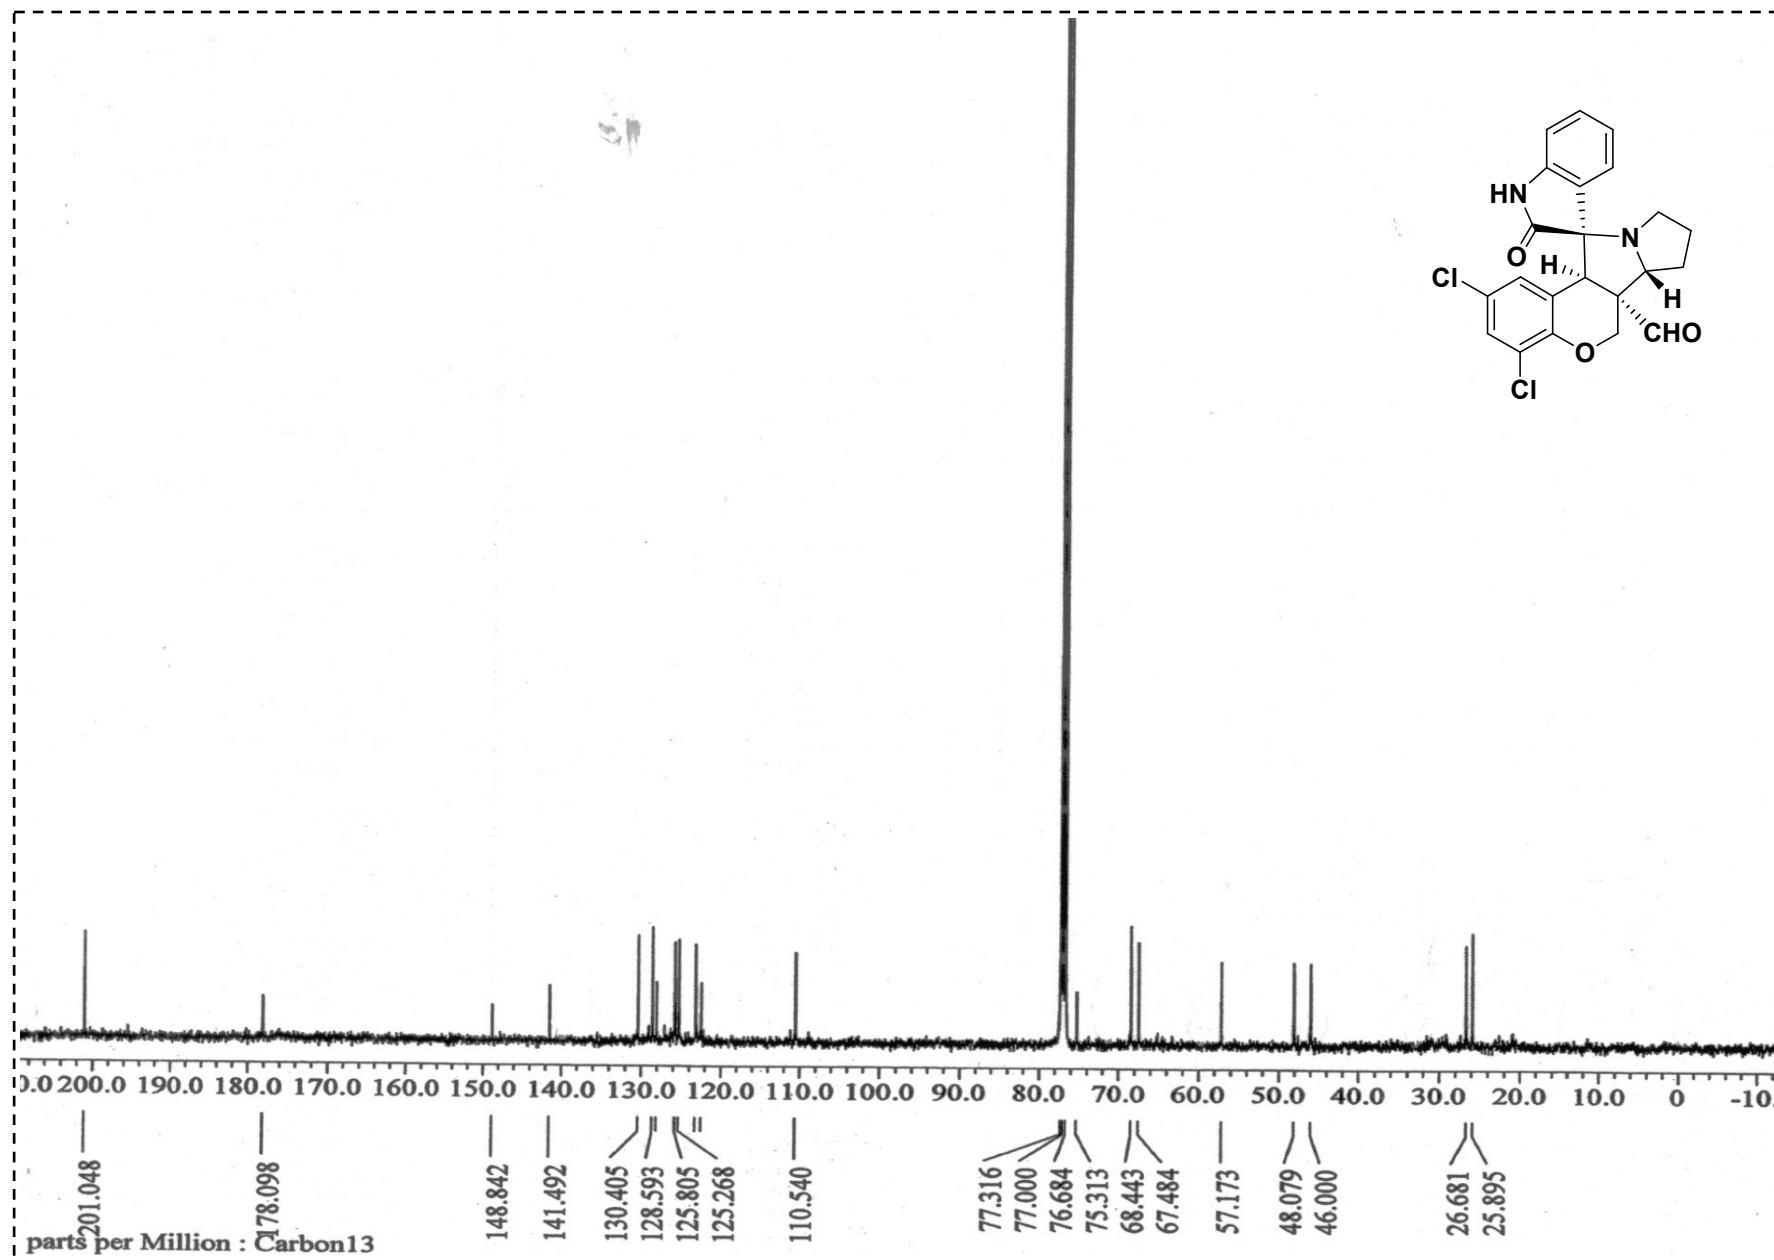

Fig S17. <sup>13</sup>C NMR spectrum of compound **16f** in CDCl<sub>3</sub>

BM

IISER BERHAMPUR  
CAIF HRMS FACILITY  
XEVO-G2XSQTOF#YFA1829

15-Feb-2022 10:40:31

JP-50 16 (0.310)

1: TOF MS ES+  
2.16e4

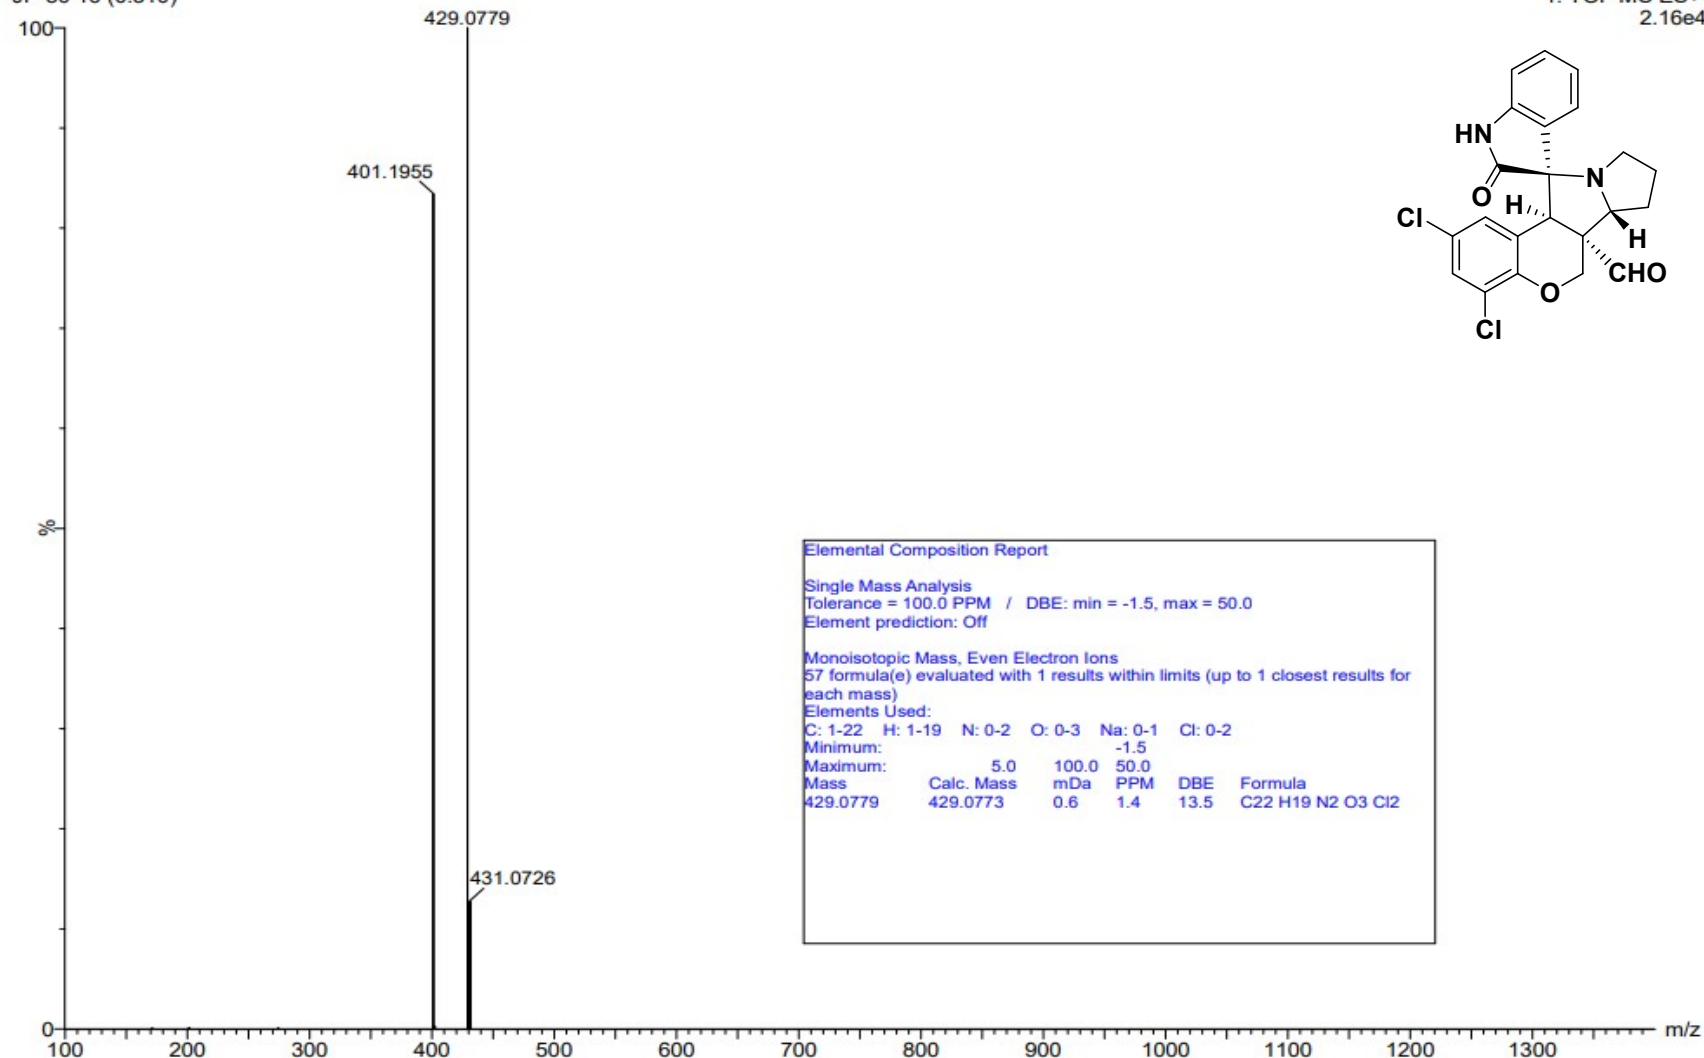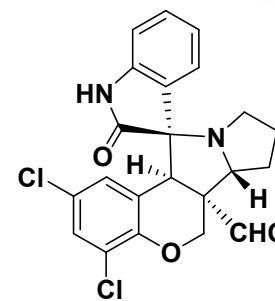

Fig S18. HRMS of compound 16f

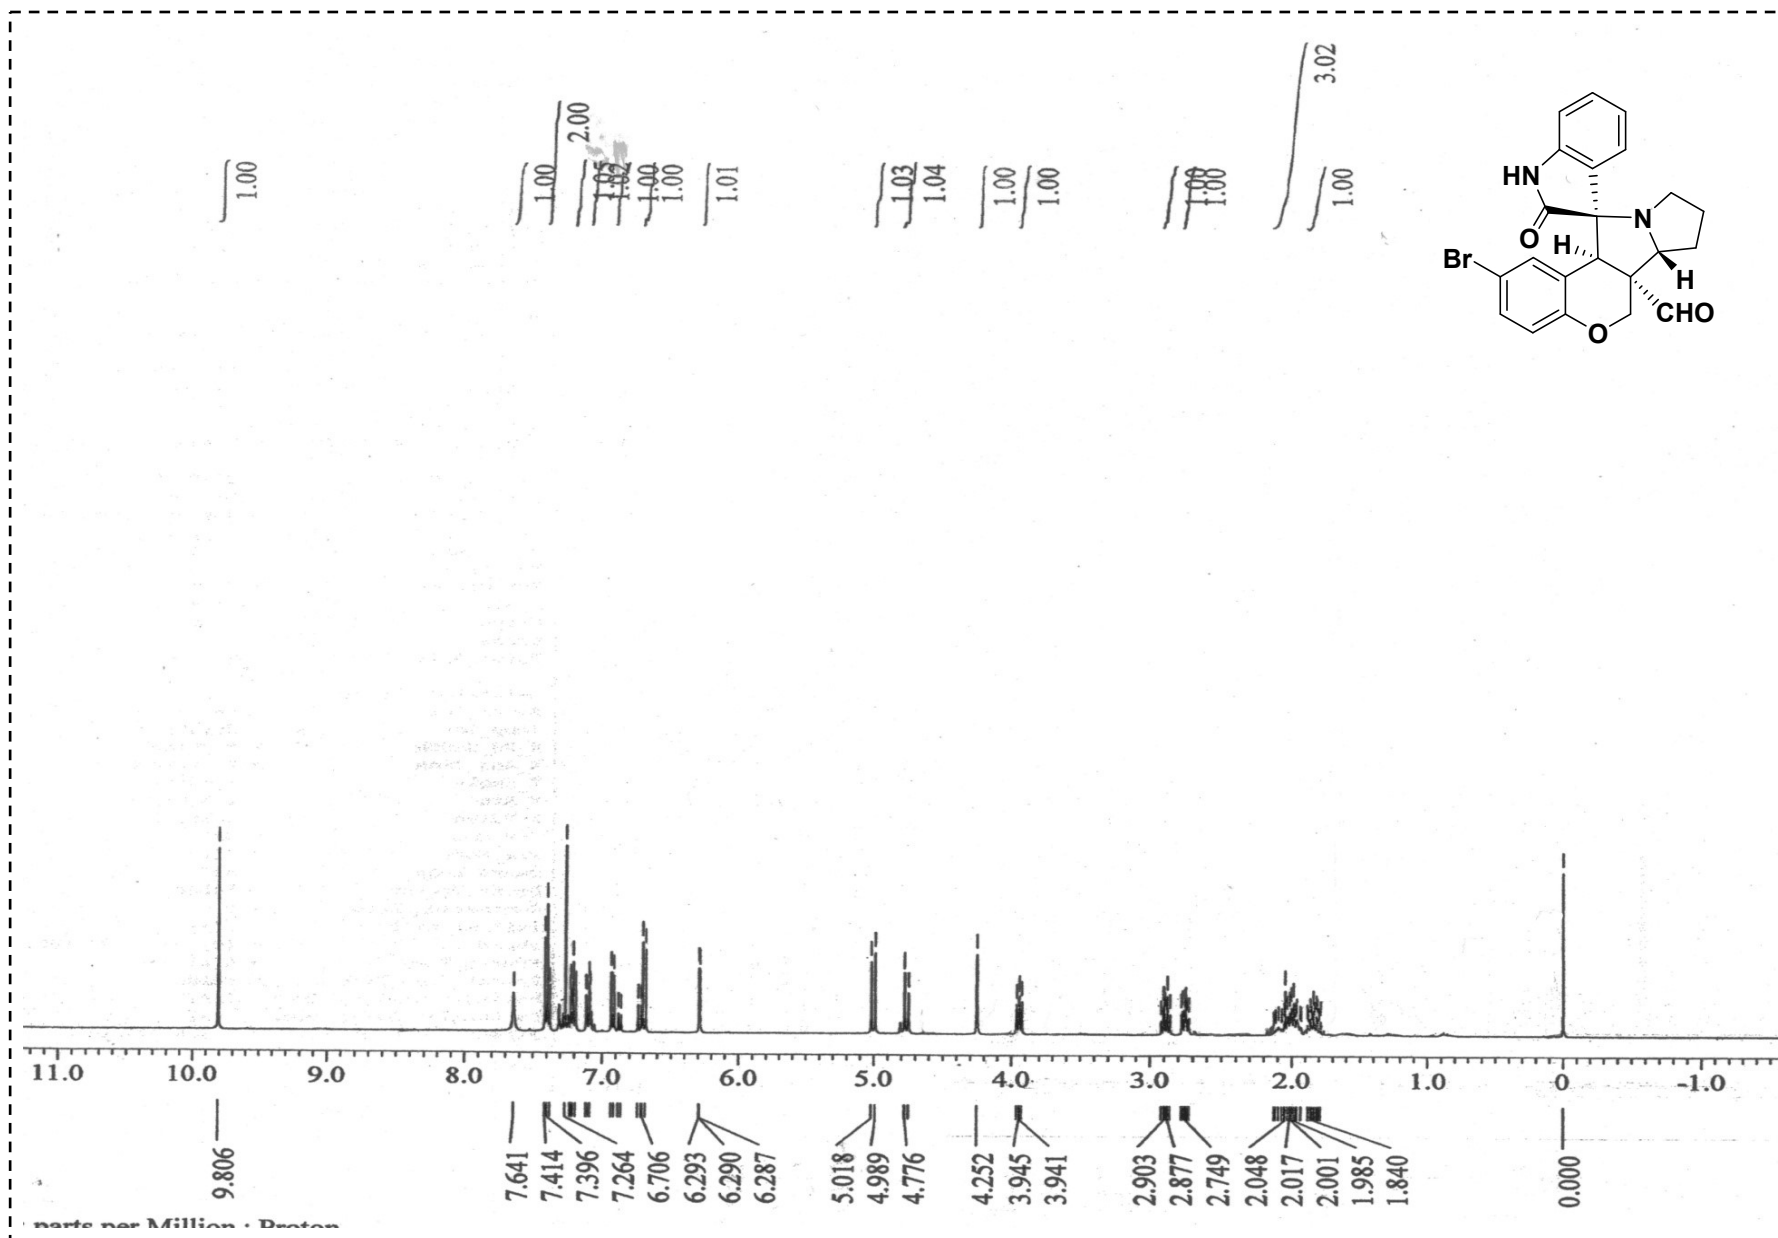

Fig S19. <sup>1</sup>H NMR spectrum of compound 16g in CDCl<sub>3</sub>

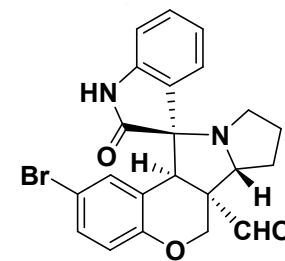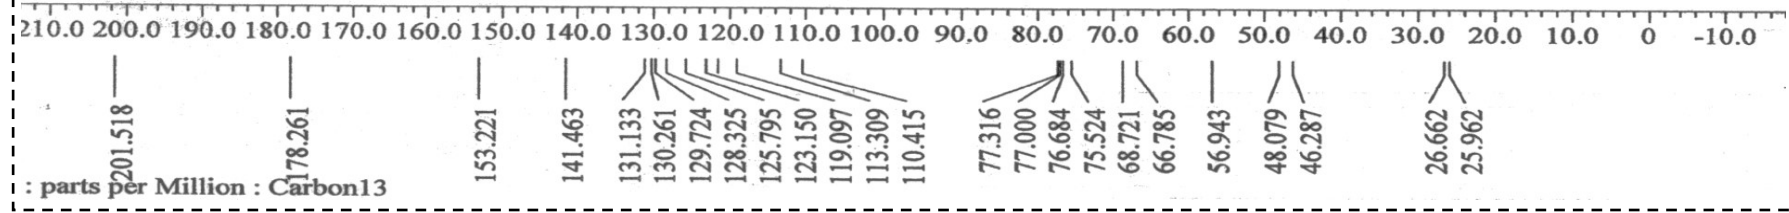

Fig S20. <sup>13</sup>C NMR spectrum of compound 16g in CDCl<sub>3</sub>

BM

IISER BERHAMPUR  
CAIF HRMS FACILITY  
XEVO-G2XSQTOF#YFA1829

15-Feb-2022 10:51:01

JP-75 5 (0.113)

1: TOF MS ES+  
2.33e6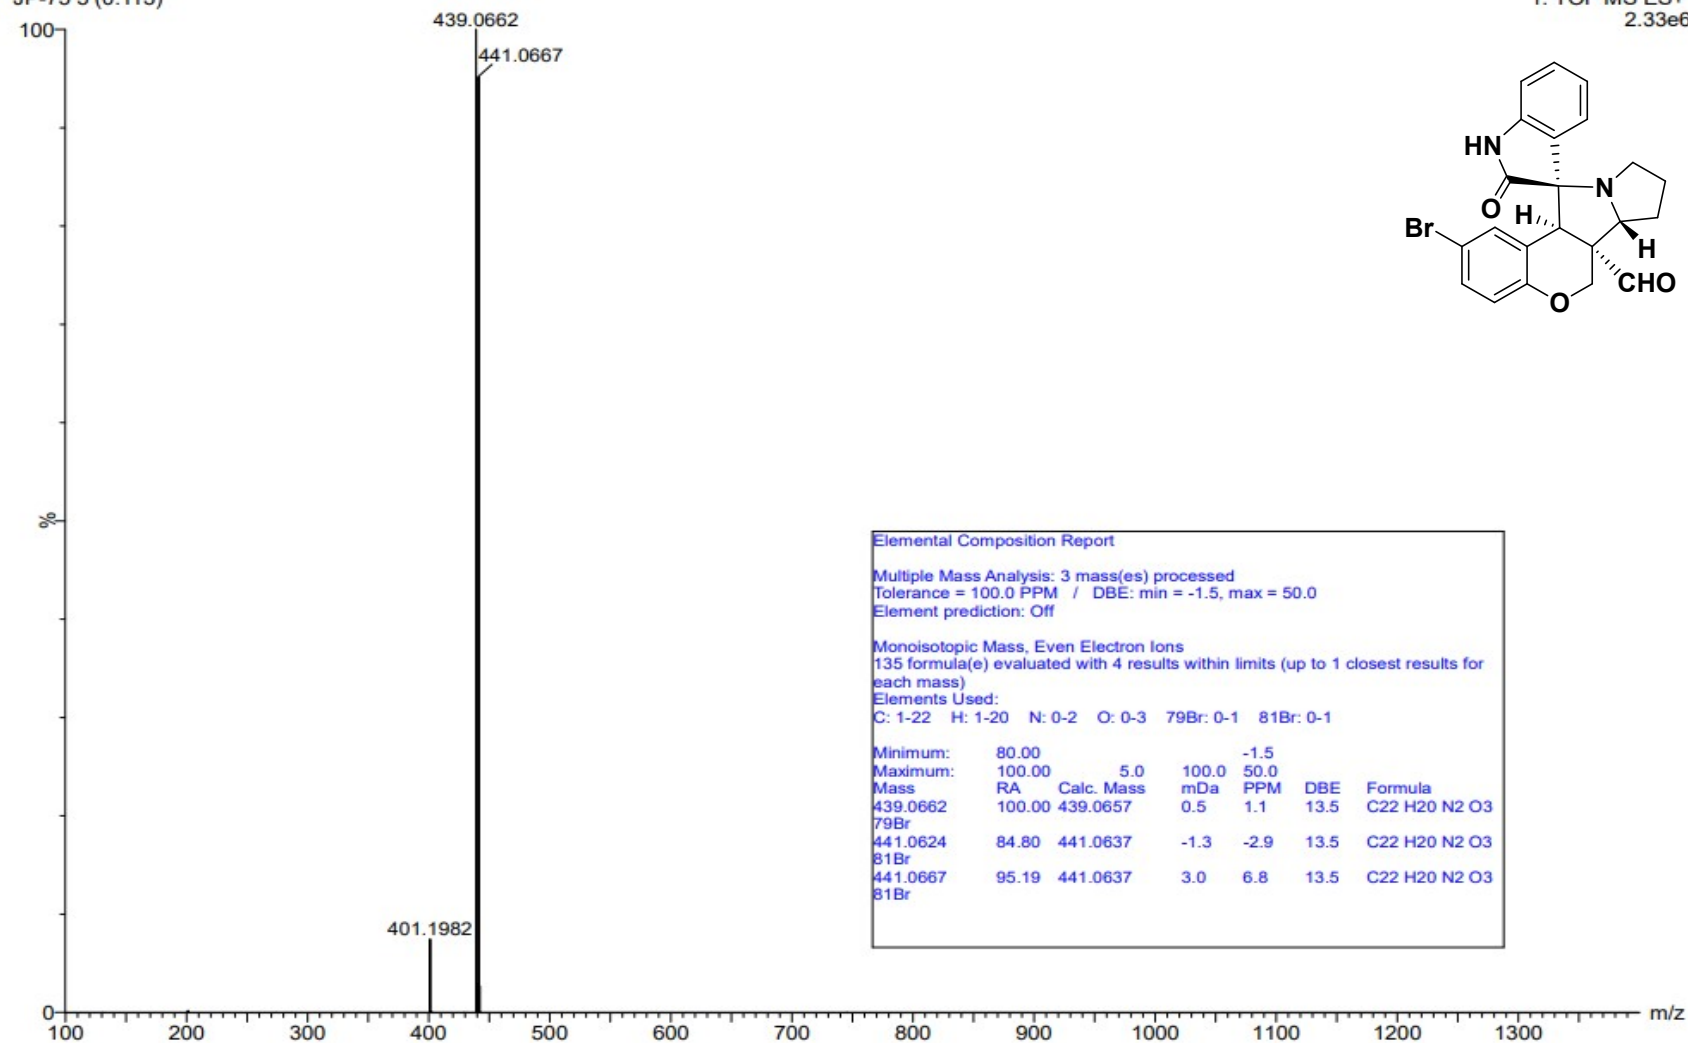

Fig S21. HRMS of compound 16g

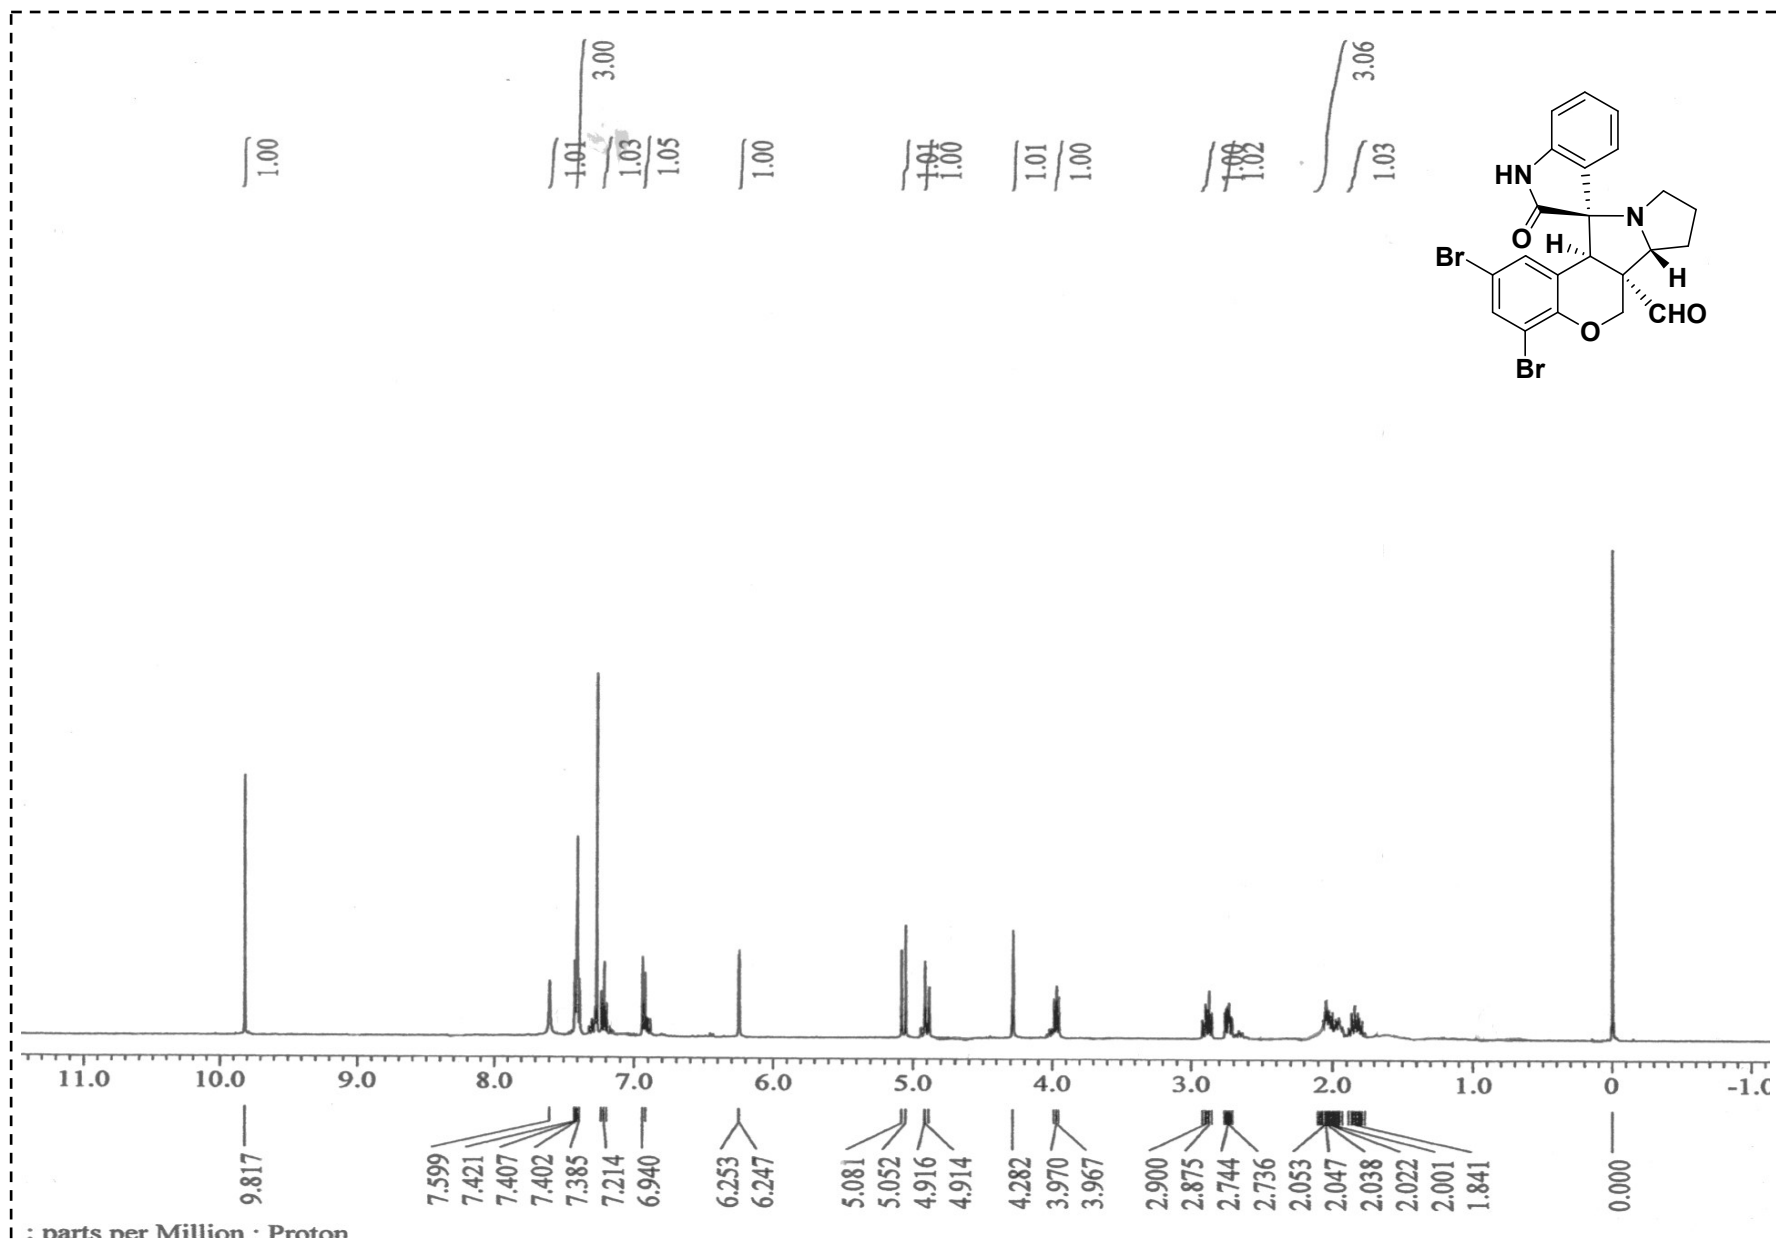

Fig S22.  $^1\text{H NMR}$  spectrum of compound **16h** in  $\text{CDCl}_3$

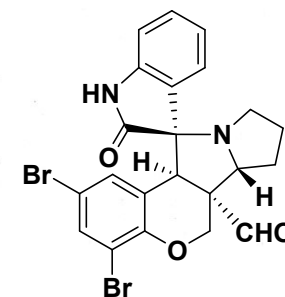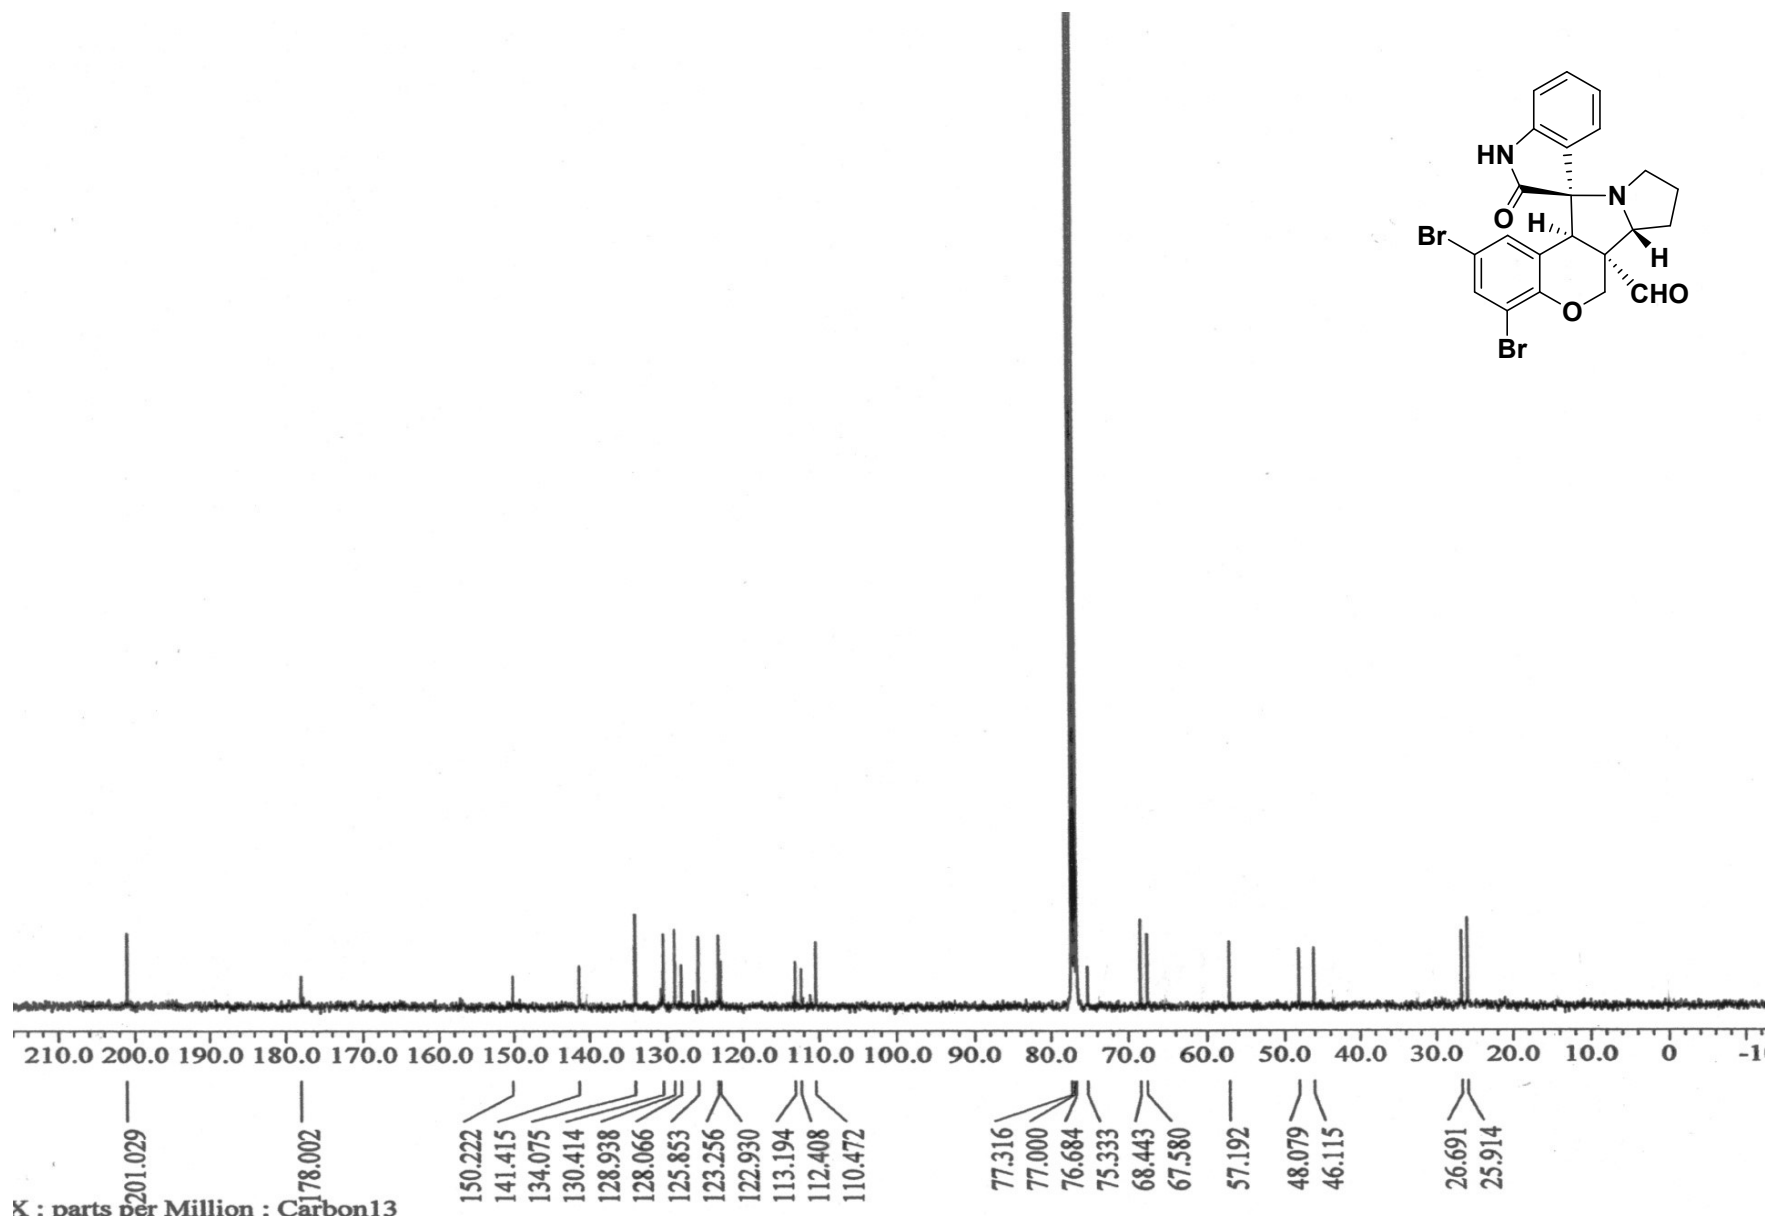

Fig S23.  $^{13}\text{C}$  NMR spectrum of compound 16h in  $\text{CDCl}_3$



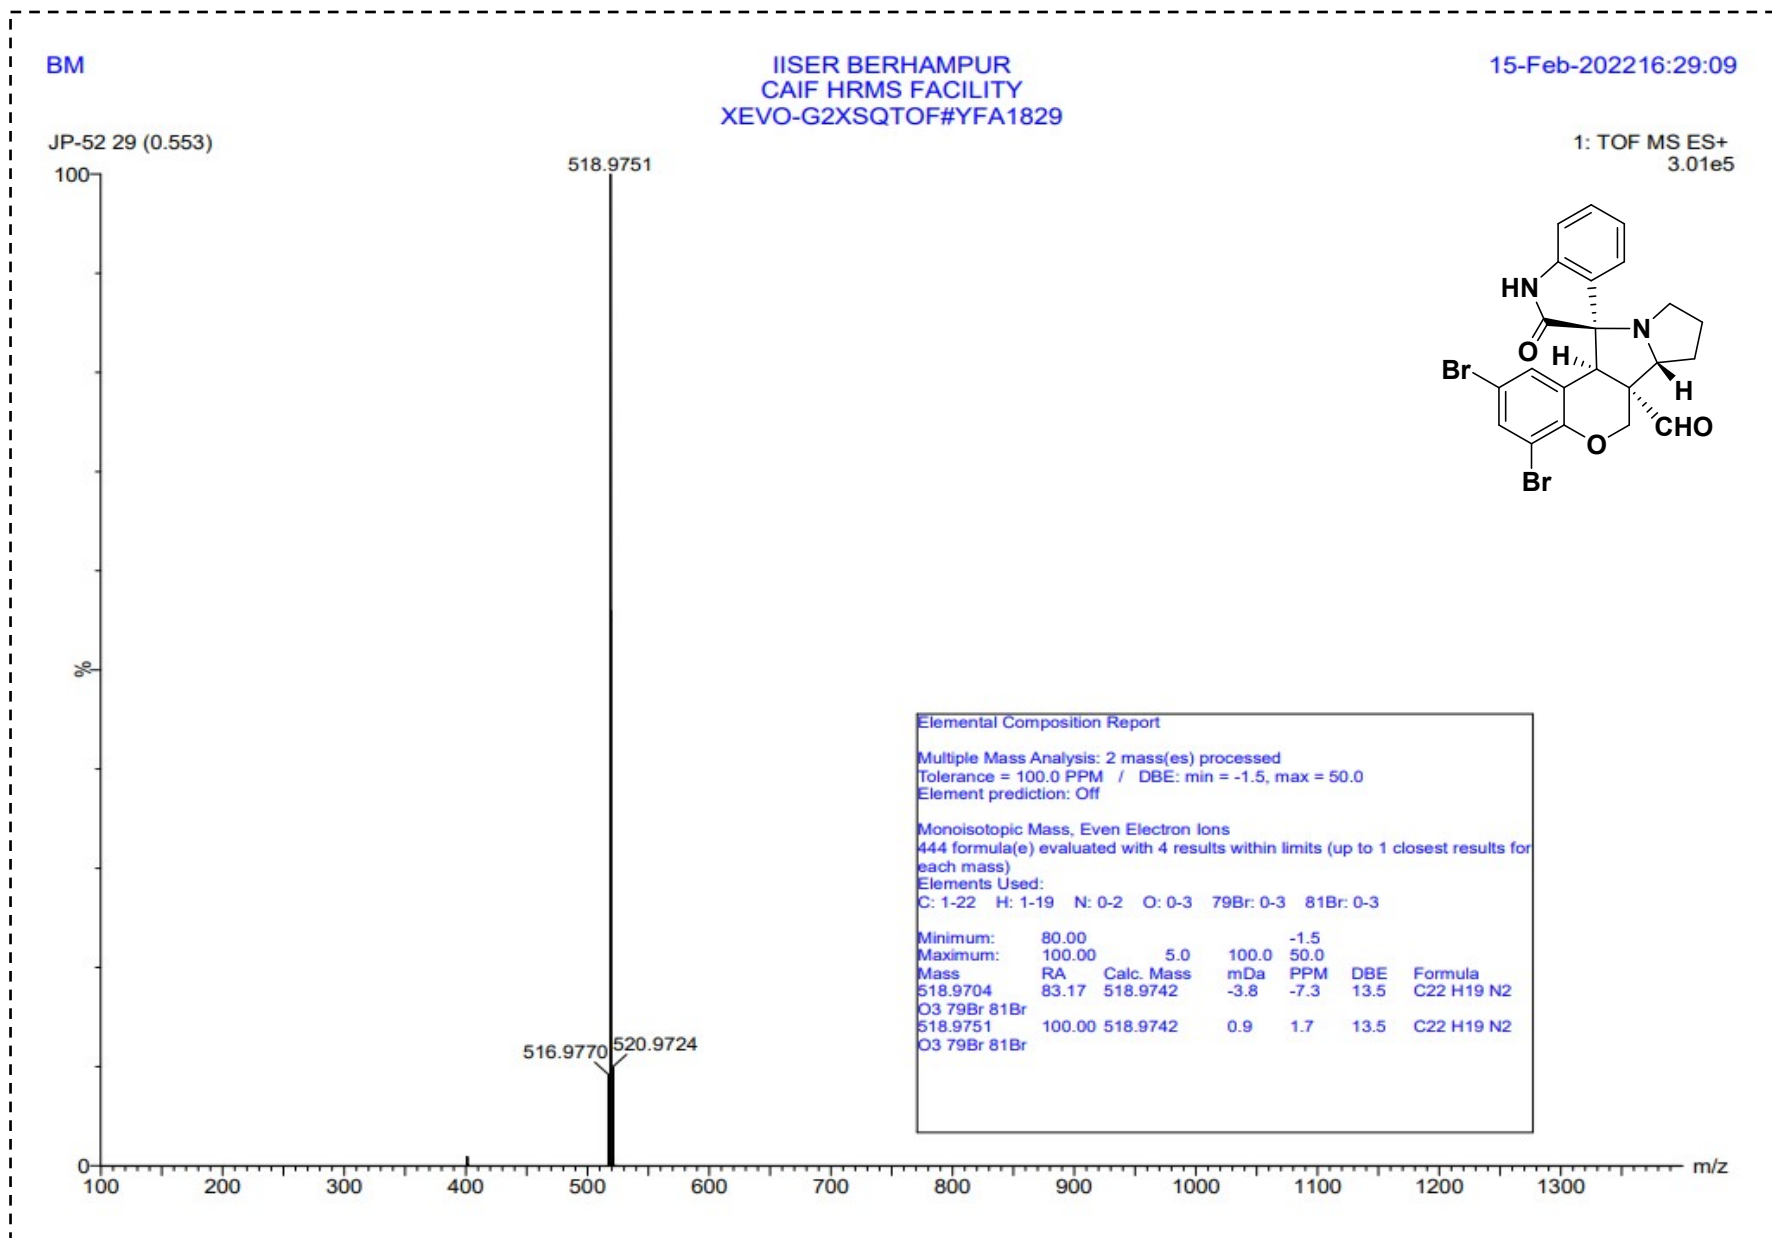

Fig S24. HRMS of compound 16h

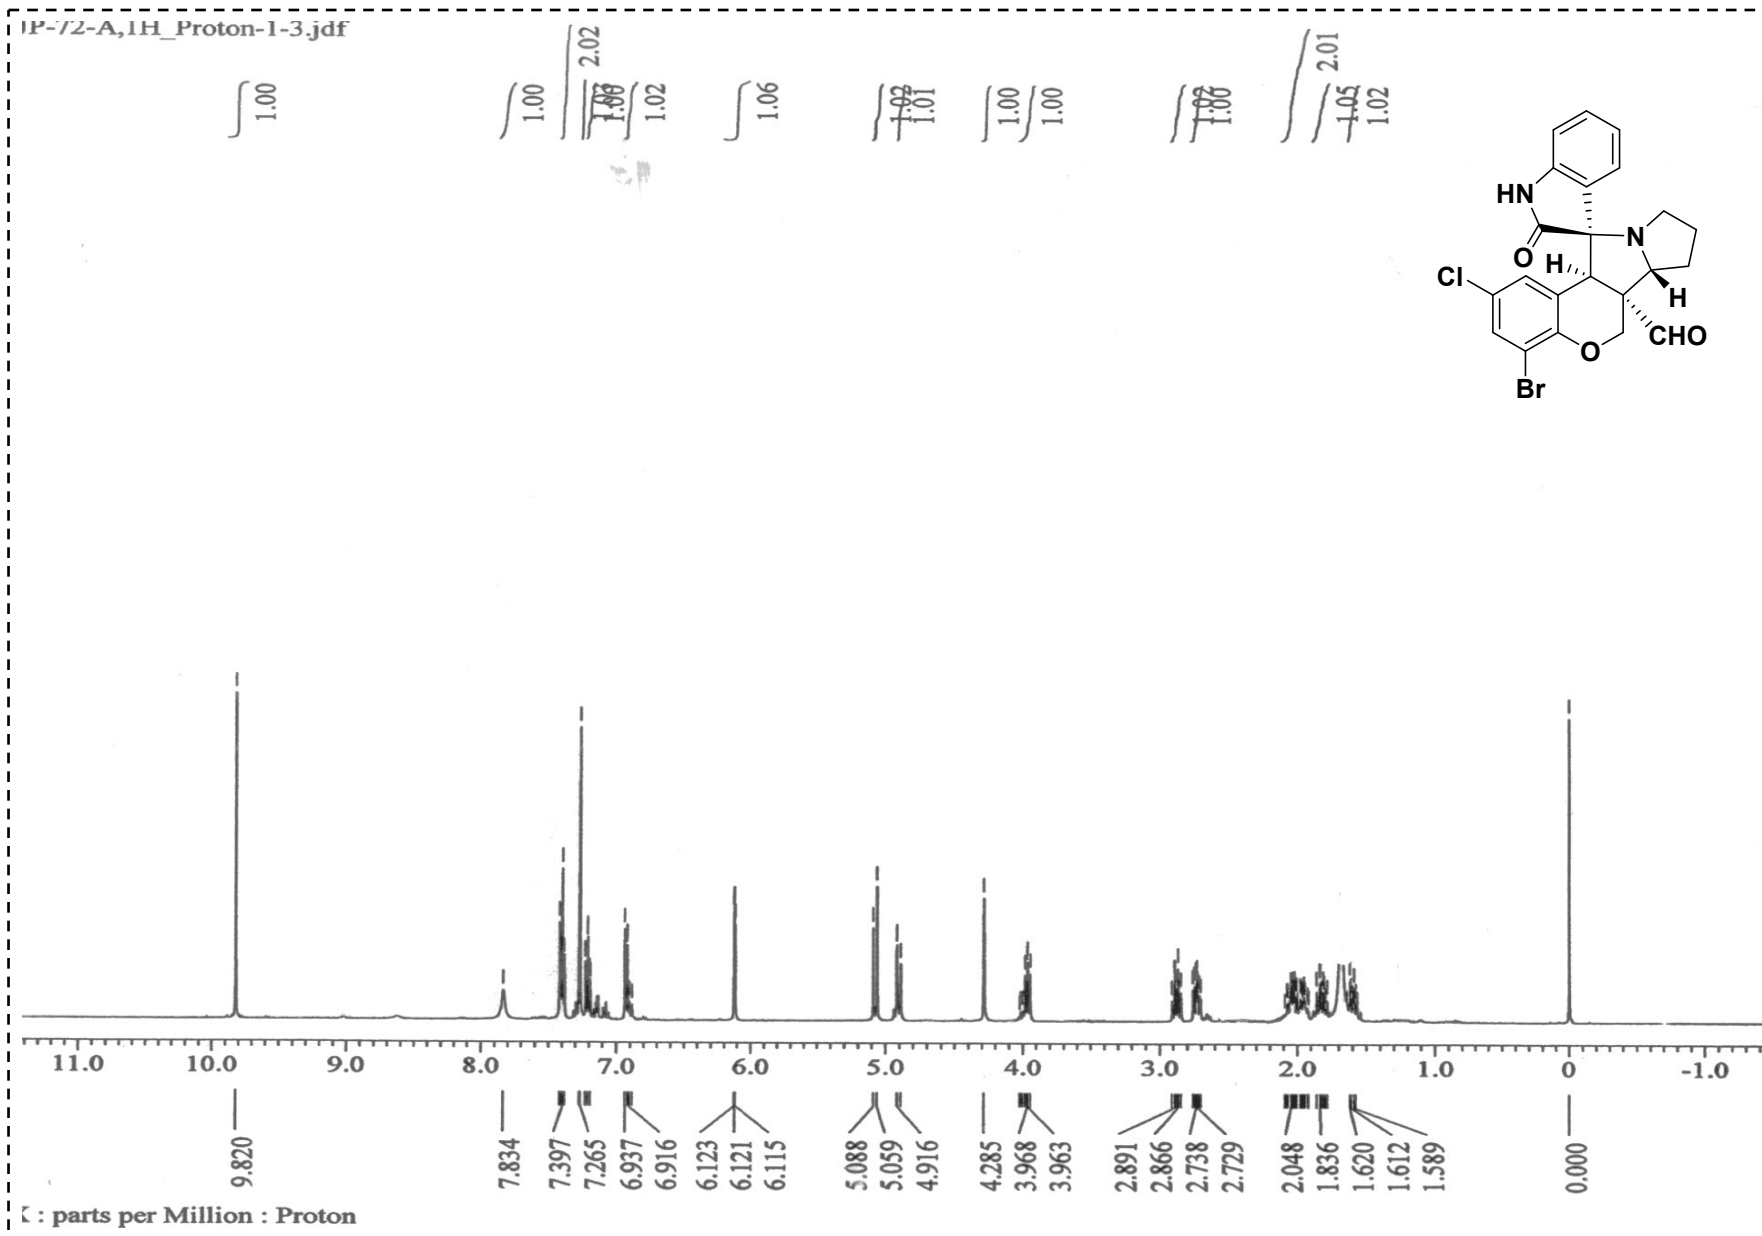

Fig S25. <sup>1</sup>H NMR spectrum of compound 16i in CDCl<sub>3</sub>

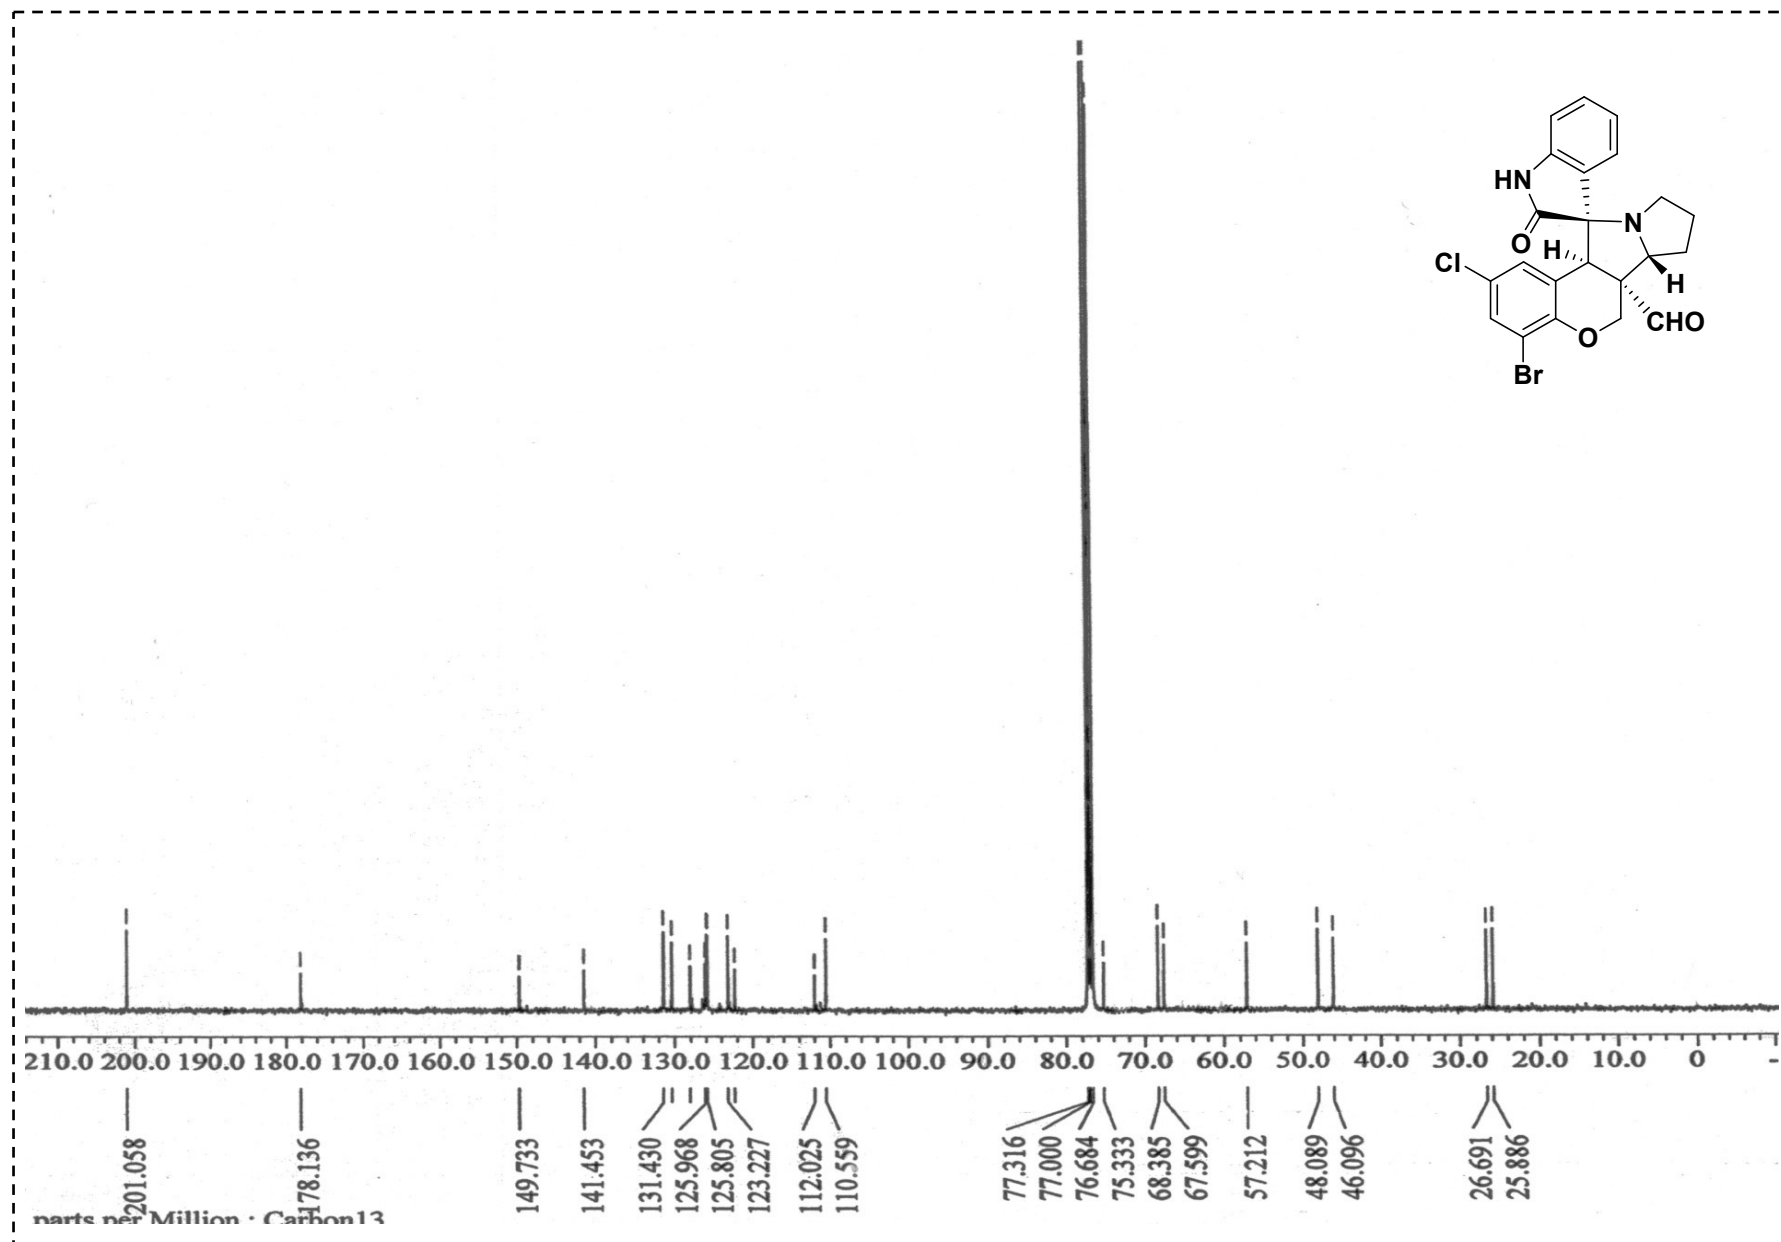

Fig S26.  $^{13}\text{C}$  NMR spectrum of compound 16i in  $\text{CDCl}_3$

BM

IISER BERHAMPUR  
CAIF HRMS FACILITY  
XEVO-G2XSQTOF#YFA1829

25-Dec-2021 23:49:10

JP-72 3 (0.079)

1: TOF MS ES+  
6.24e6

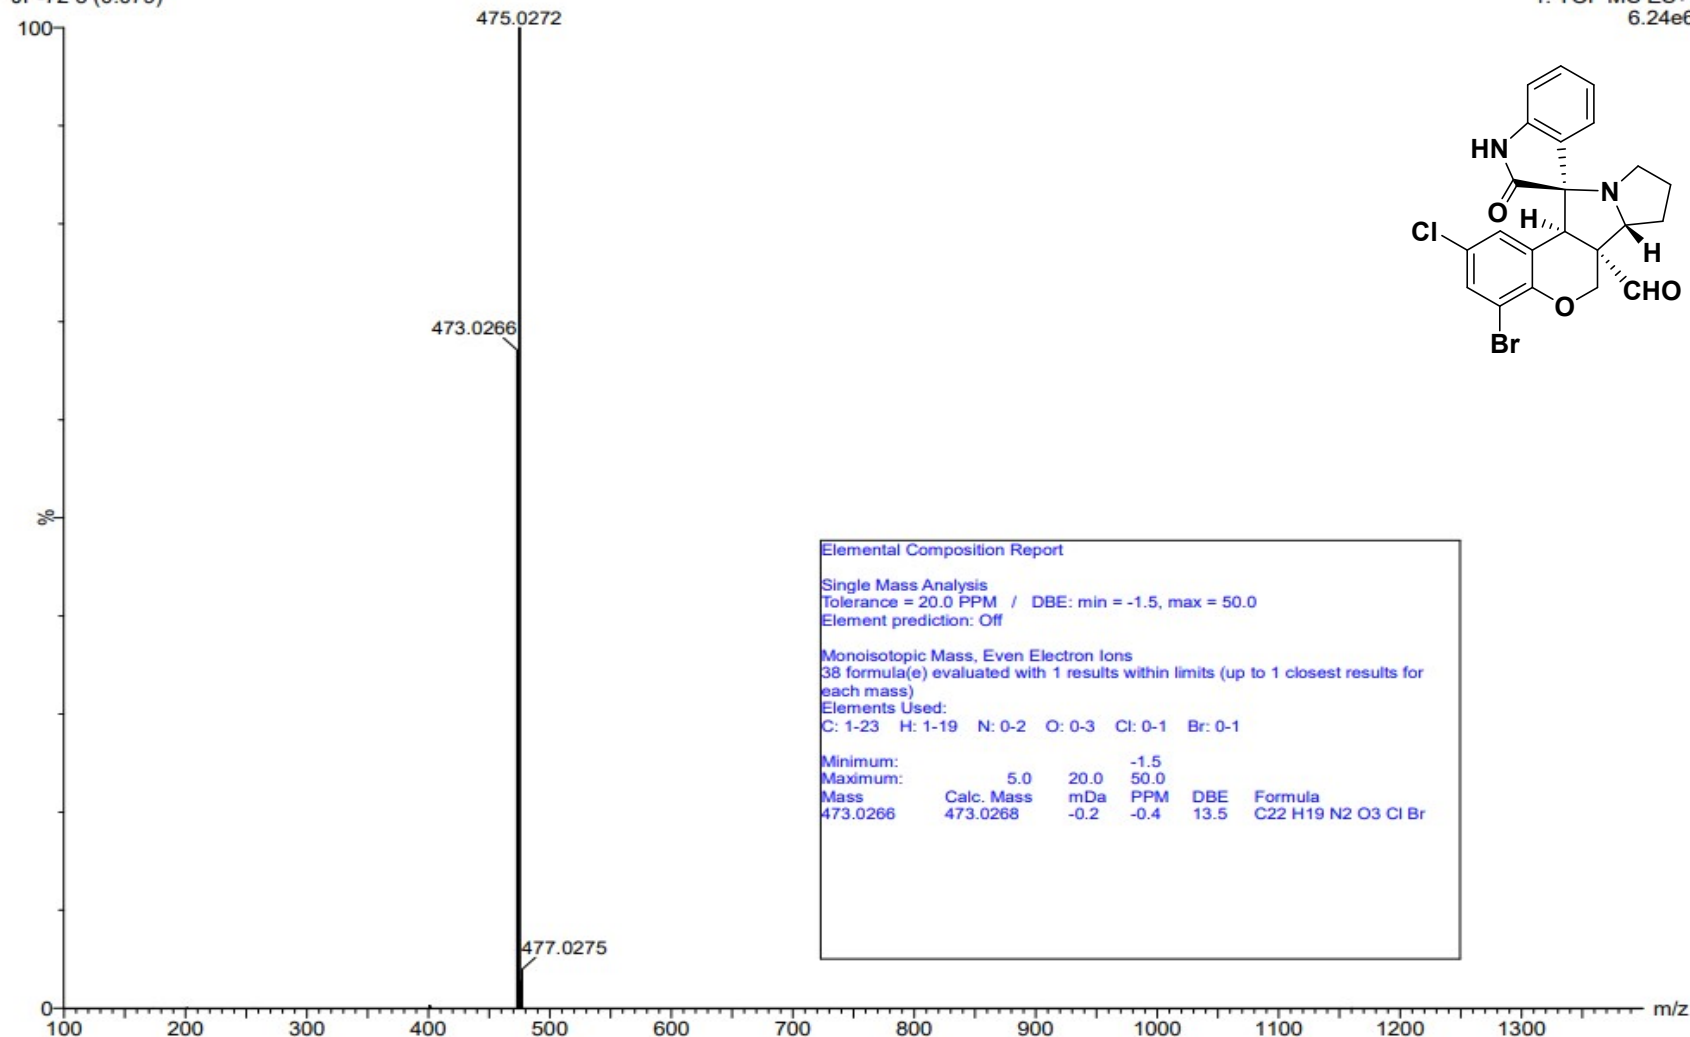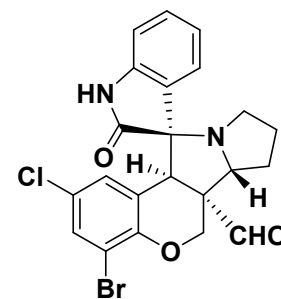

Fig S27. HRMS of compound 16i

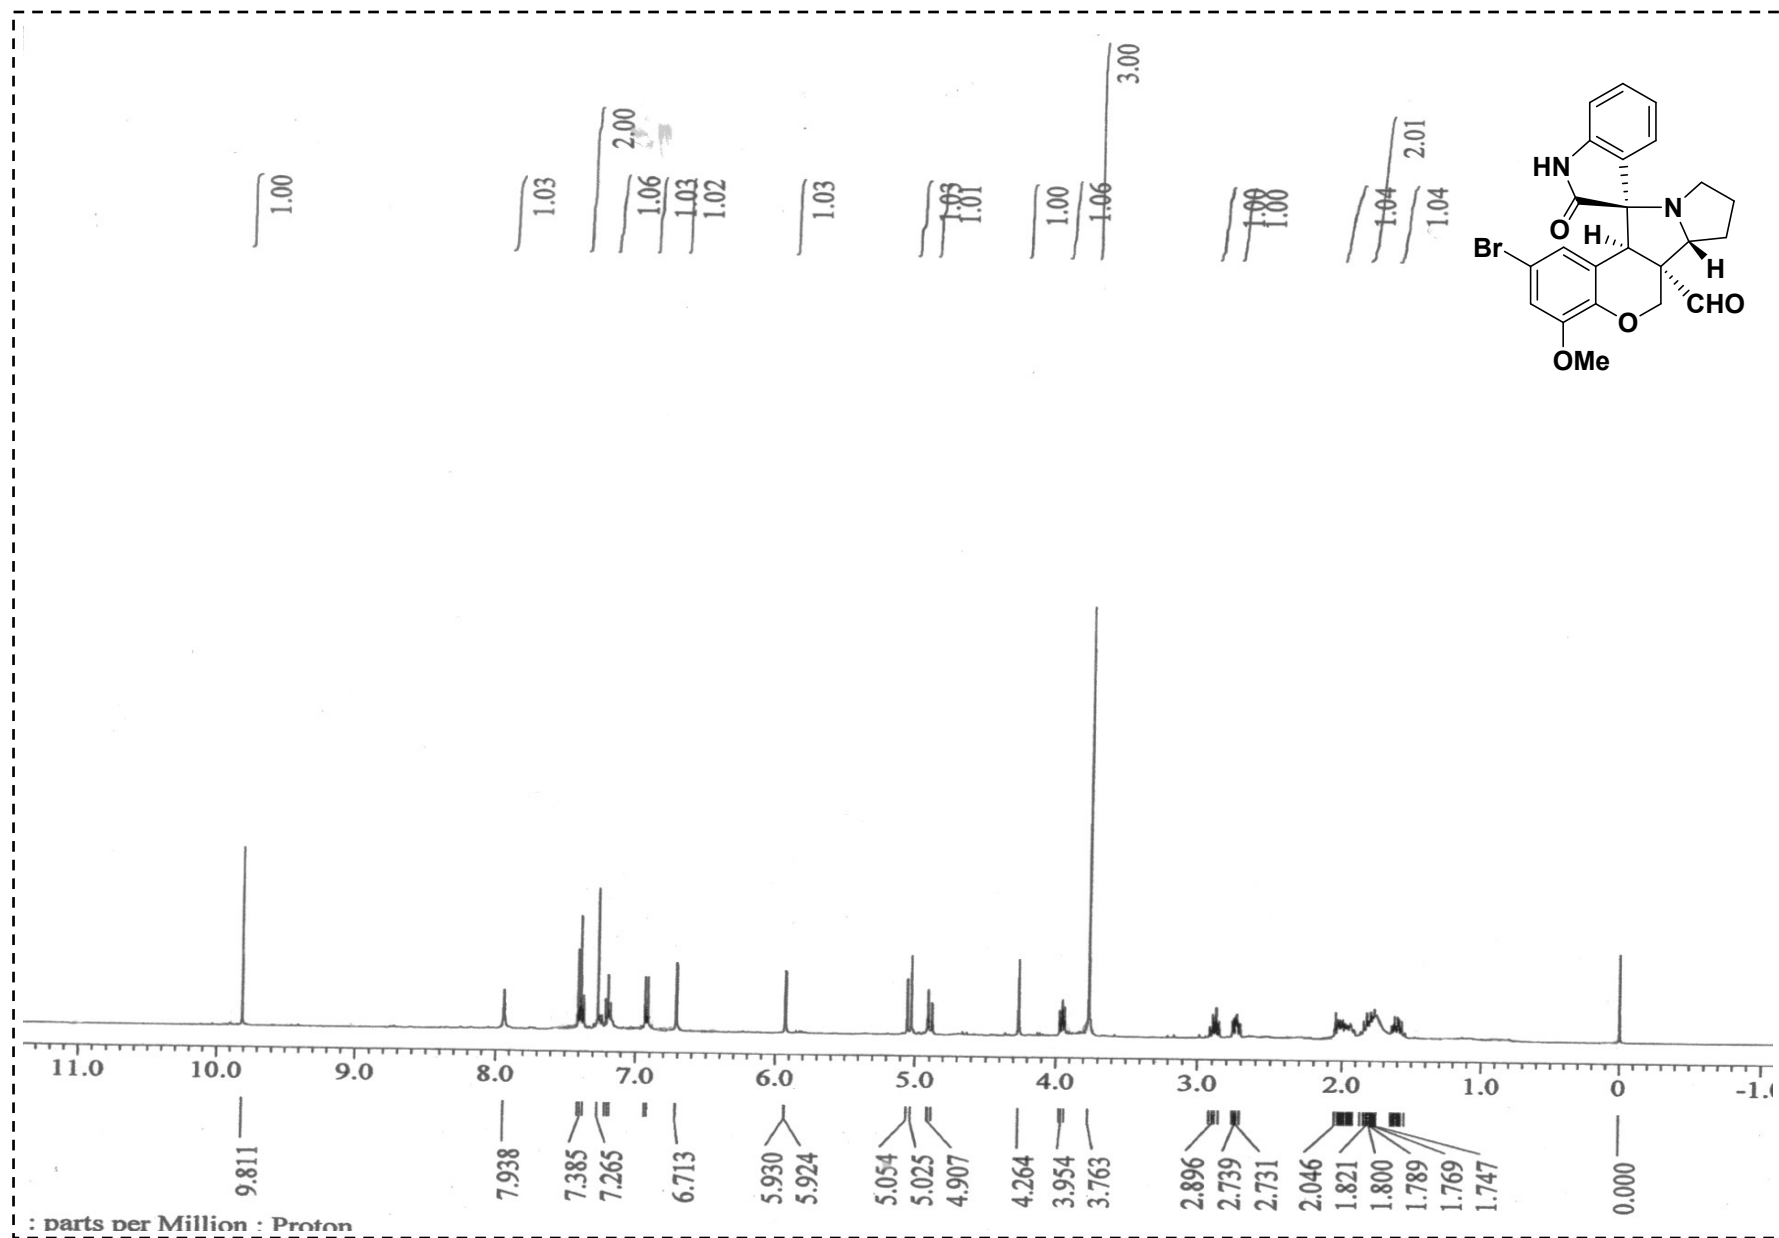

Fig S28. <sup>1</sup>H NMR spectrum of compound 16j in CDCl<sub>3</sub>

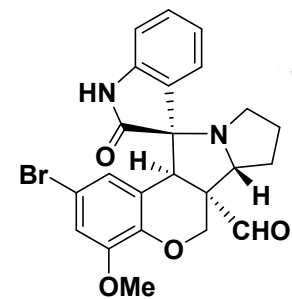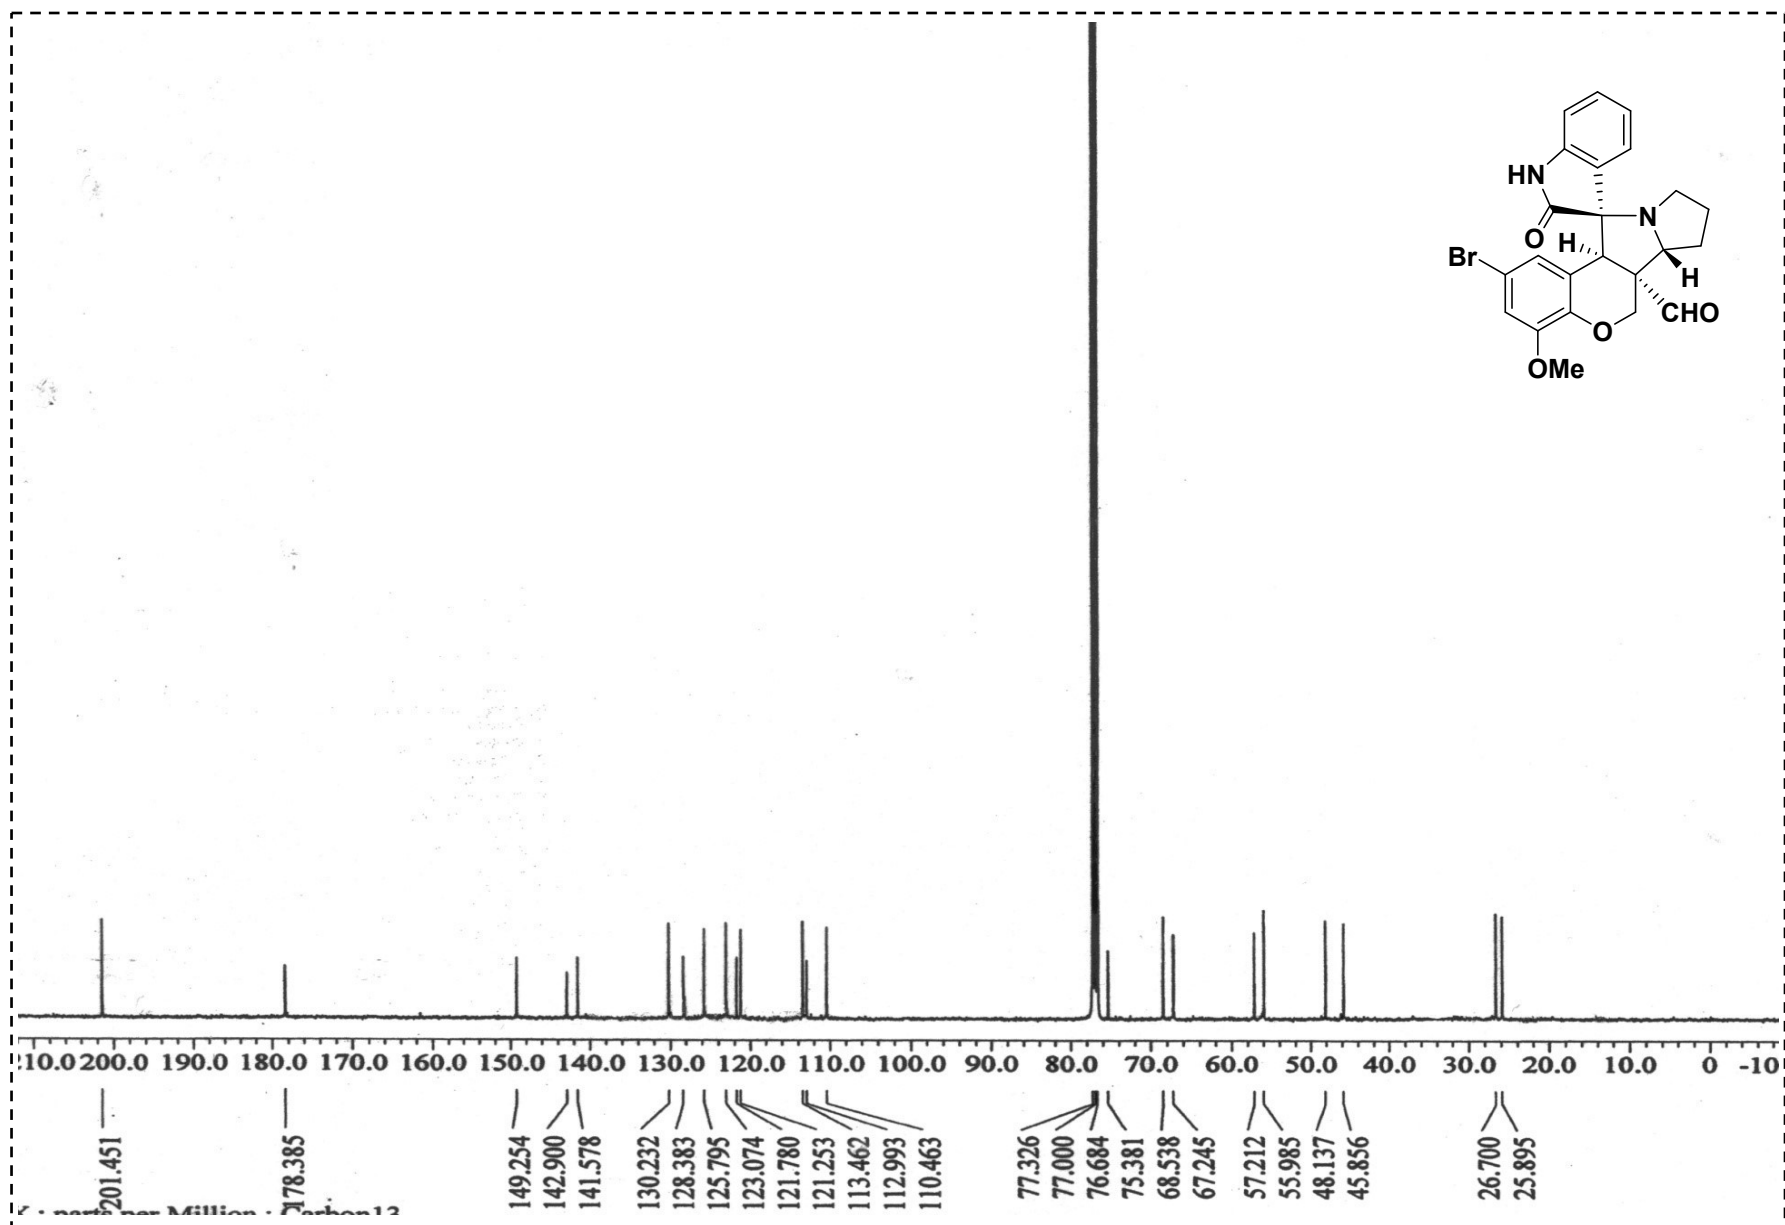

Fig S29. <sup>13</sup>C NMR spectrum of compound 16j in CDCl<sub>3</sub>

BM

IISER BERHAMPUR  
CAIF HRMS FACILITY  
XEVO-G2XSQTOF#YFA1829

25-Dec-2021 22:43:14

JP-48 29 (0.553)

100

469.0769

%

0

100

200

300

400

500

600

700

800

900

1000

1100

1200

1300

m/z

1: TOF MS ES+  
4.00e5

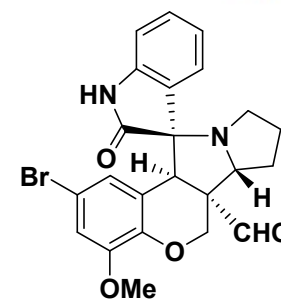

#### Elemental Composition Report

##### Single Mass Analysis

Tolerance = 20.0 PPM / DBE: min = -1.5, max = 50.0

Element prediction: Off

##### Monoisotopic Mass, Even Electron Ions

25 formula(e) evaluated with 1 results within limits (up to 1 closest results for each mass)

##### Elements Used:

C: 1-23 H: 1-22 N: 0-2 O: 0-4 Br: 0-1

Minimum:

Maximum: 5.0 20.0 -1.5

Mass Calc. Mass mDa PPM DBE Formula

469.0769 469.0763 0.6 1.3 13.5 C23 H22 N2 O4 Br

Fig 30. HRMS of compound 16j

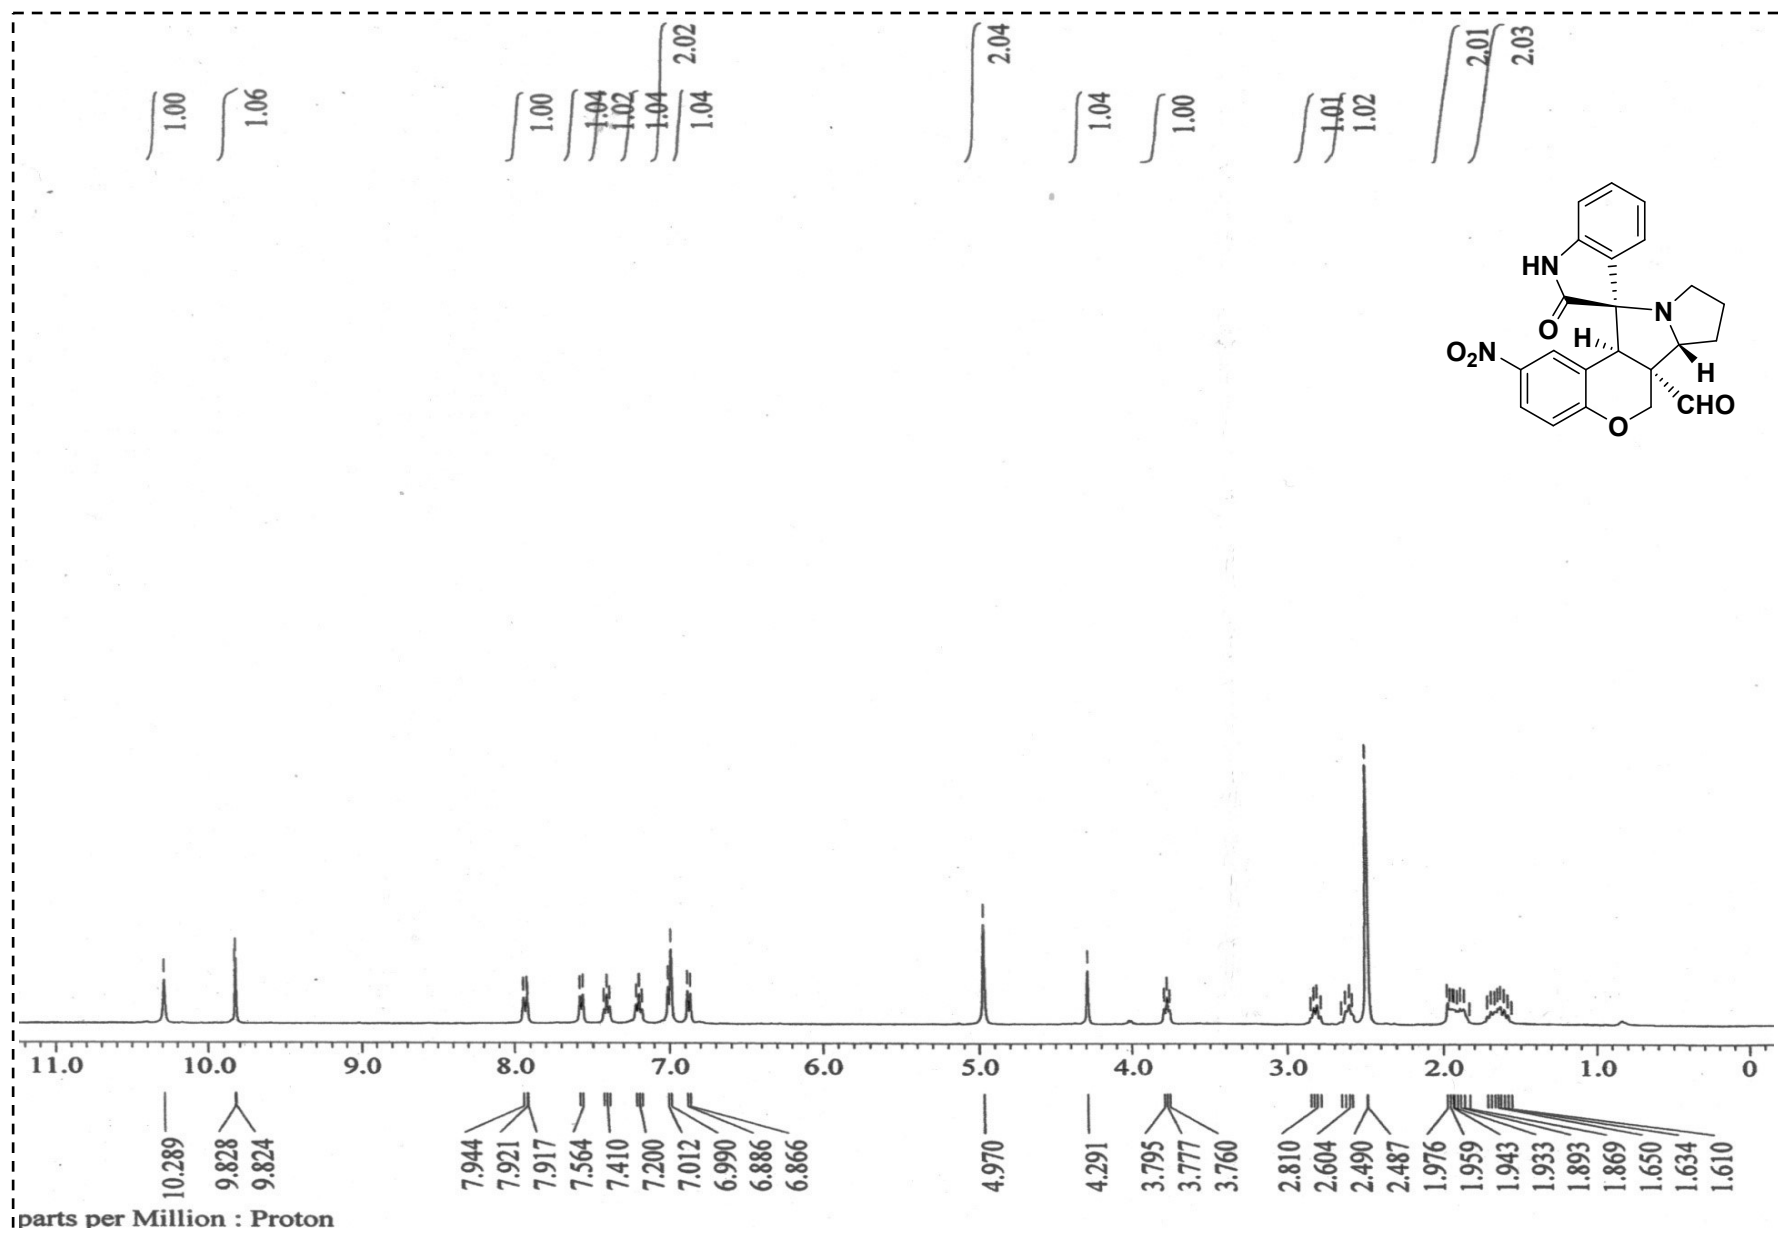

Fig S31. <sup>1</sup>H NMR spectrum of compound 16k in DMSO-d<sub>6</sub>



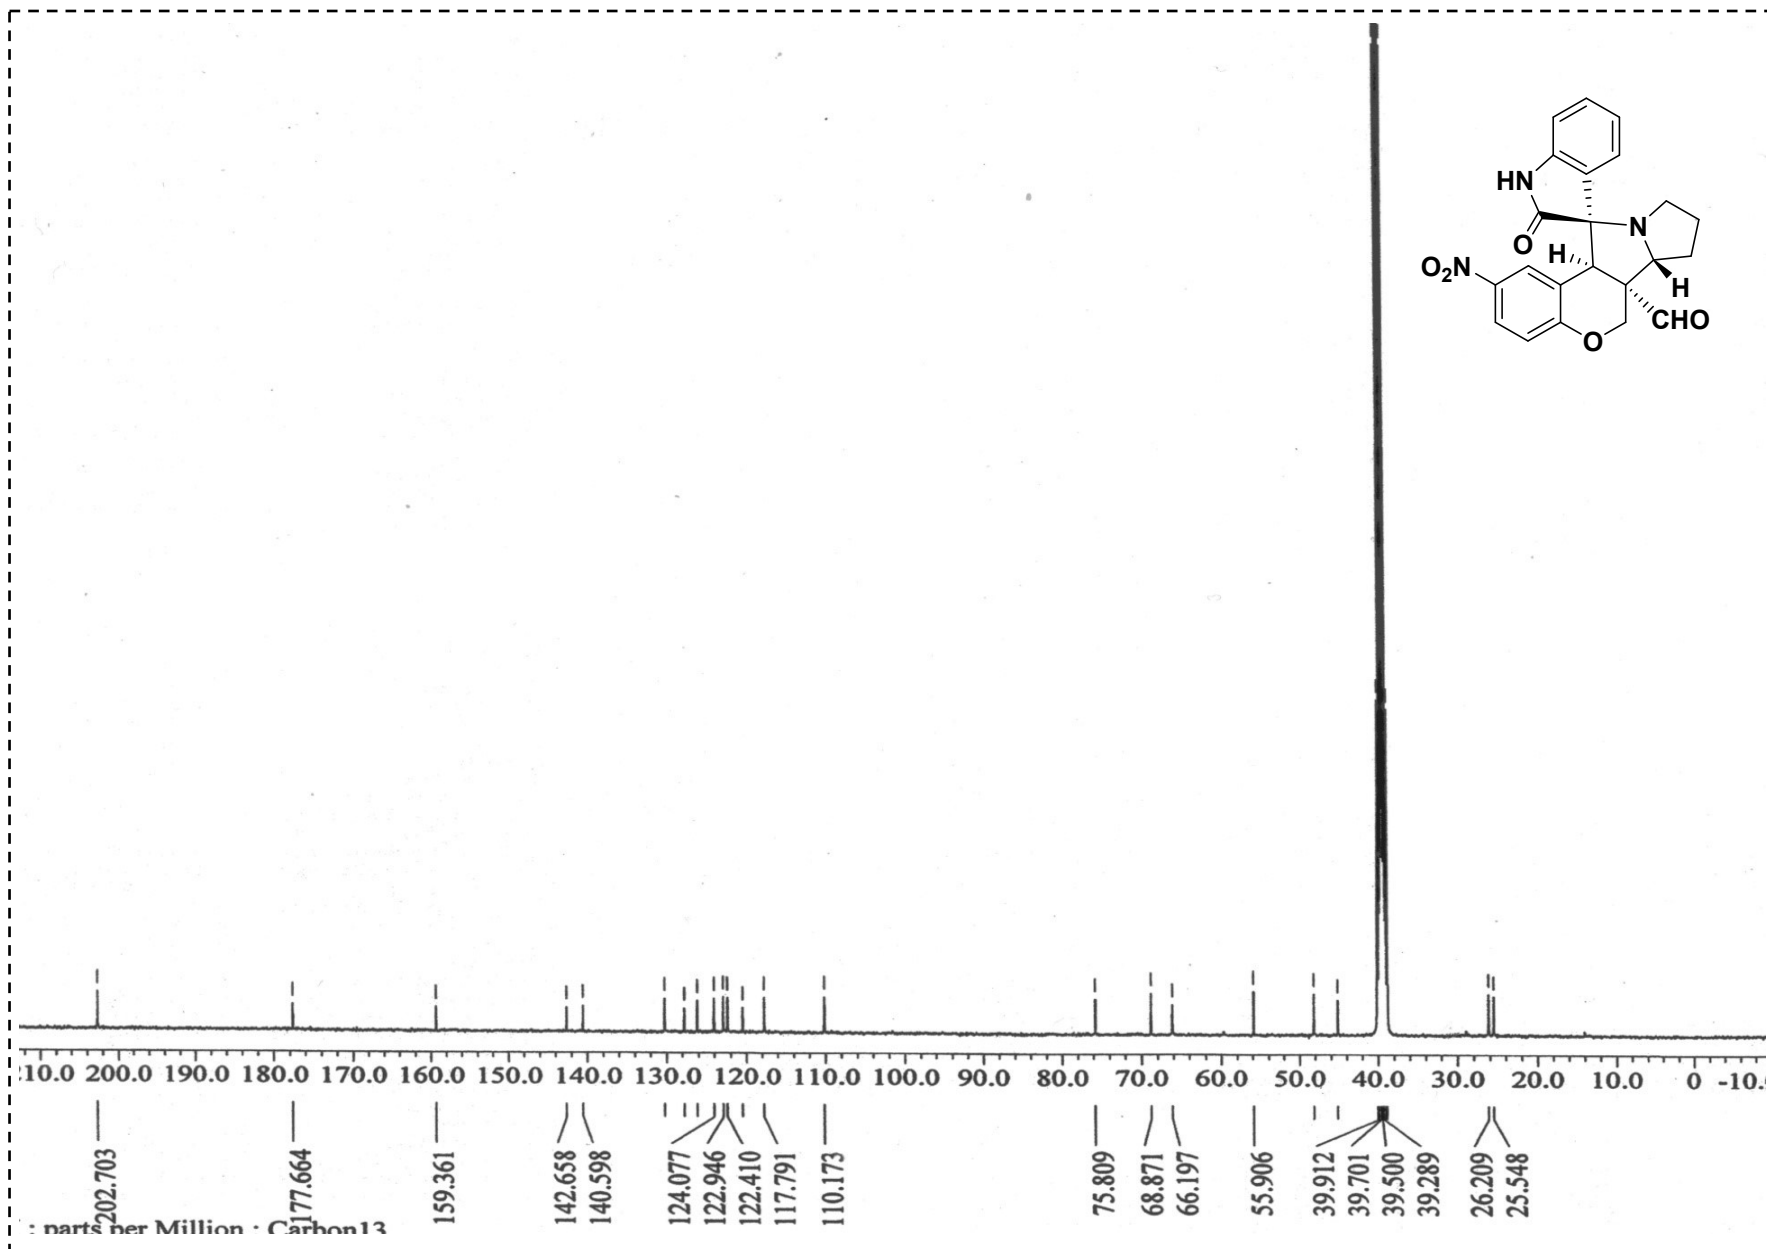

Fig S32. <sup>13</sup>C NMR spectrum of compound 16k in DMSO-d<sub>6</sub>

BM

IISER BERHAMPUR  
CAIF HRMS FACILITY  
XEVO-G2XSQTOF#YFA1829

16-May-2022 13:03:42

JP-226-1 6 (0.130)

1: TOF MS ES+  
7.22e5

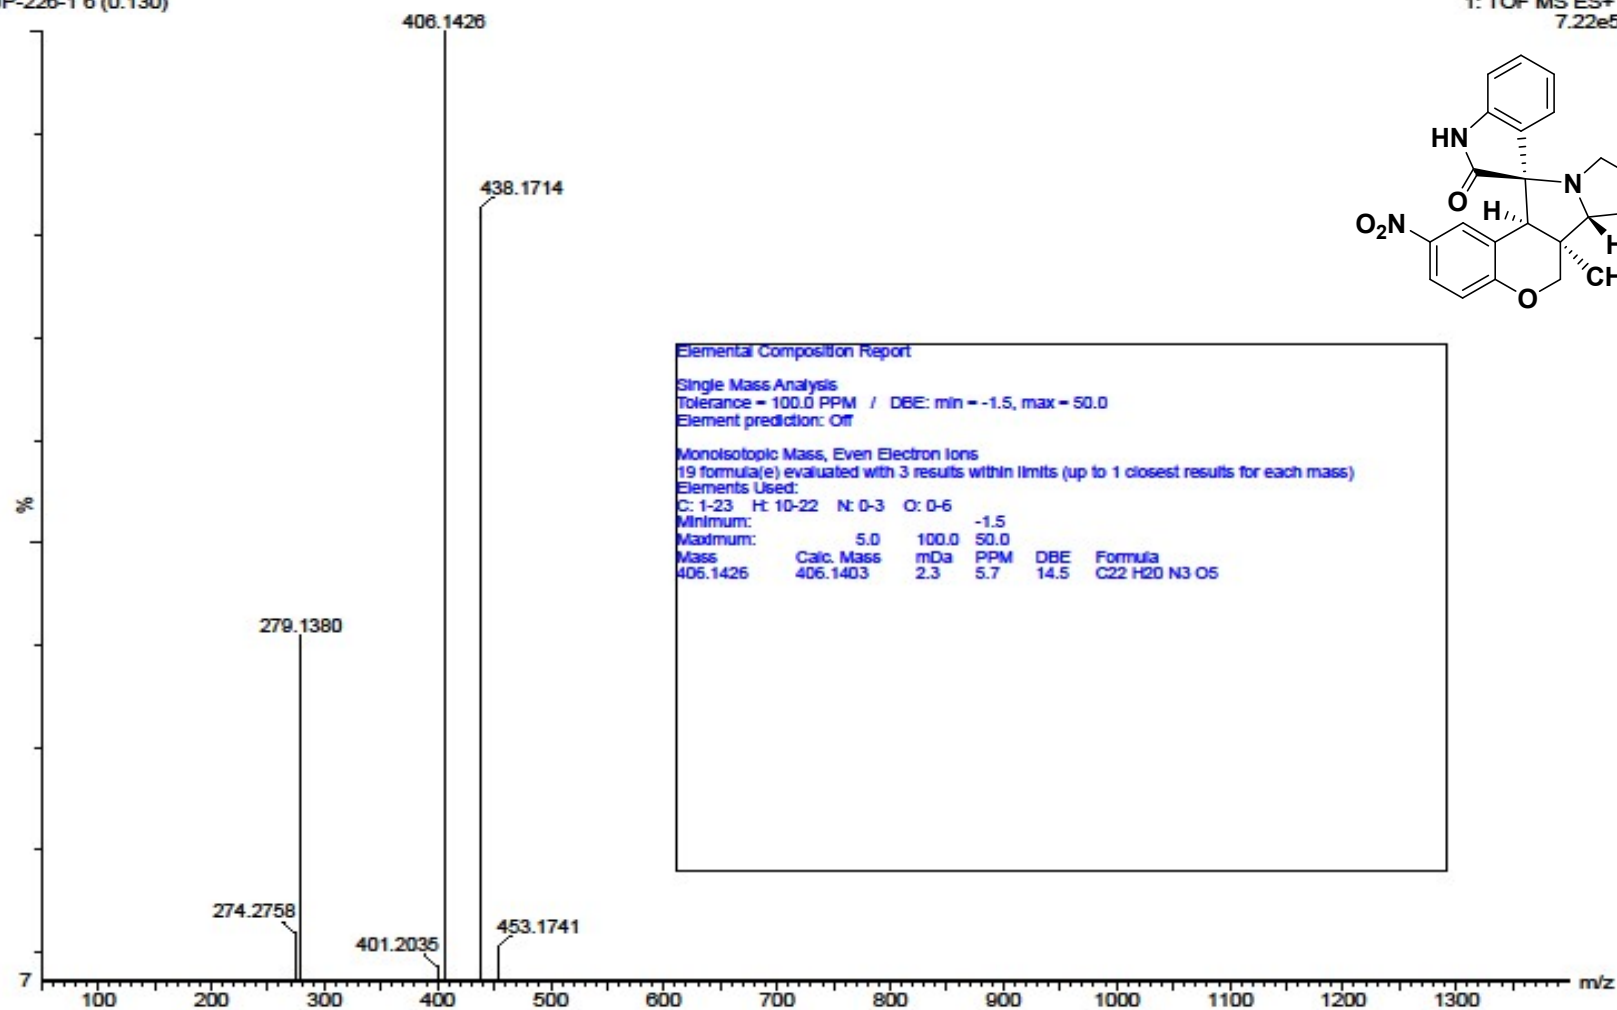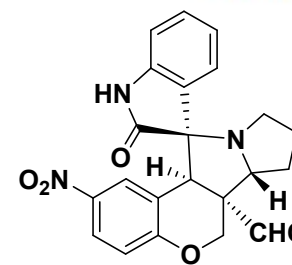

Fig S33. HRMS of compound 16k

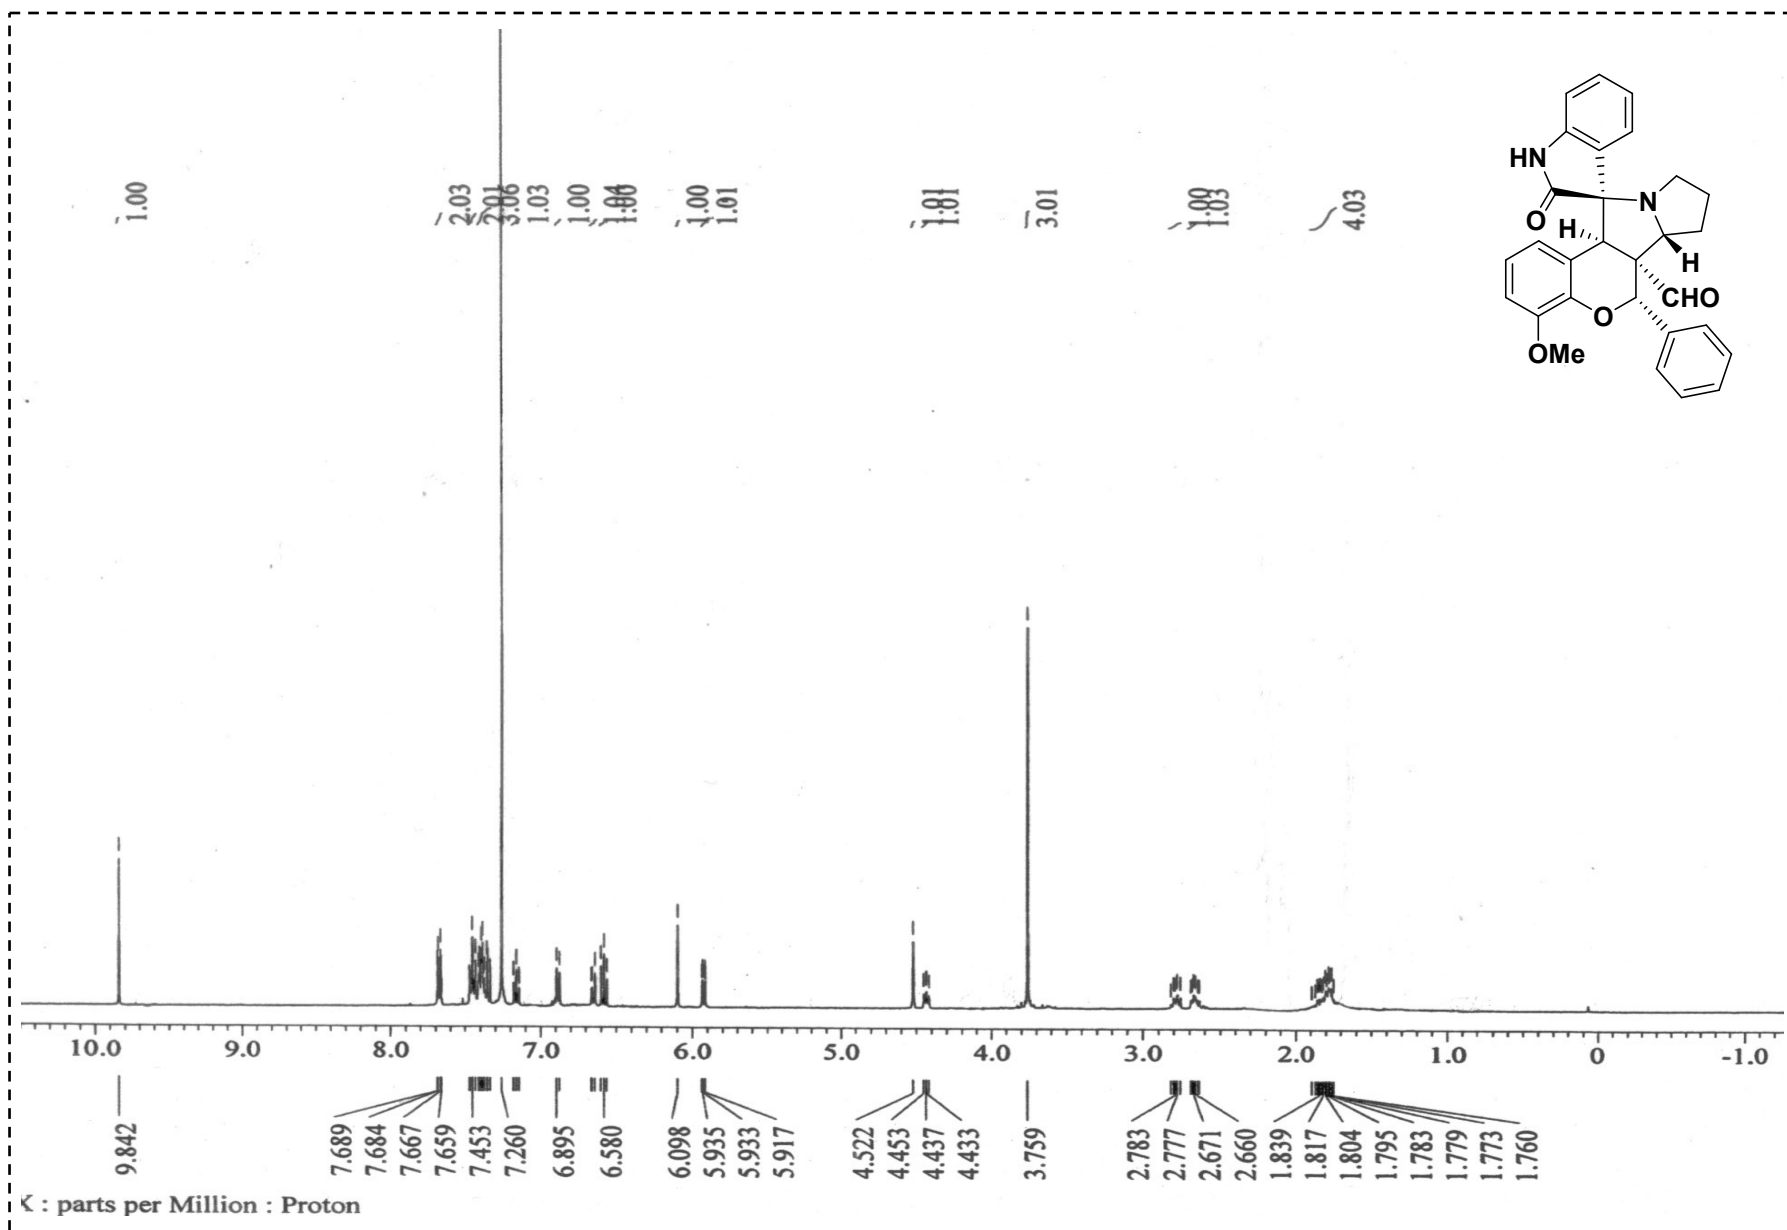

Fig S34.  $^1\text{H}$  NMR spectrum of compound **16'a** in CDCl<sub>3</sub>

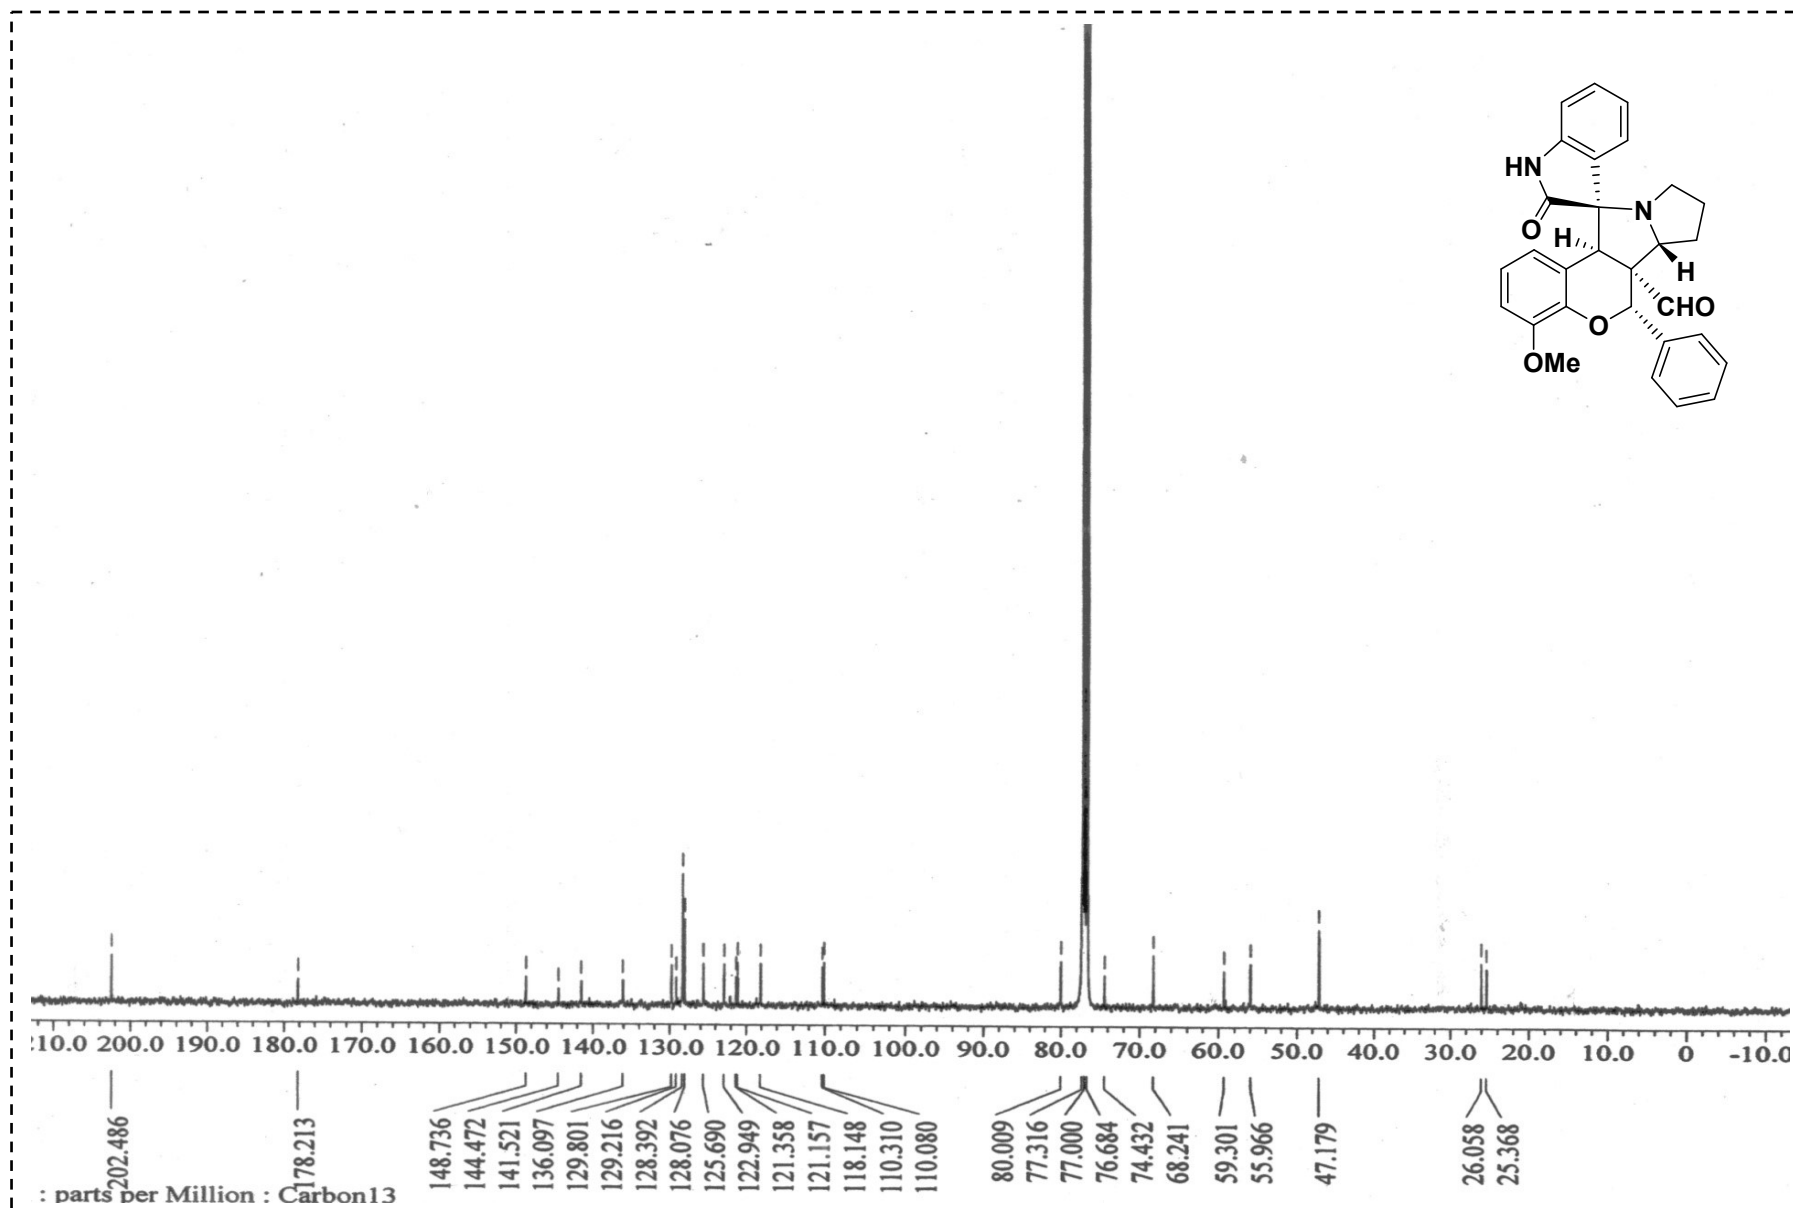

Fig S35. <sup>13</sup>C NMR spectrum of compound 16'a in CDCl<sub>3</sub>

BM

IISER BERHAMPUR  
CAIF HRMS FACILITY  
XEVO-G2XSQTOF#YFA1829

27-Jun-2022 19:33:19

JP-250 48 (0.897)

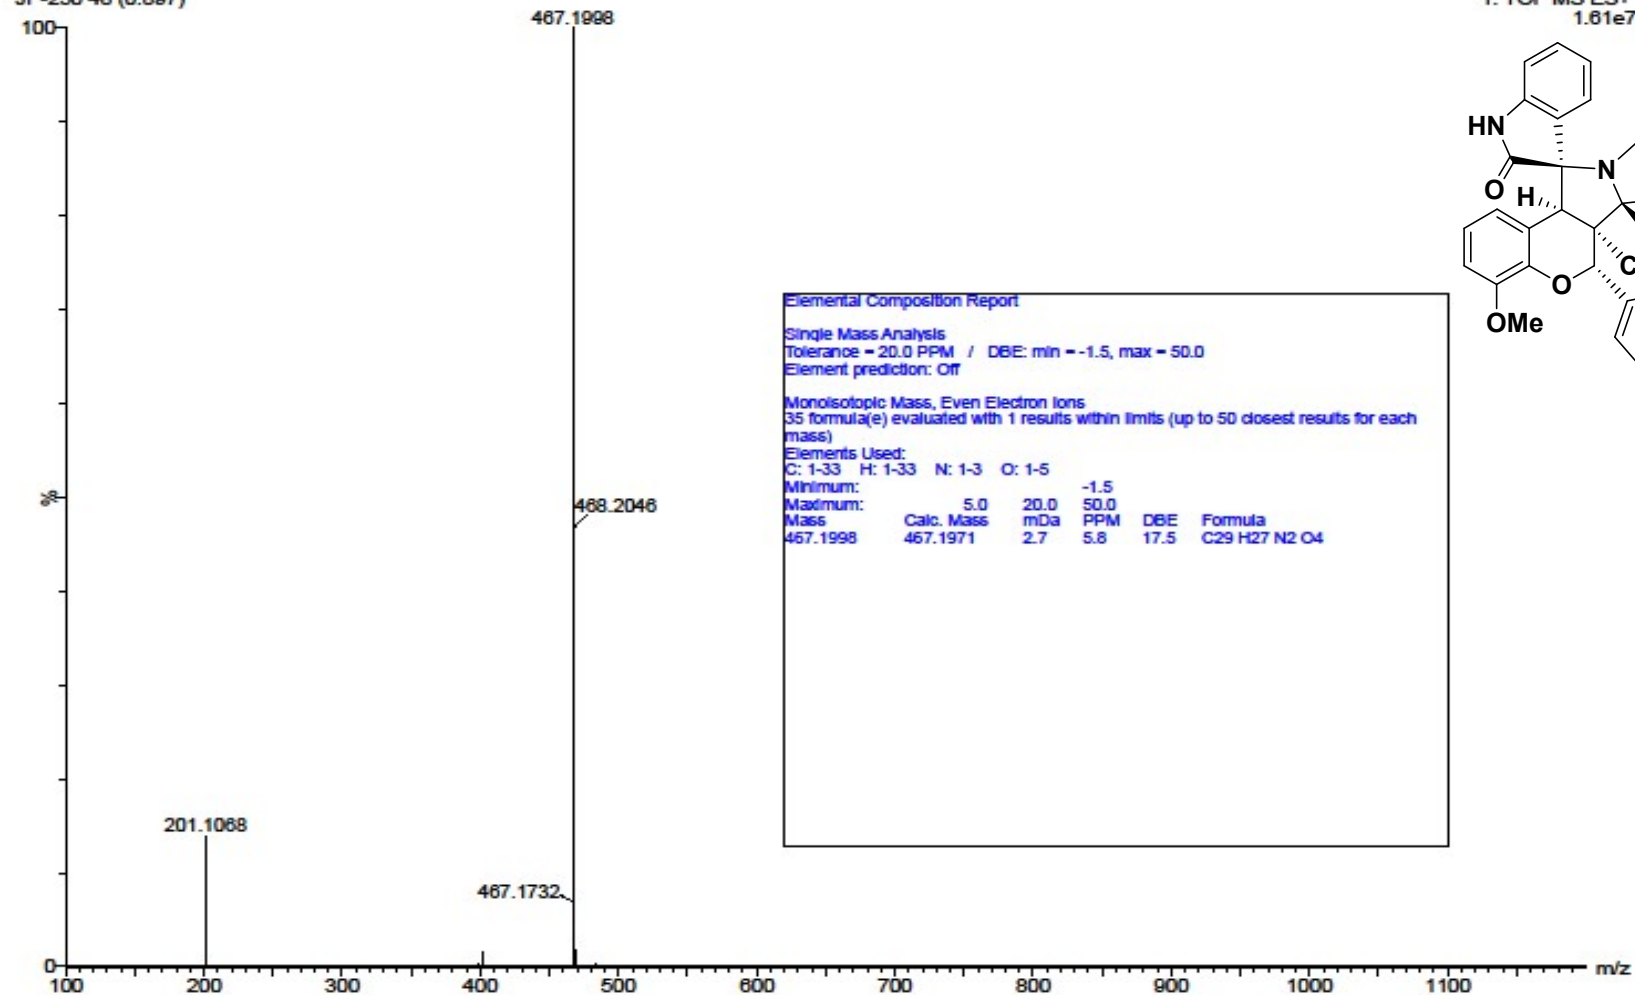

Fig S36. HRMS of compound 16'a

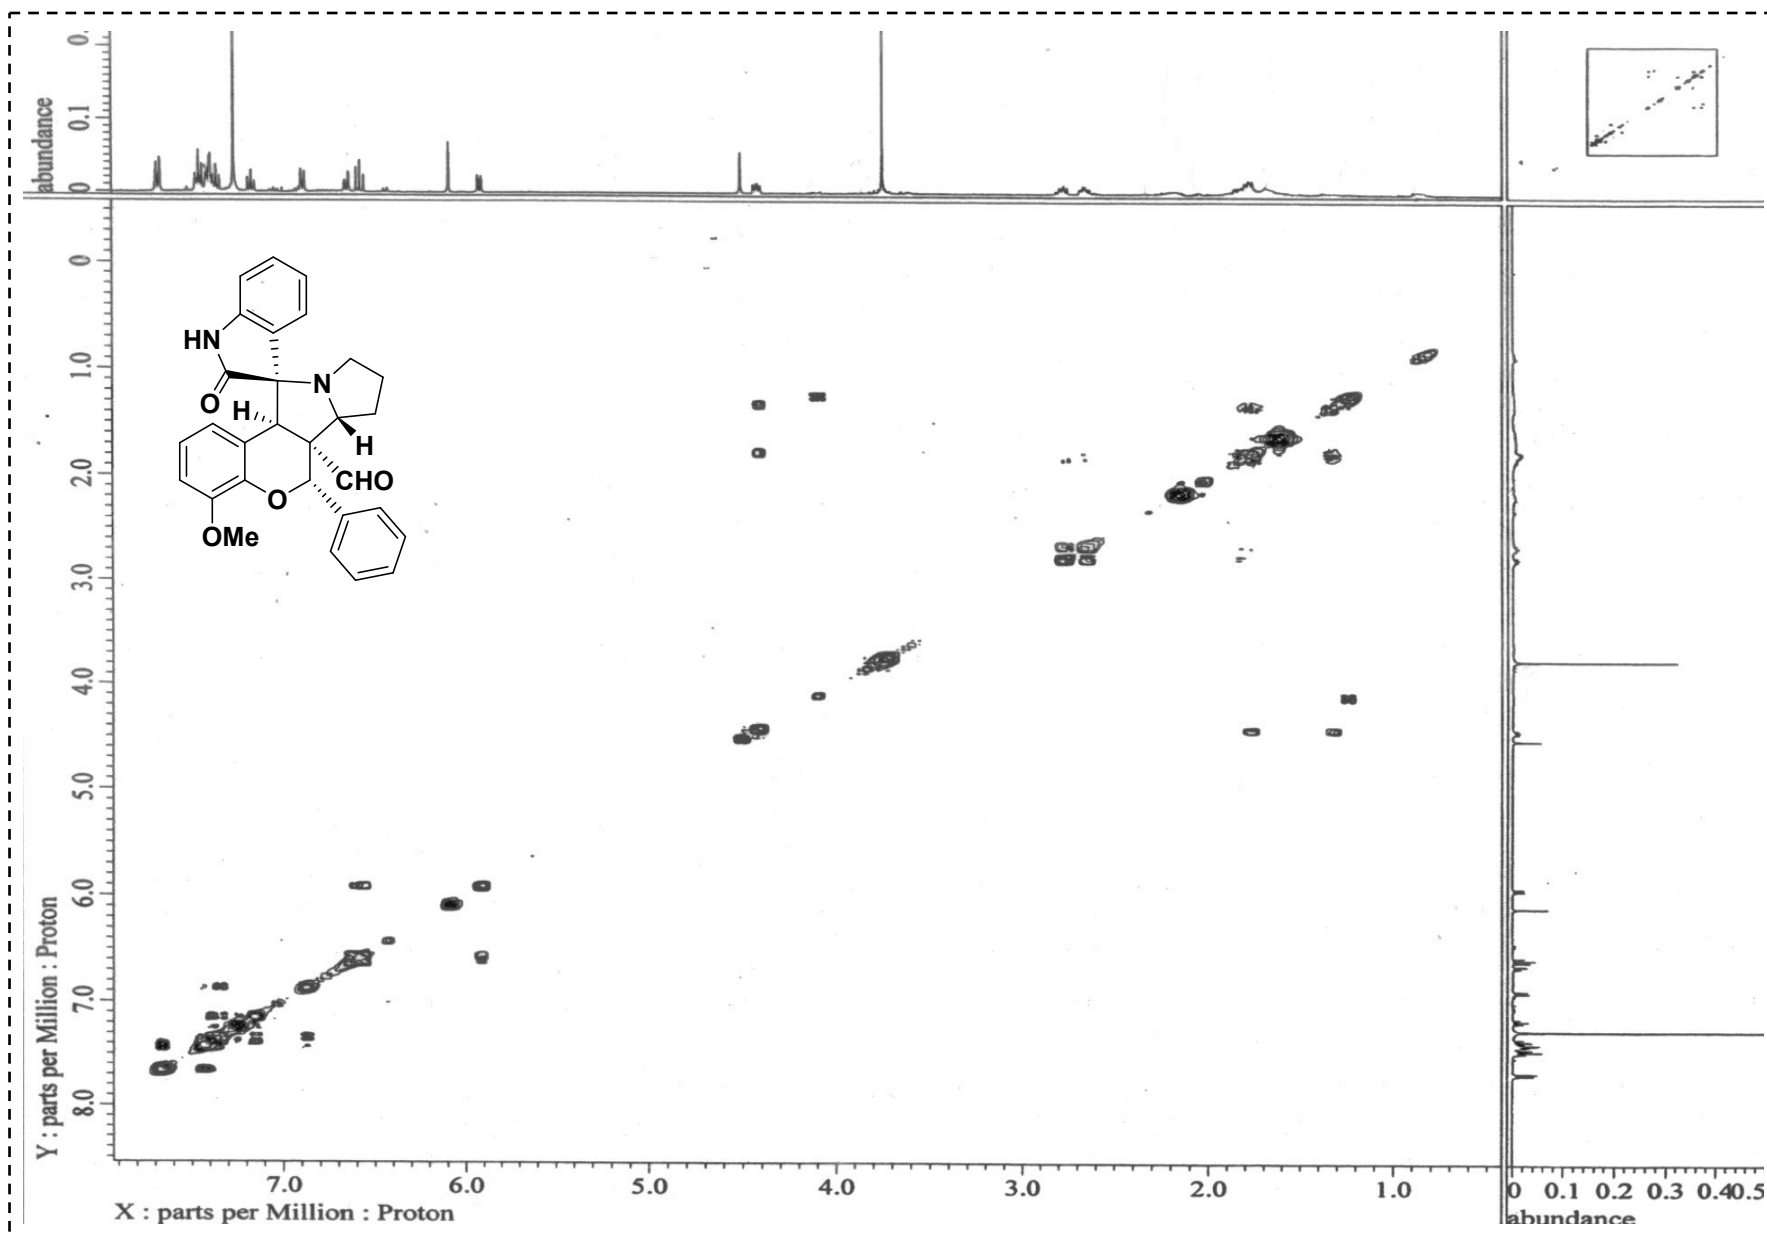

Fig S37. COSY Spectra of compound 16'a

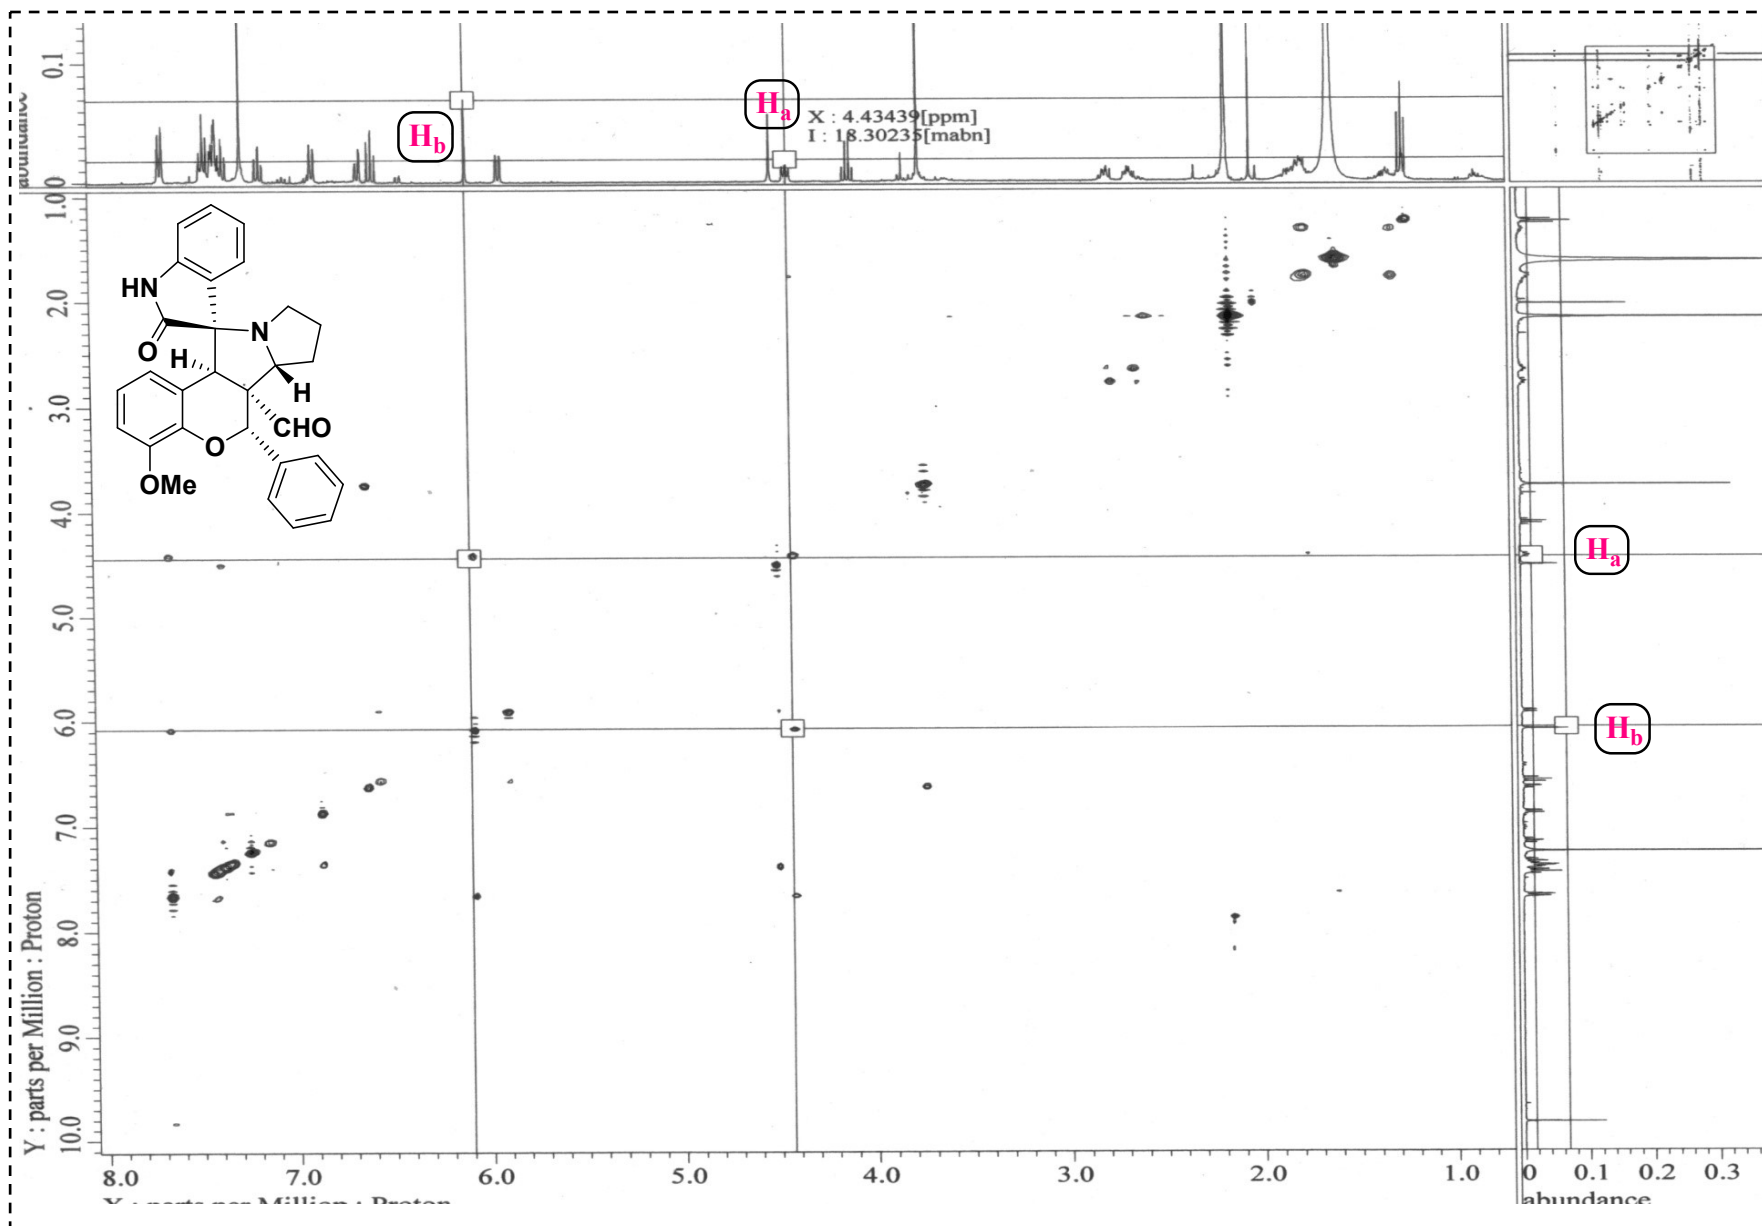

Fig S38. NOESY Spectra of compound 16'a

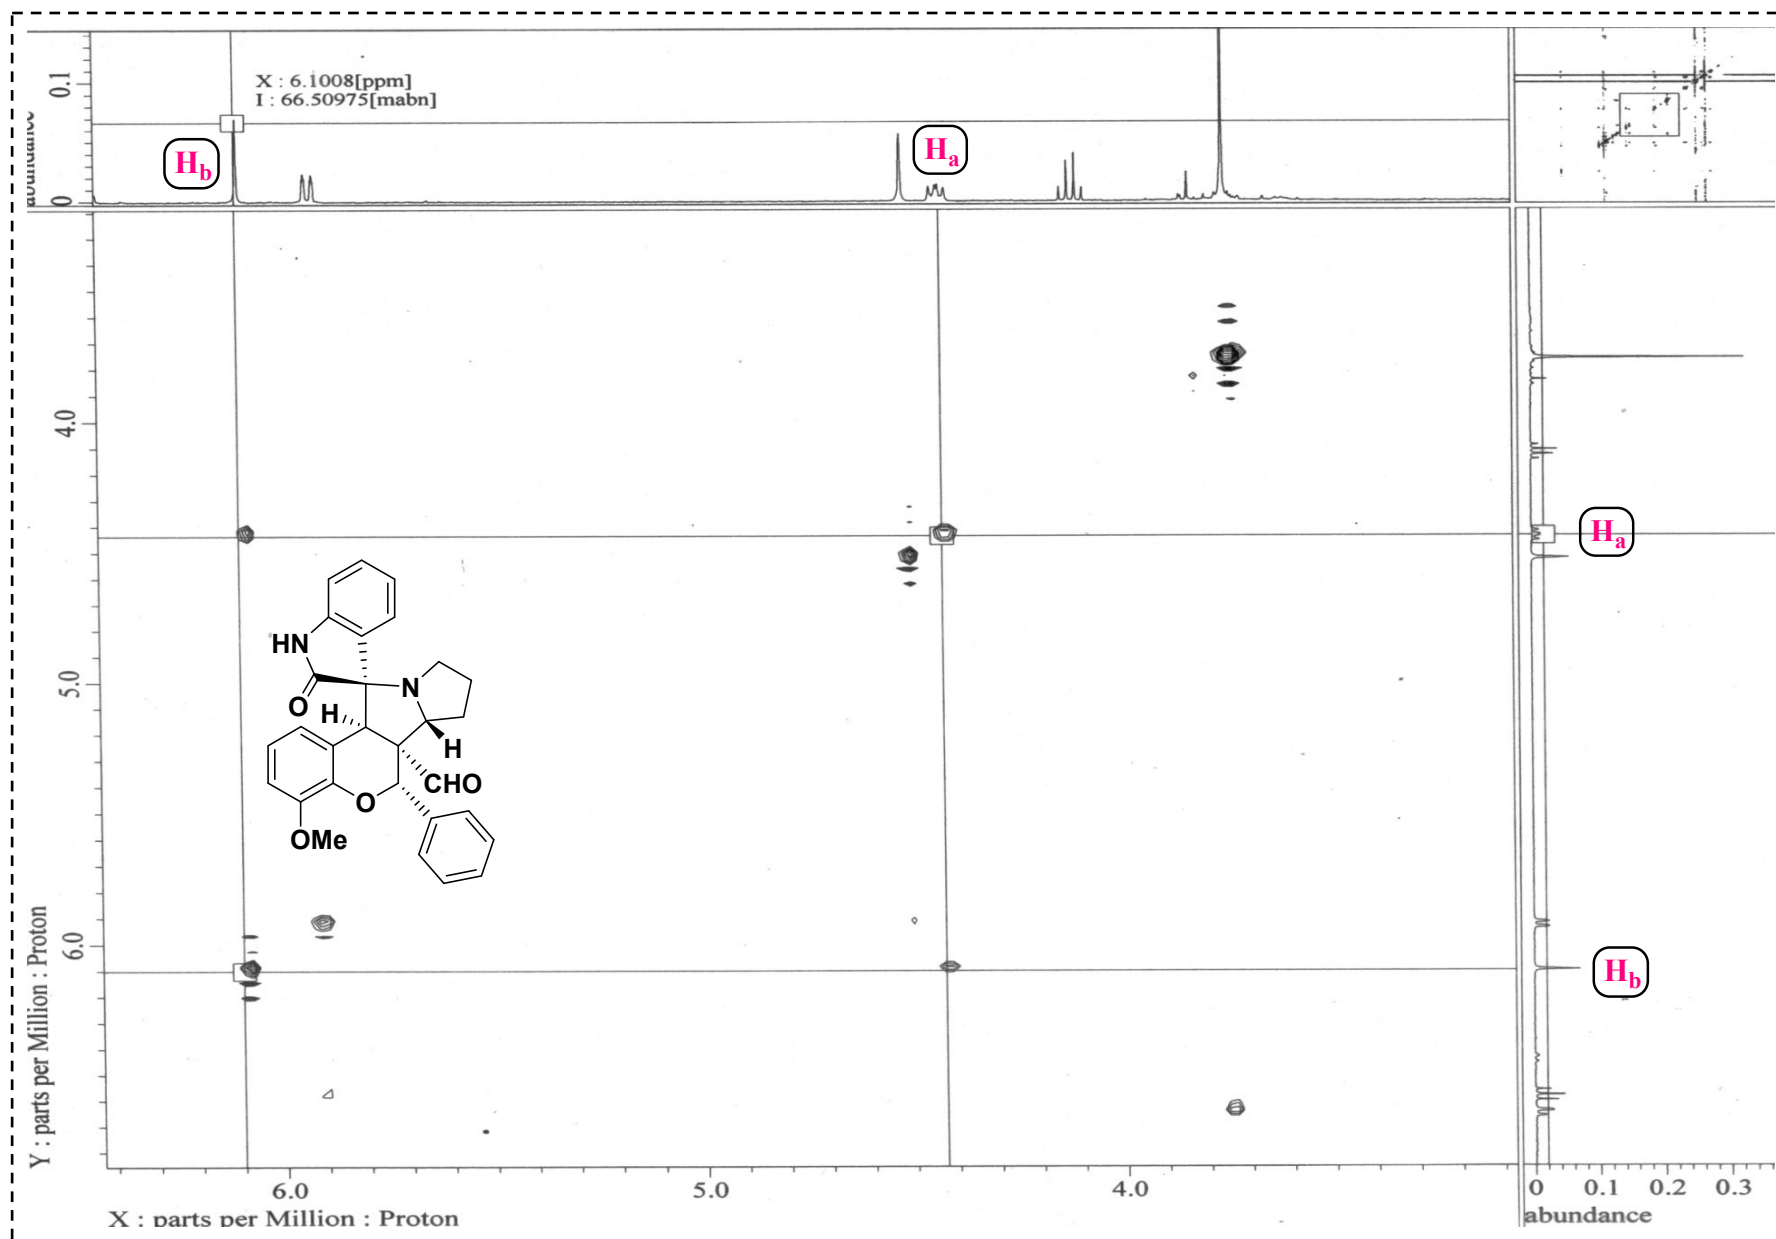

Fig S39. NOESY Expansion Spectra of compound 16'a



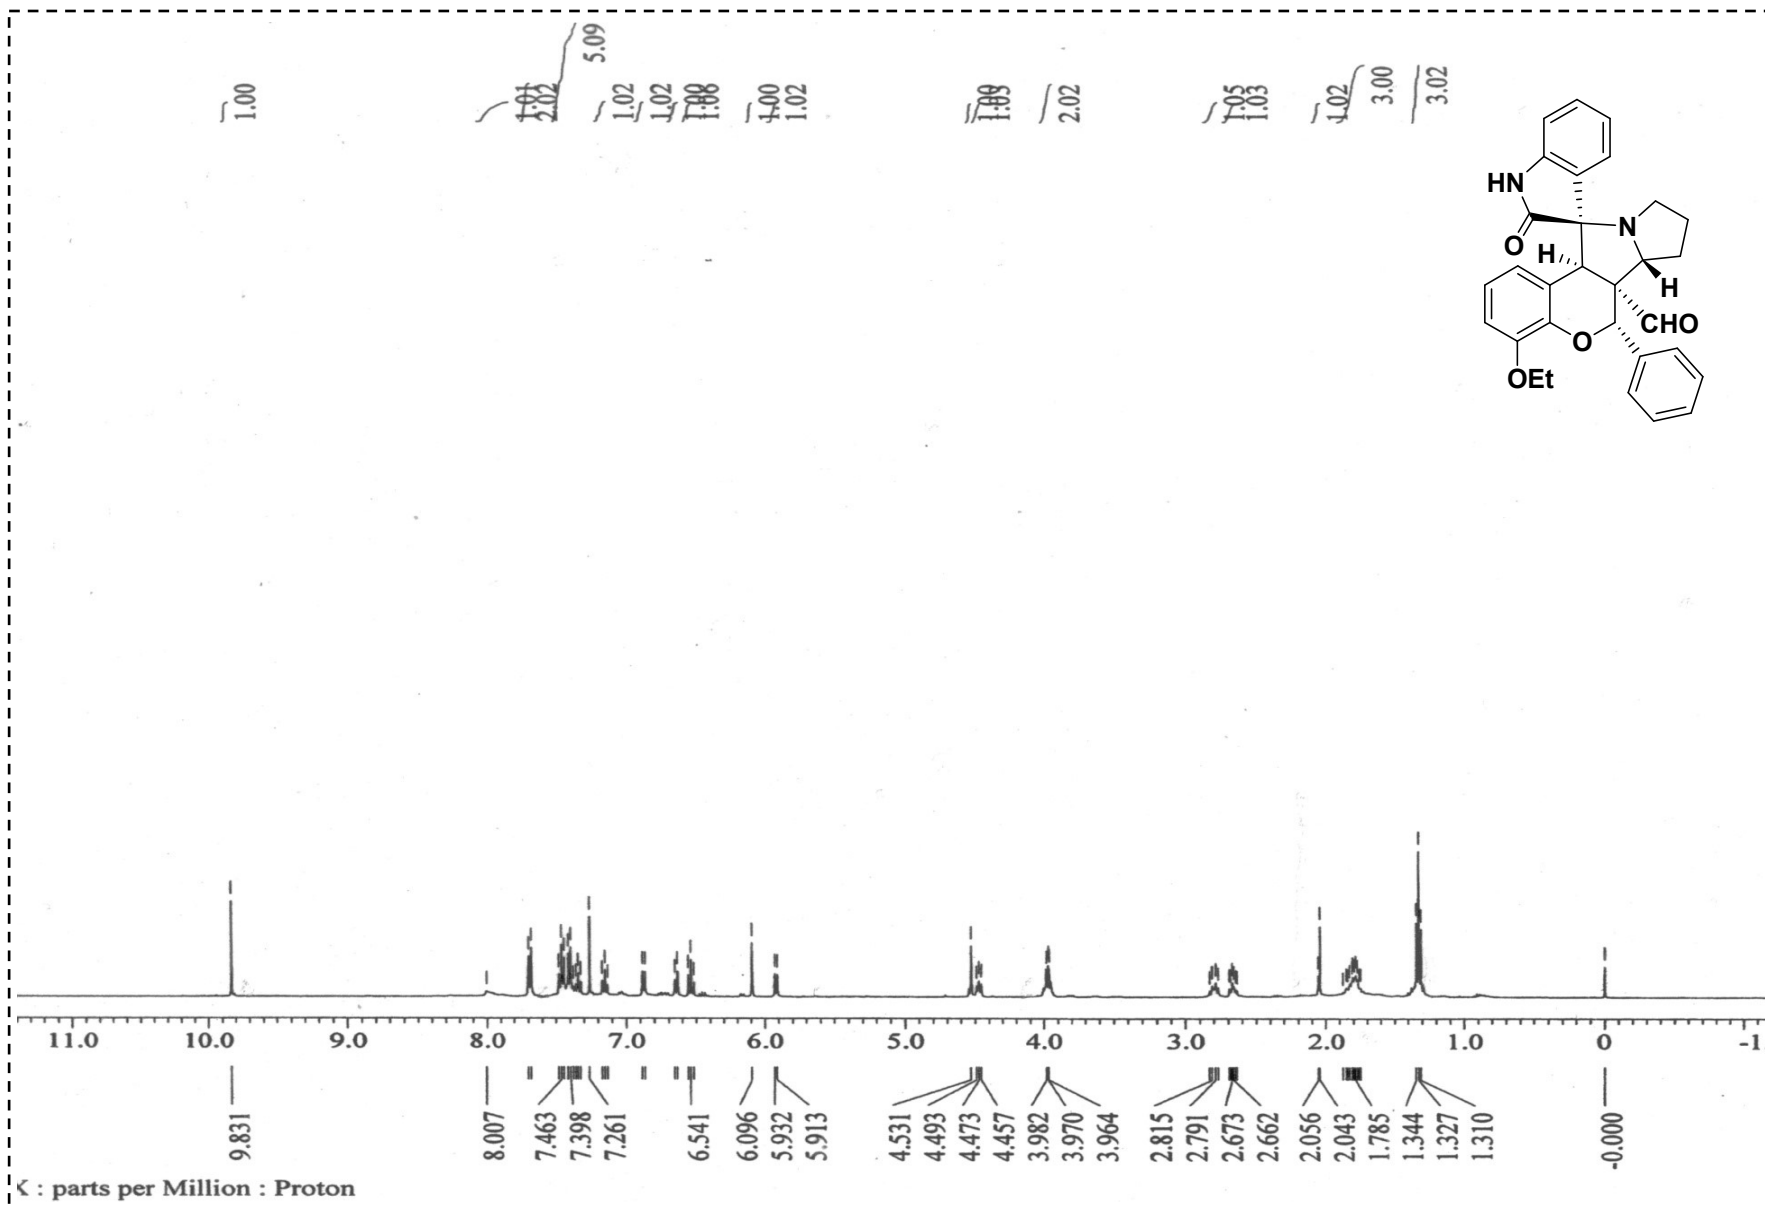

Fig S40.  $^1\text{H}$  NMR spectrum of compound **16'b** in  $\text{CDCl}_3$

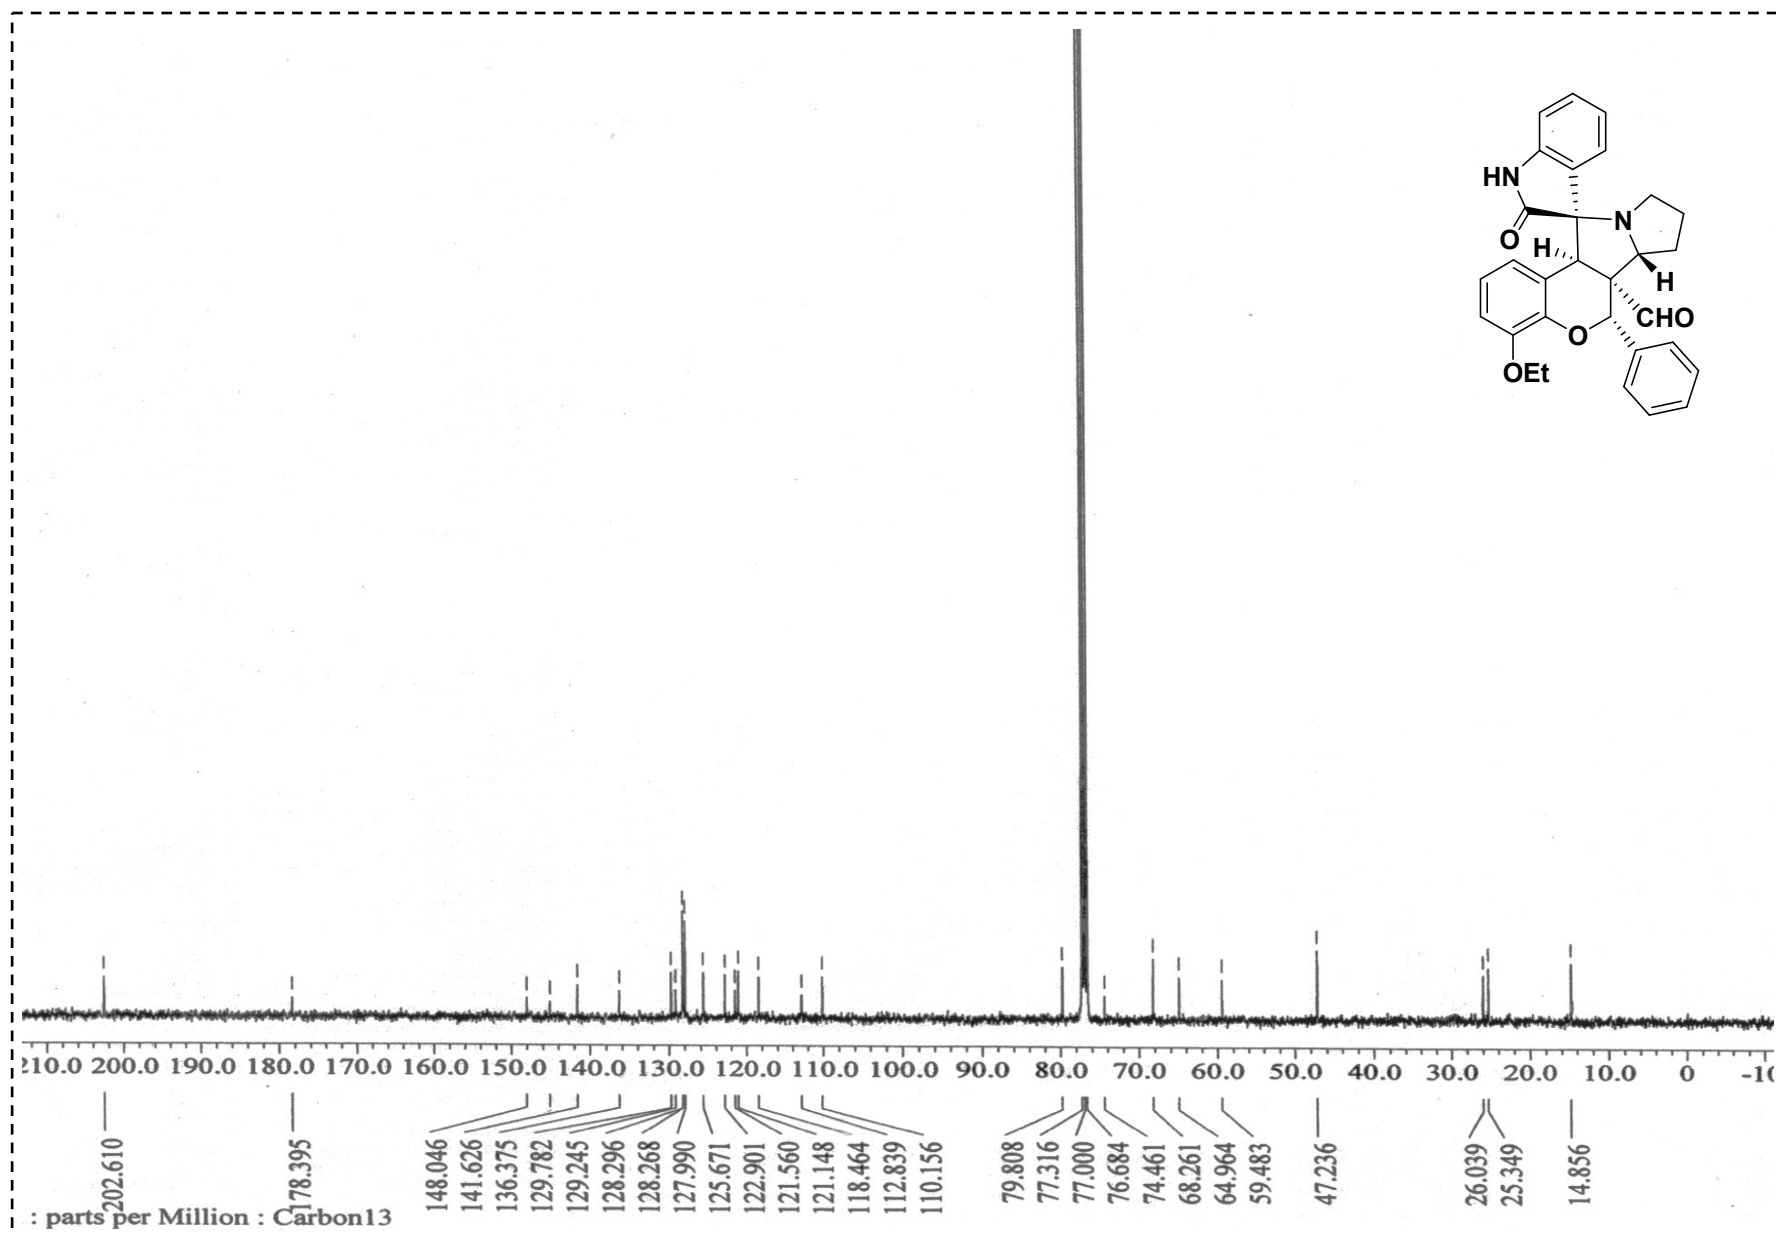

Fig S41. <sup>13</sup>C NMR spectrum of compound 16'b in CDCl<sub>3</sub>

BM

IISER BERHAMPUR  
CAIF HRMS FACILITY  
XEVO-G2XSQTOF#YFA1829

16-May-2022 15:26:19

JP-220 35 (0.666) Cm (19:37)

1: TOF MS ES+  
5.60e7

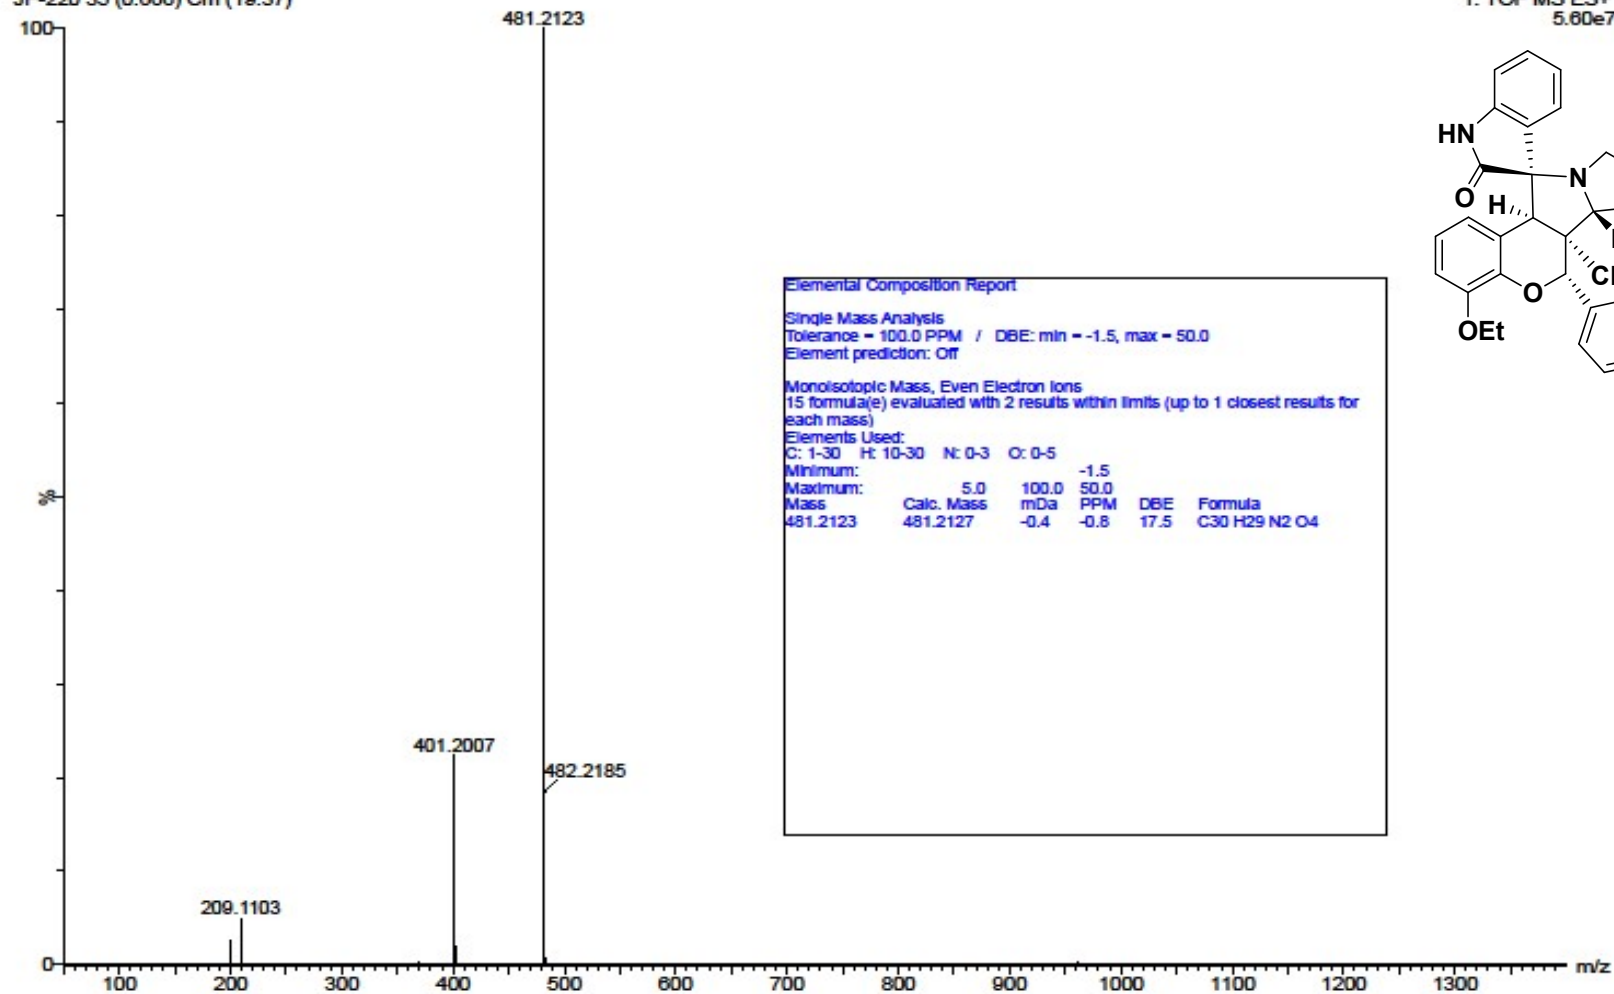

Fig S42. HRMS of compound 16'b

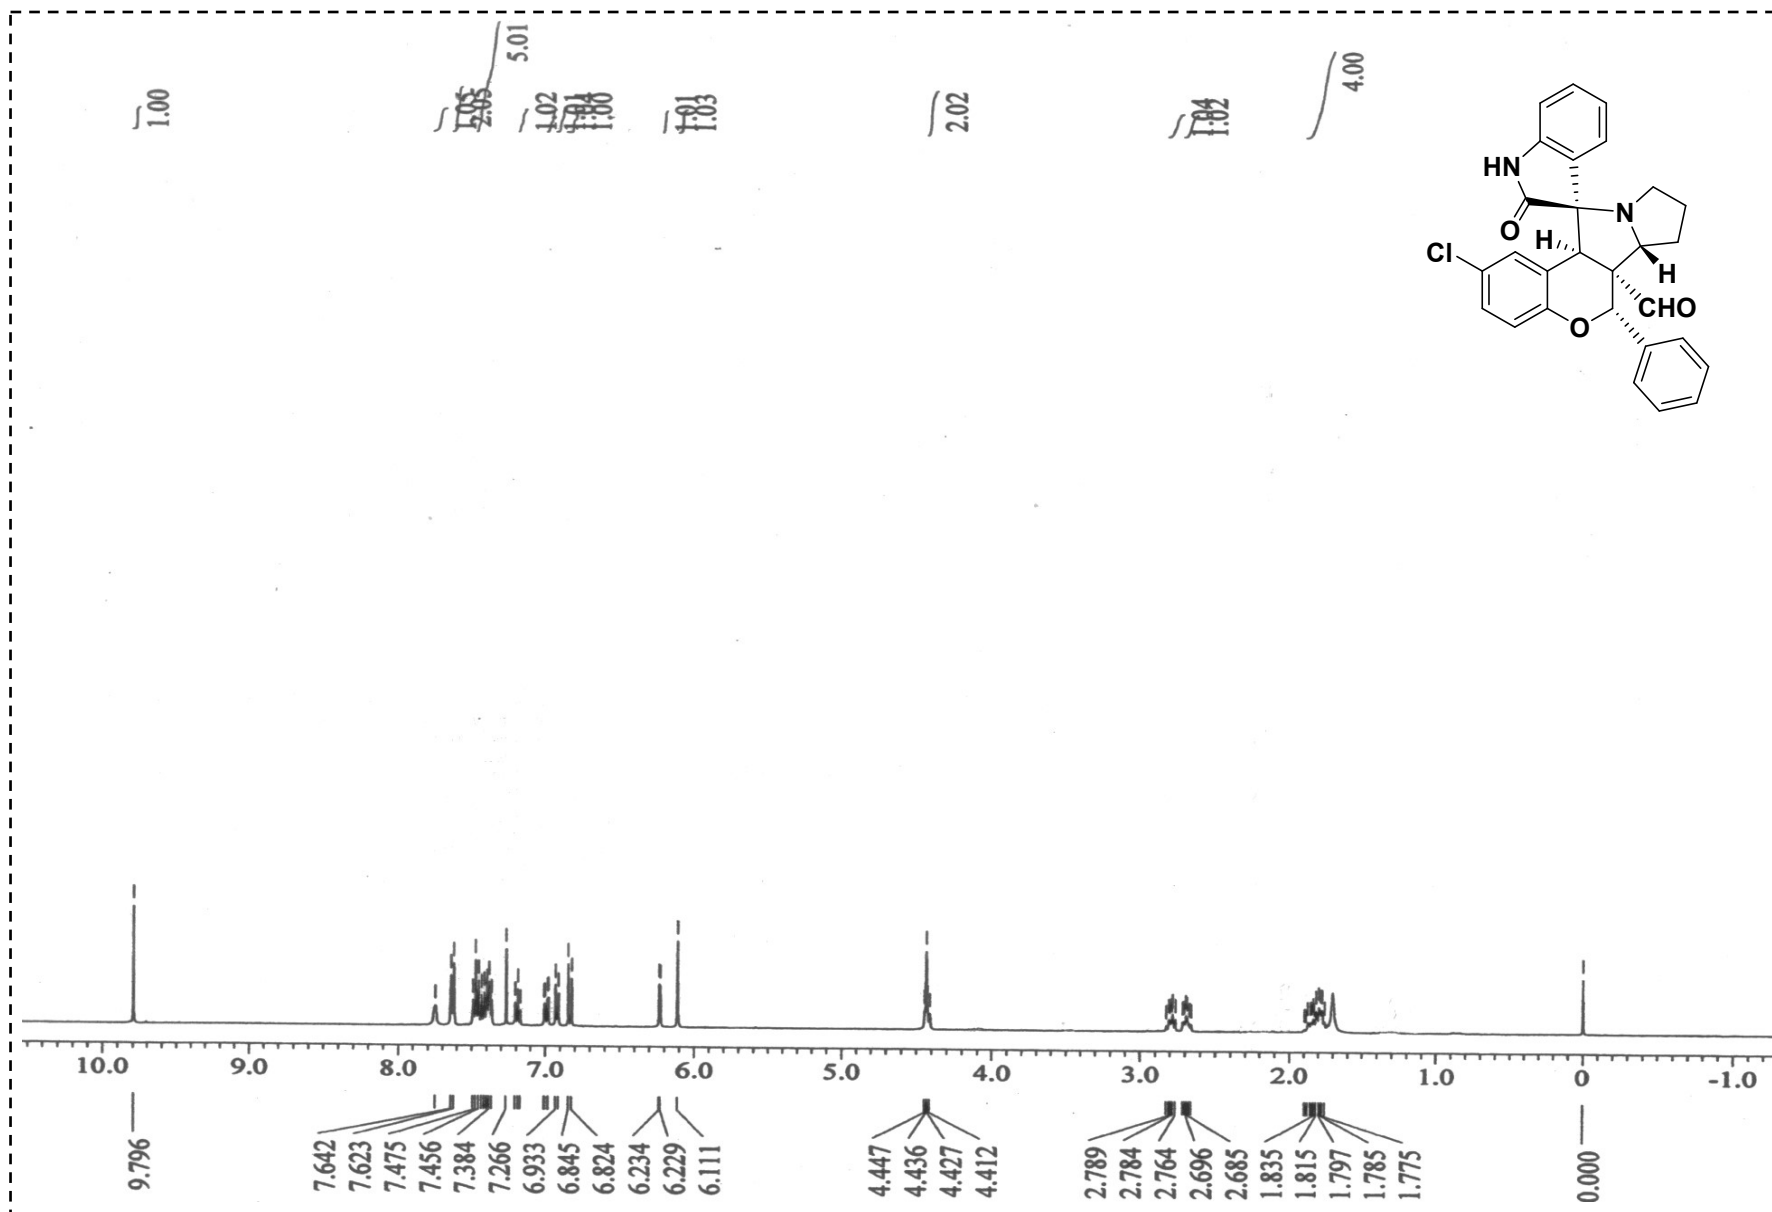

Fig S43. <sup>1</sup>H NMR spectrum of compound 16c in CDCl<sub>3</sub>

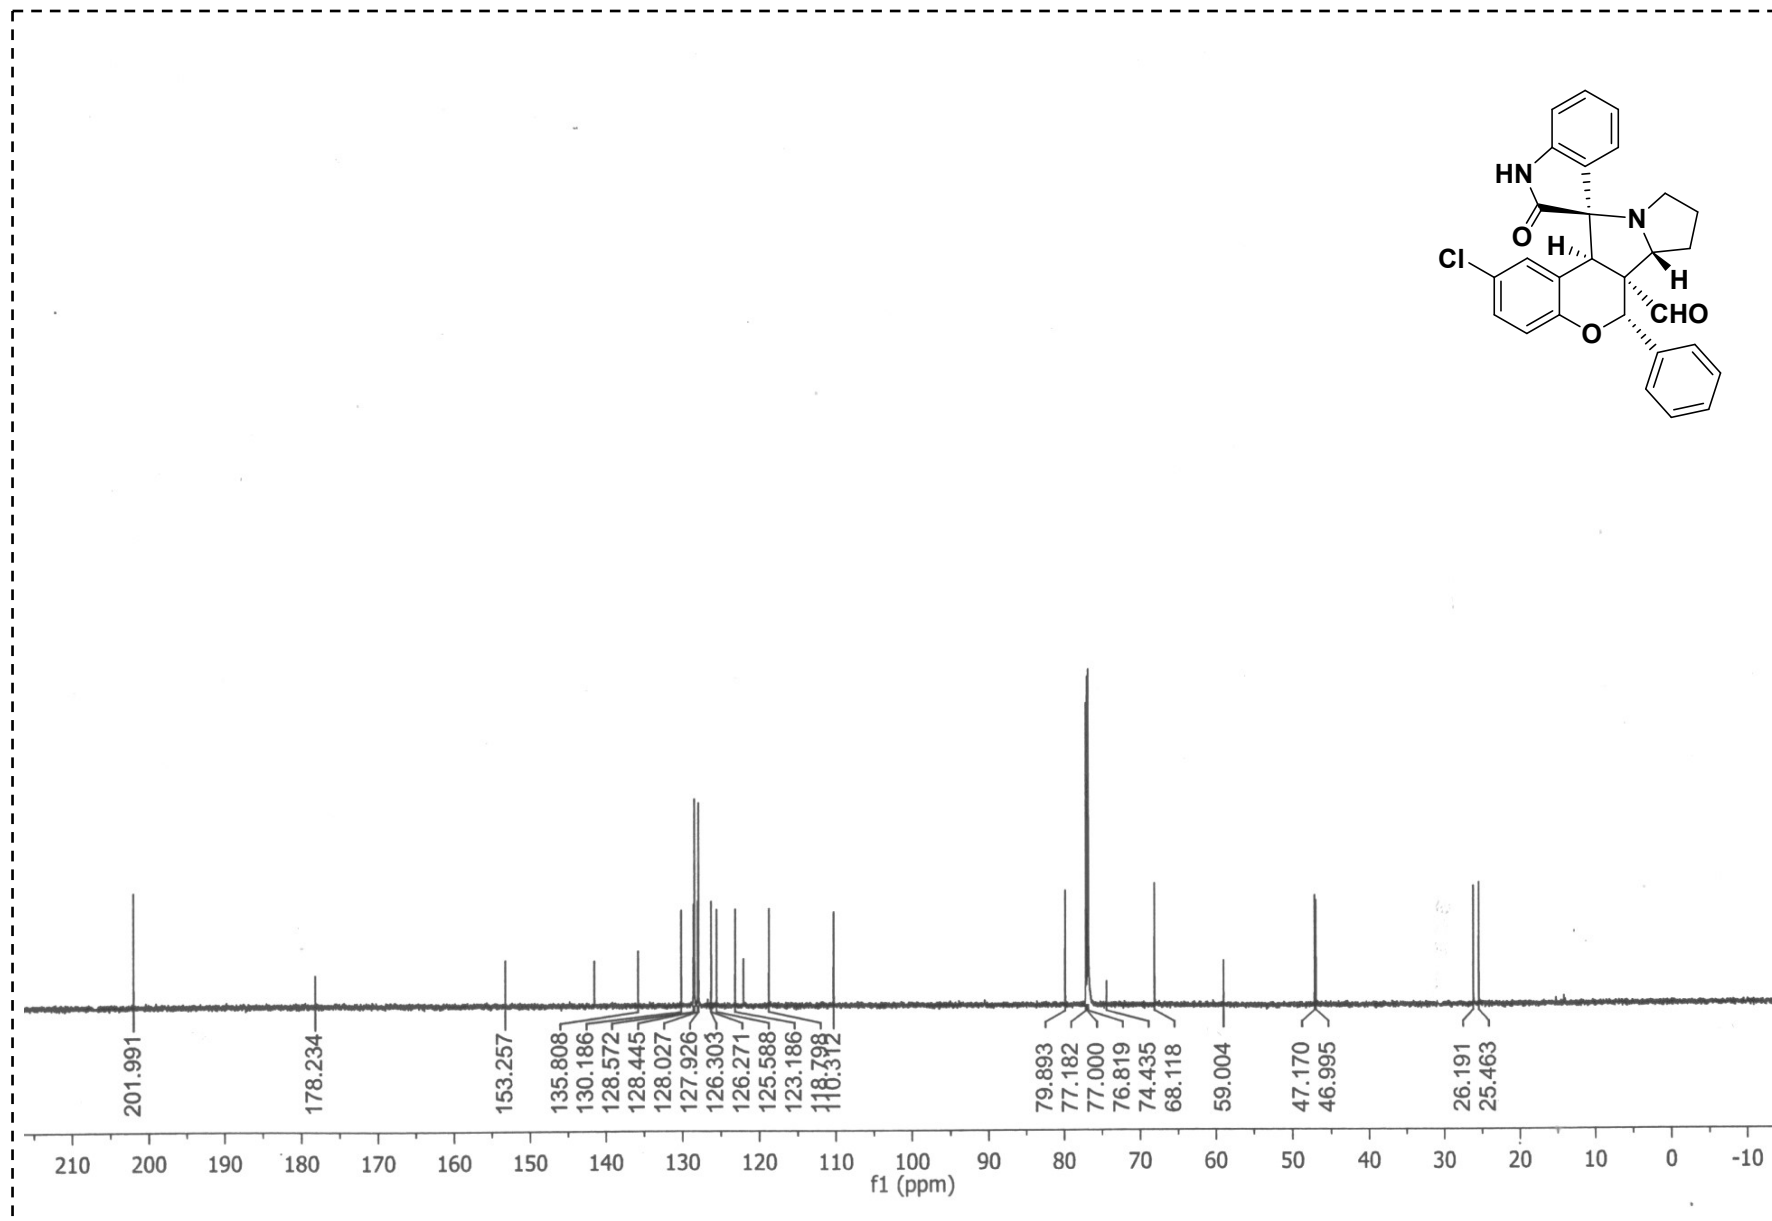

Fig S44. <sup>13</sup>C NMR spectrum of compound 16c in CDCl<sub>3</sub>

BM

IISER BERHAMPUR  
CAIF HRMS FACILITY  
XEVO-G2XSQTOF#YFA1829

16-May-2022 13:42:39

JP-224-1 10 (0.209) Cm (4:29)

1: TOF MS ES+  
8.02e7

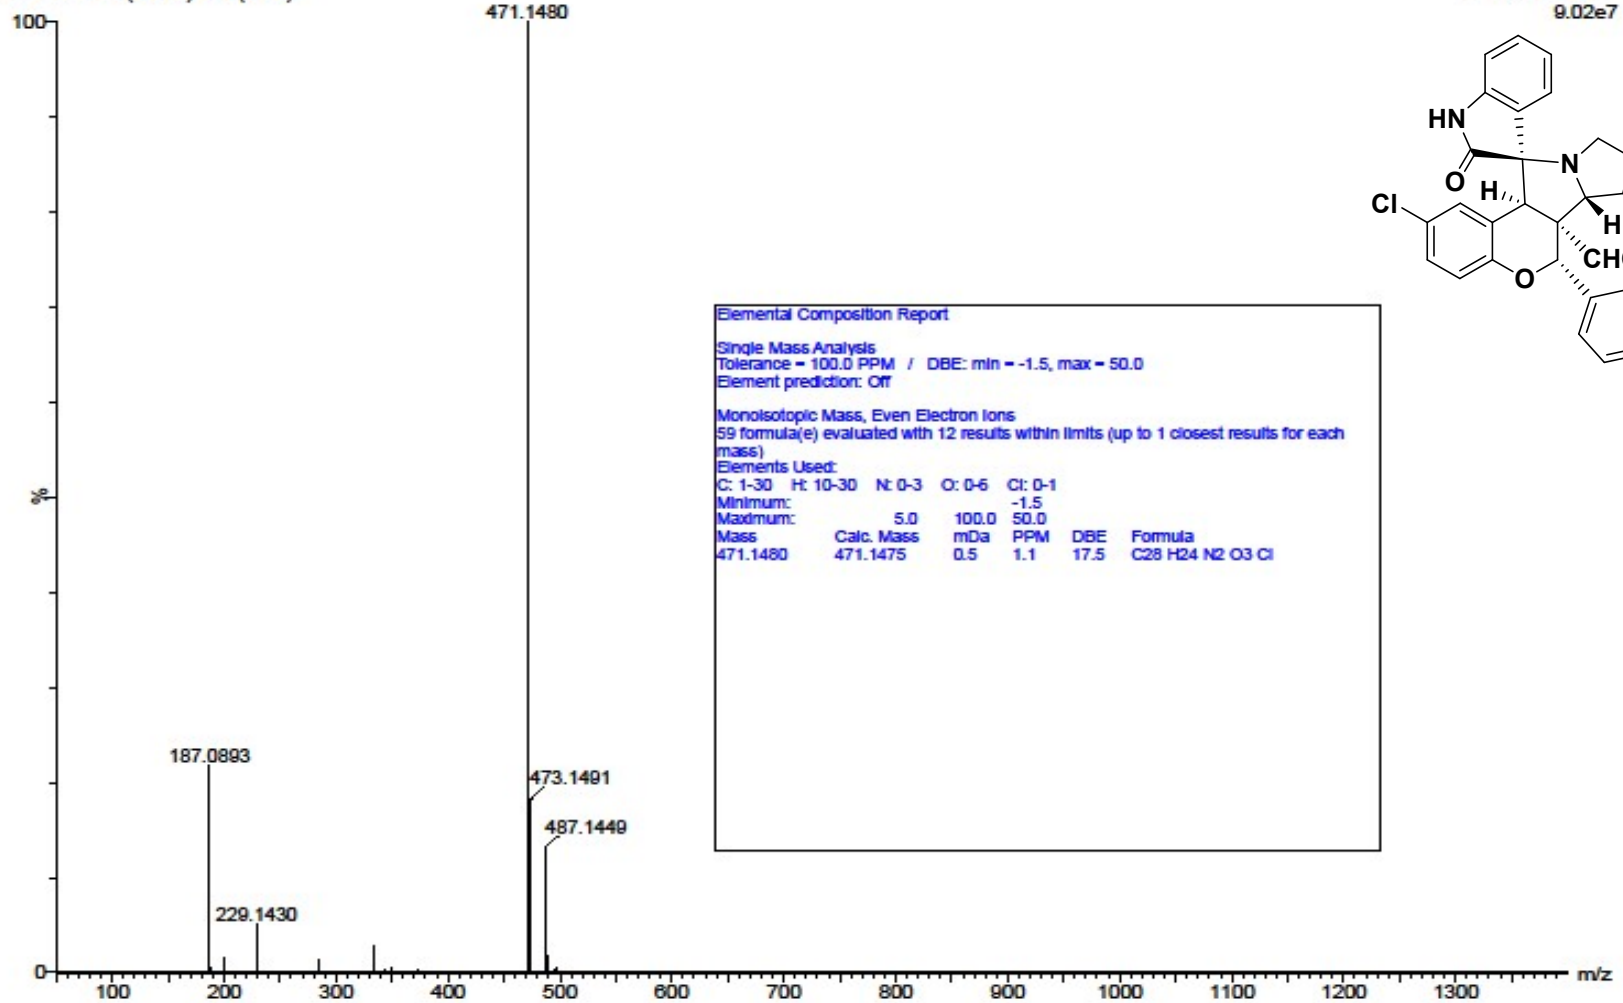

Fig S45. HRMS of compound 16c

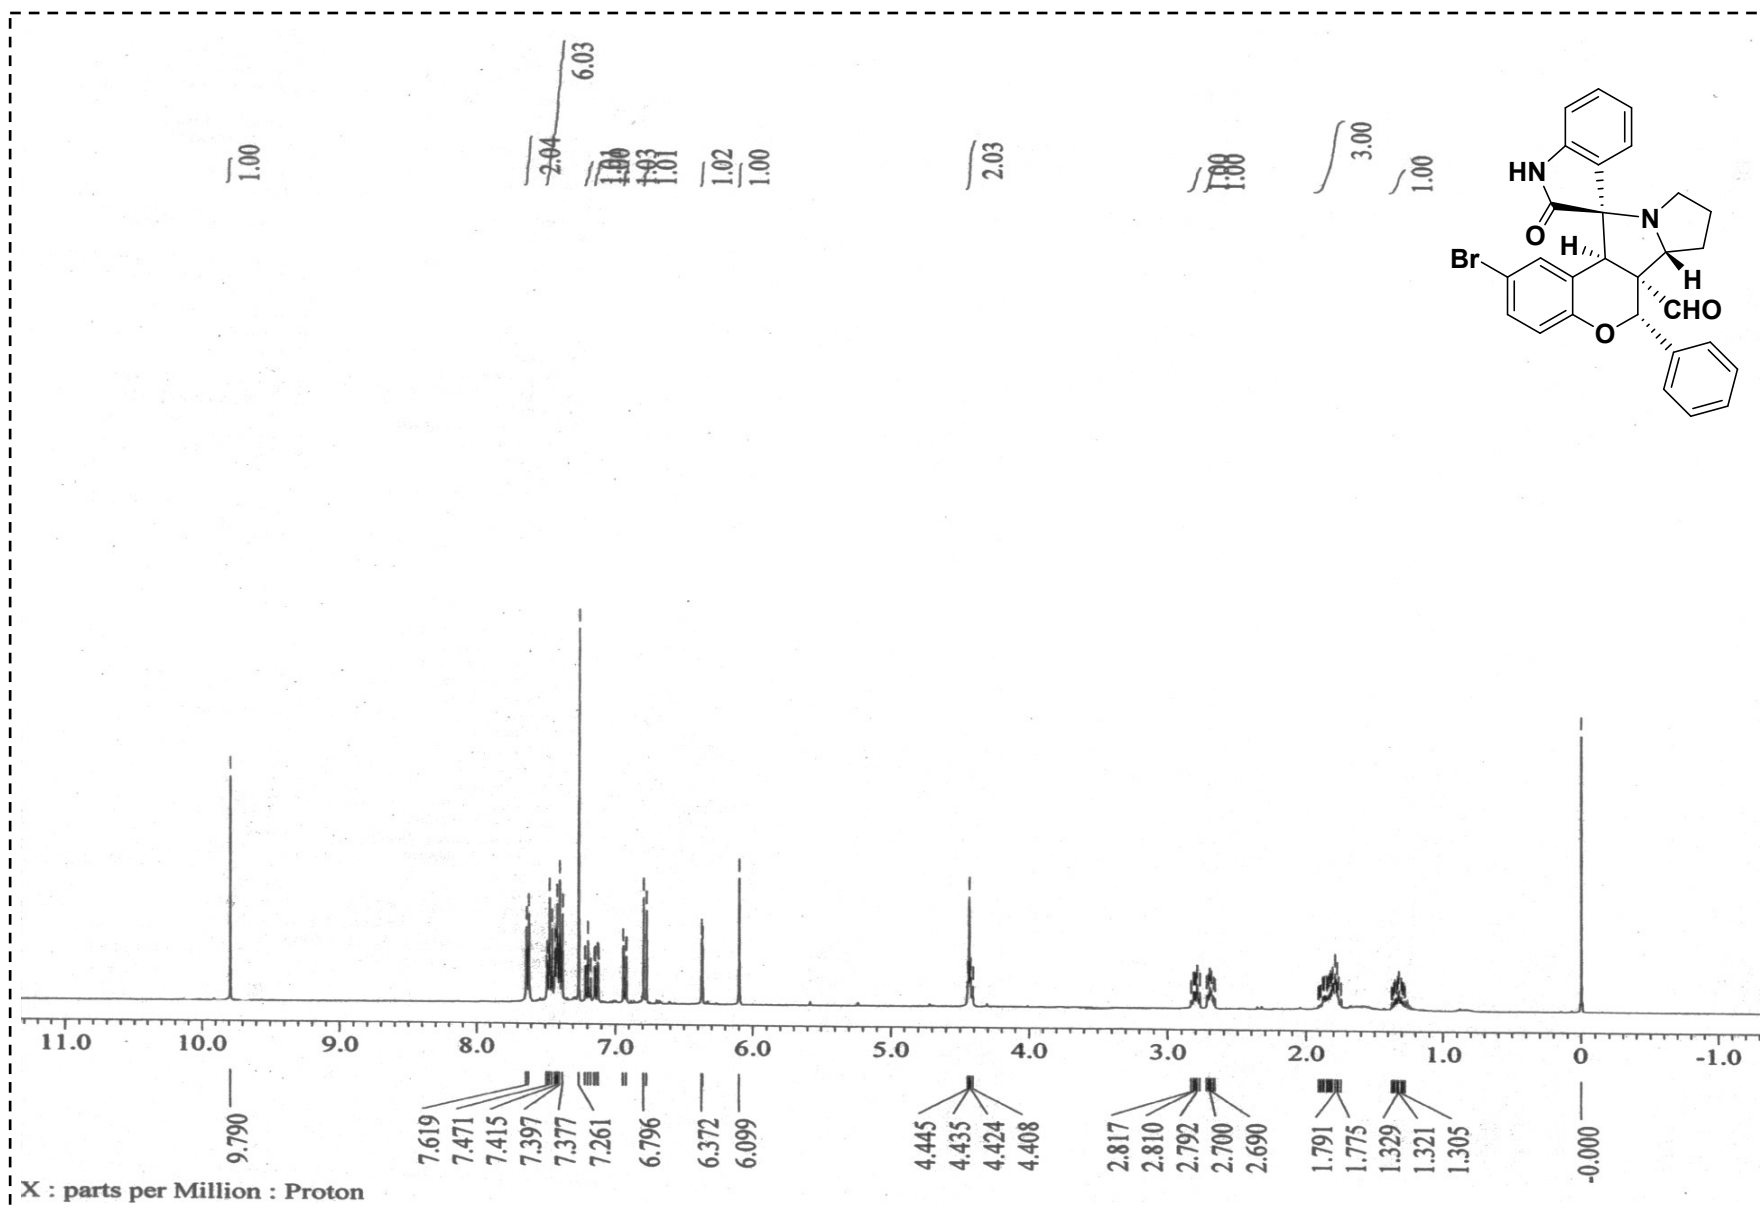

Fig S46. <sup>1</sup>H NMR spectrum of compound 16'd in CDCl<sub>3</sub>

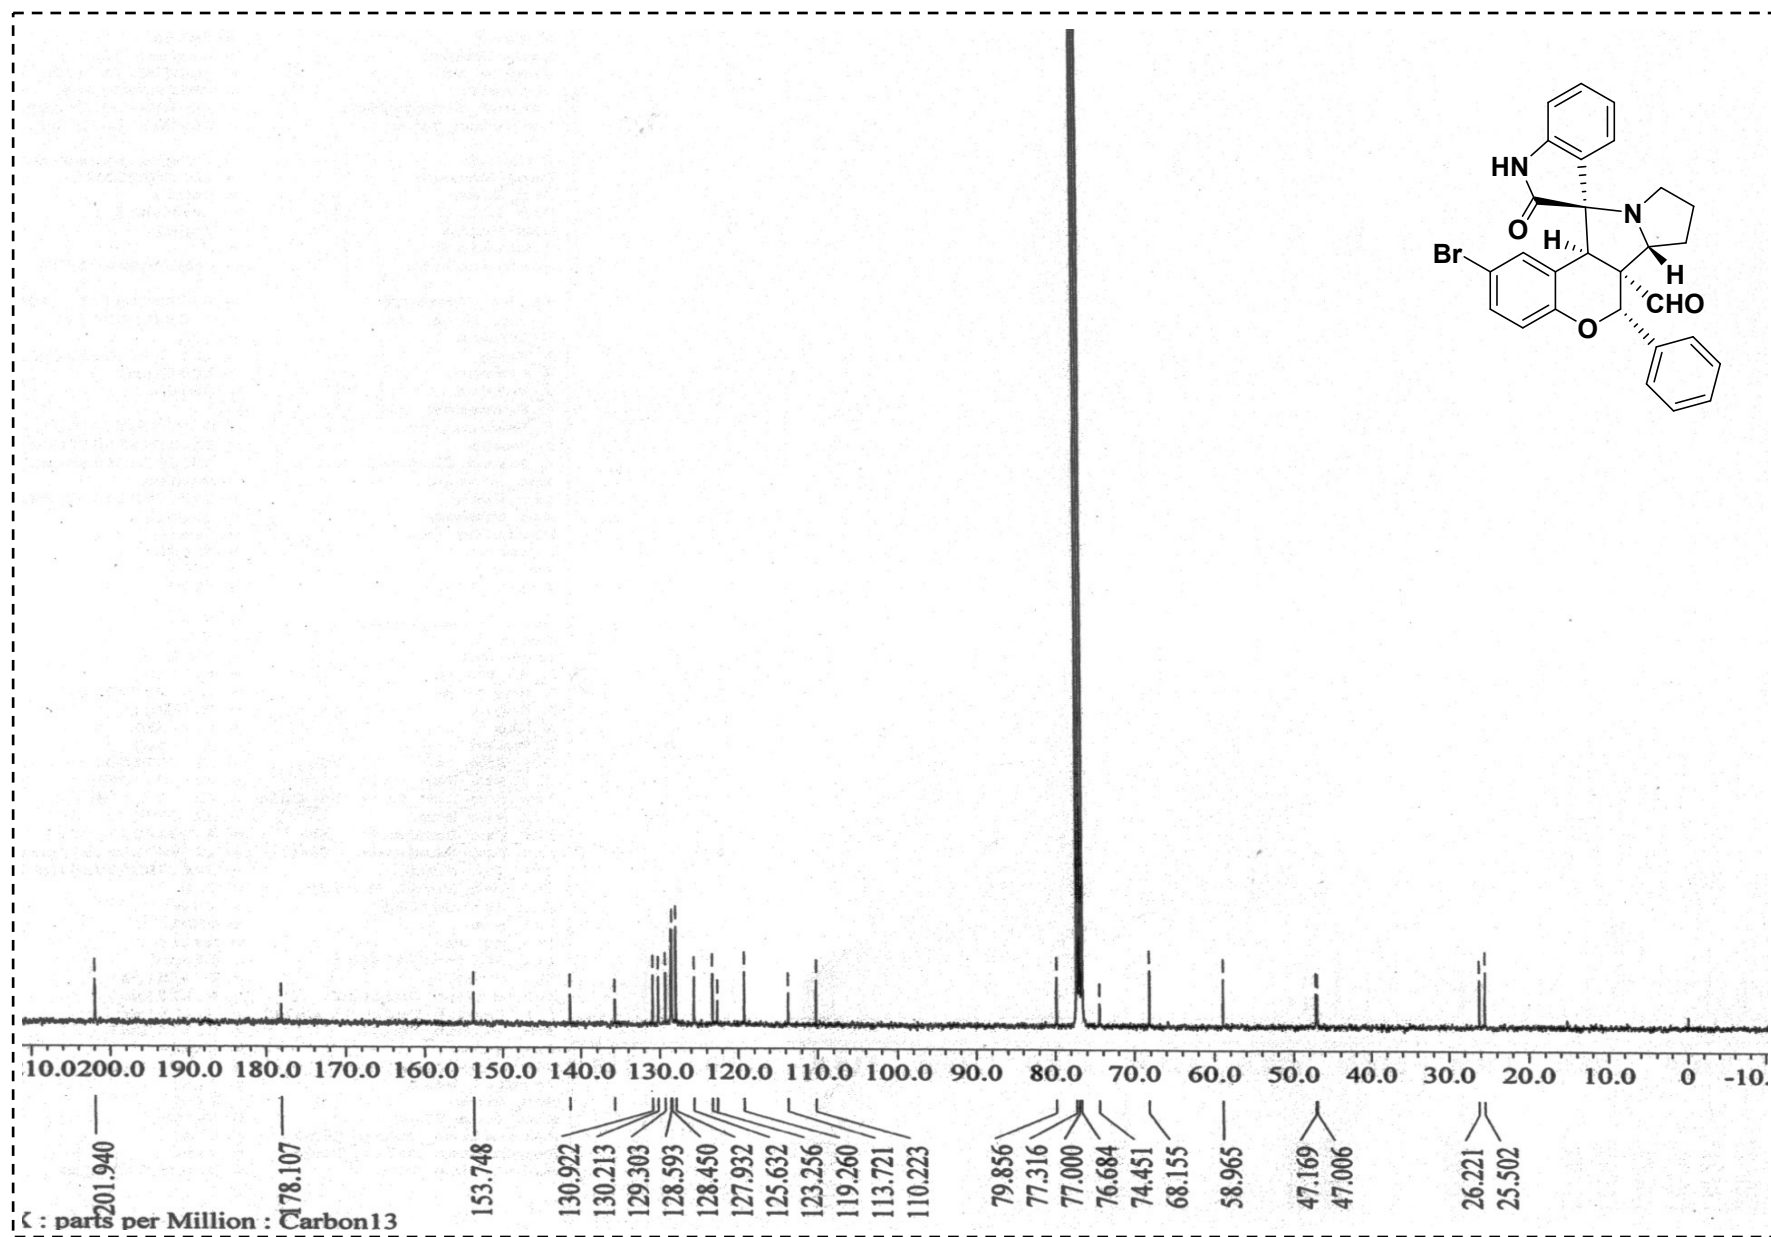

Fig S47.  $^{13}\text{C}$  NMR spectrum of compound 16'd in  $\text{CDCl}_3$



BM

IISER BERHAMPUR  
CAIF HRMS FACILITY  
XEVO-G2XSQTOF#YFA1829

16-May-2022 14:47:16

JP-222-4 (0.096)

1: TOF MS ES+  
6.23e4

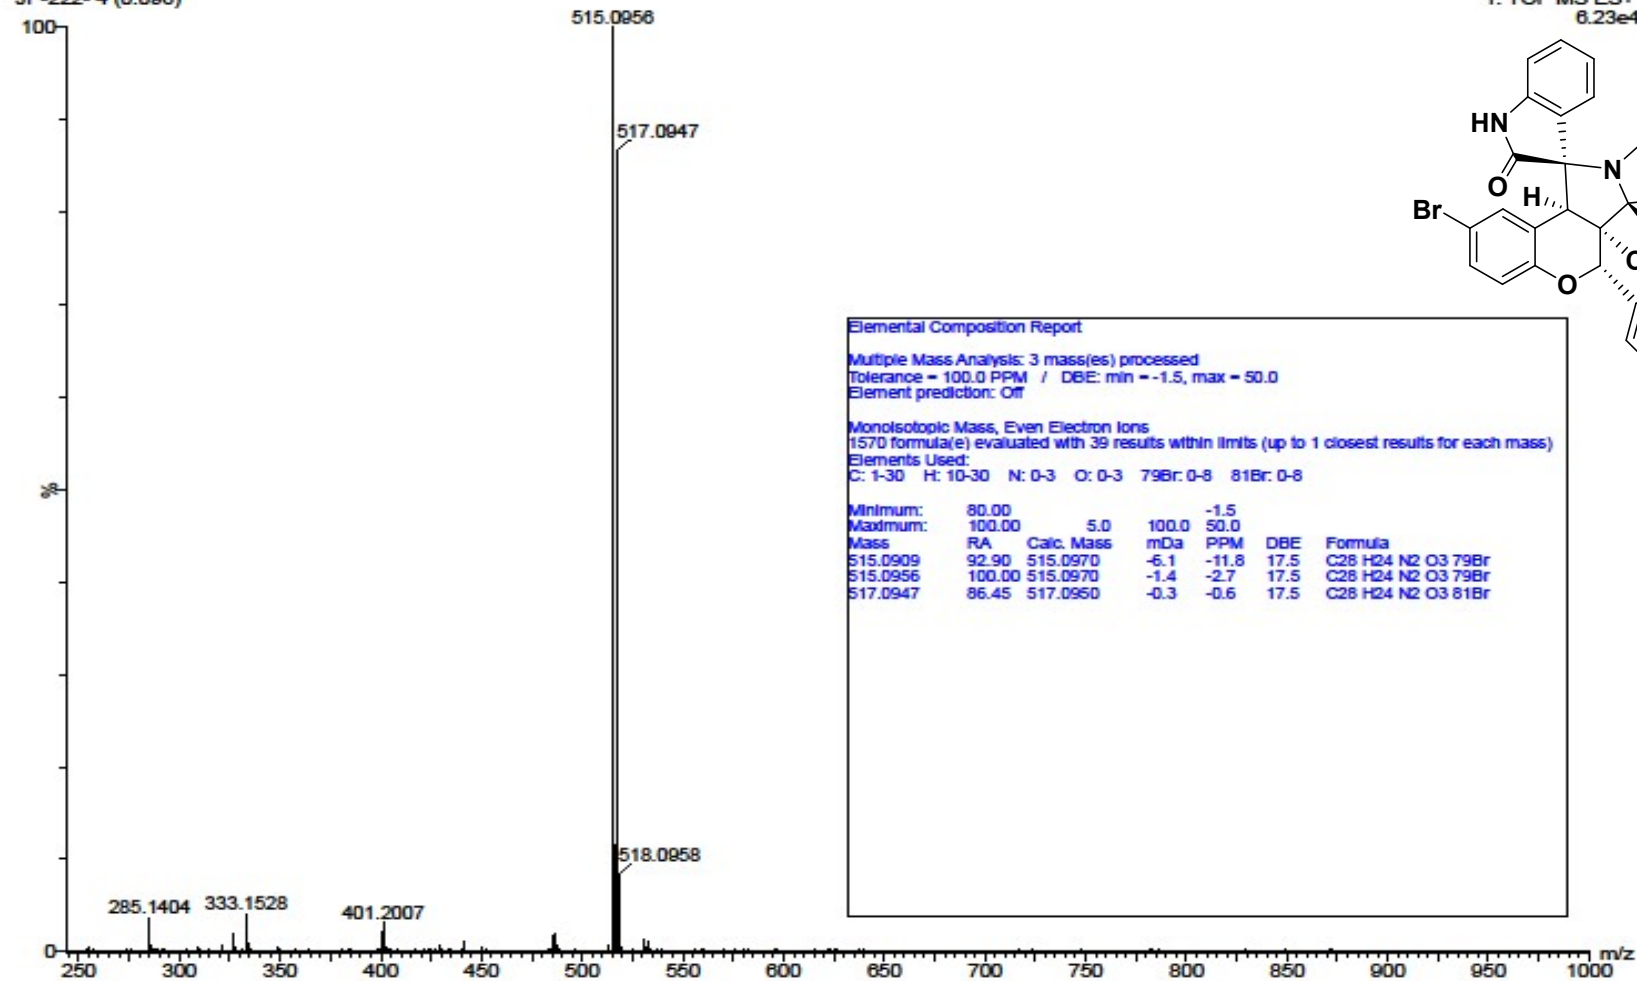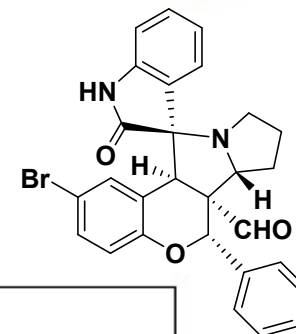

Fig S48. HRMS of compound 16'd

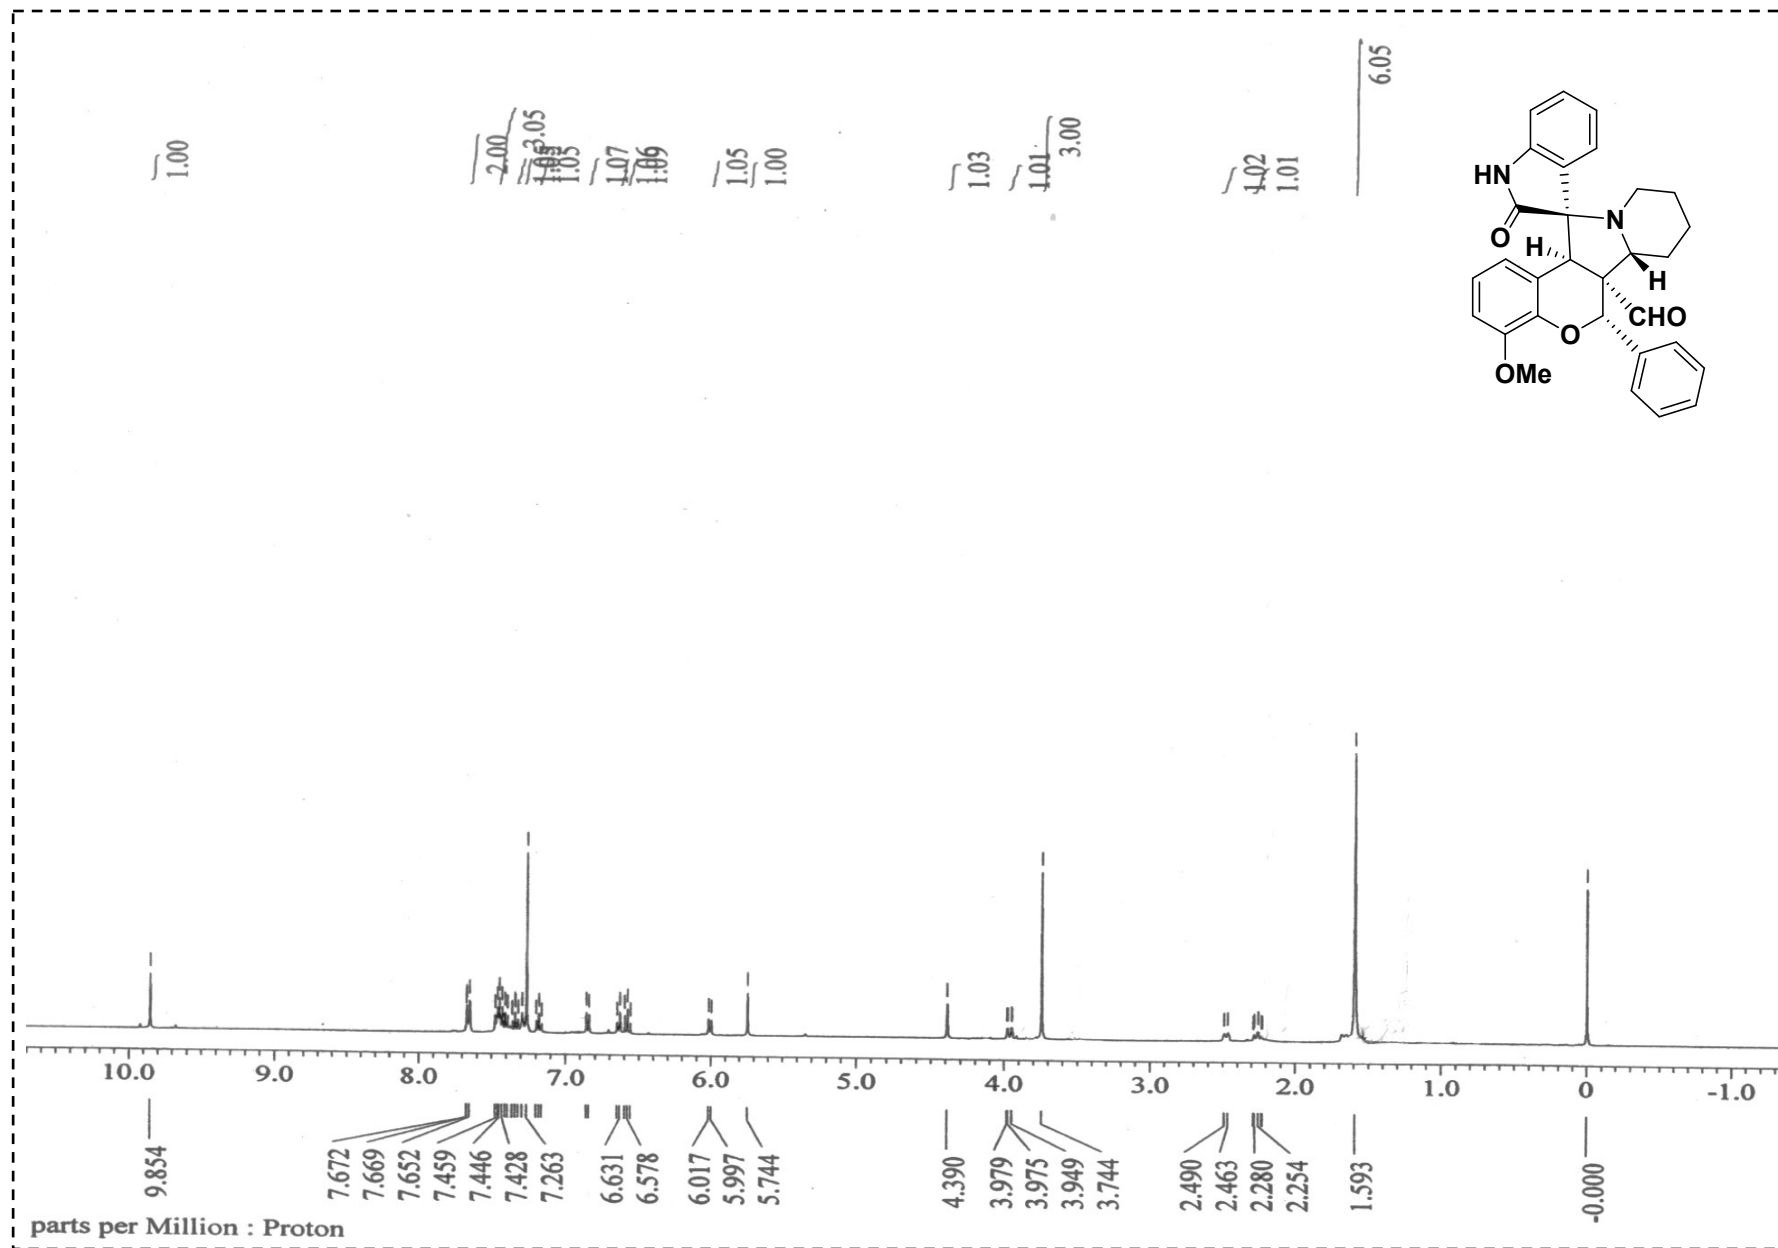

Fig S49. <sup>1</sup>H NMR spectrum of compound **16'e** in CDCl<sub>3</sub>

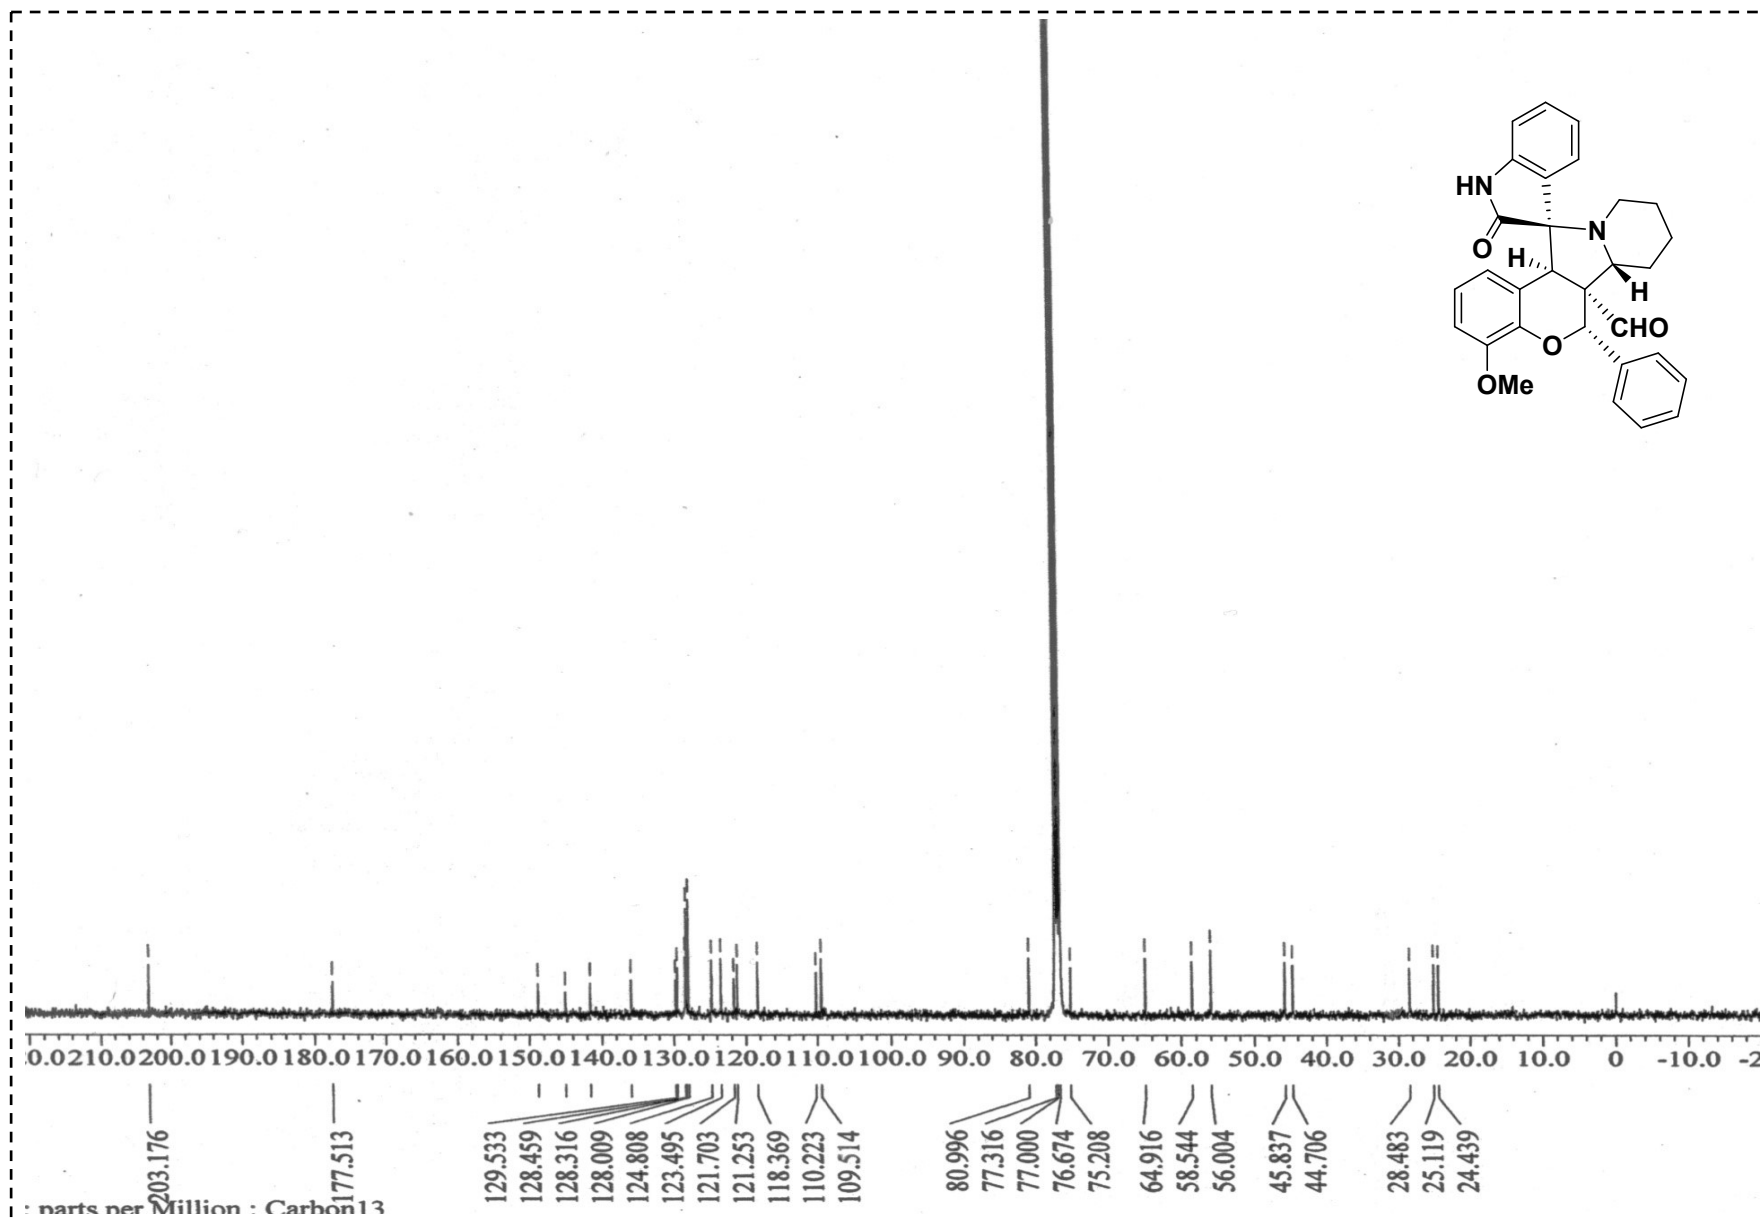

Fig S50.  $^{13}\text{C}$  NMR spectrum of compound **16'e** in  $\text{CDCl}_3$

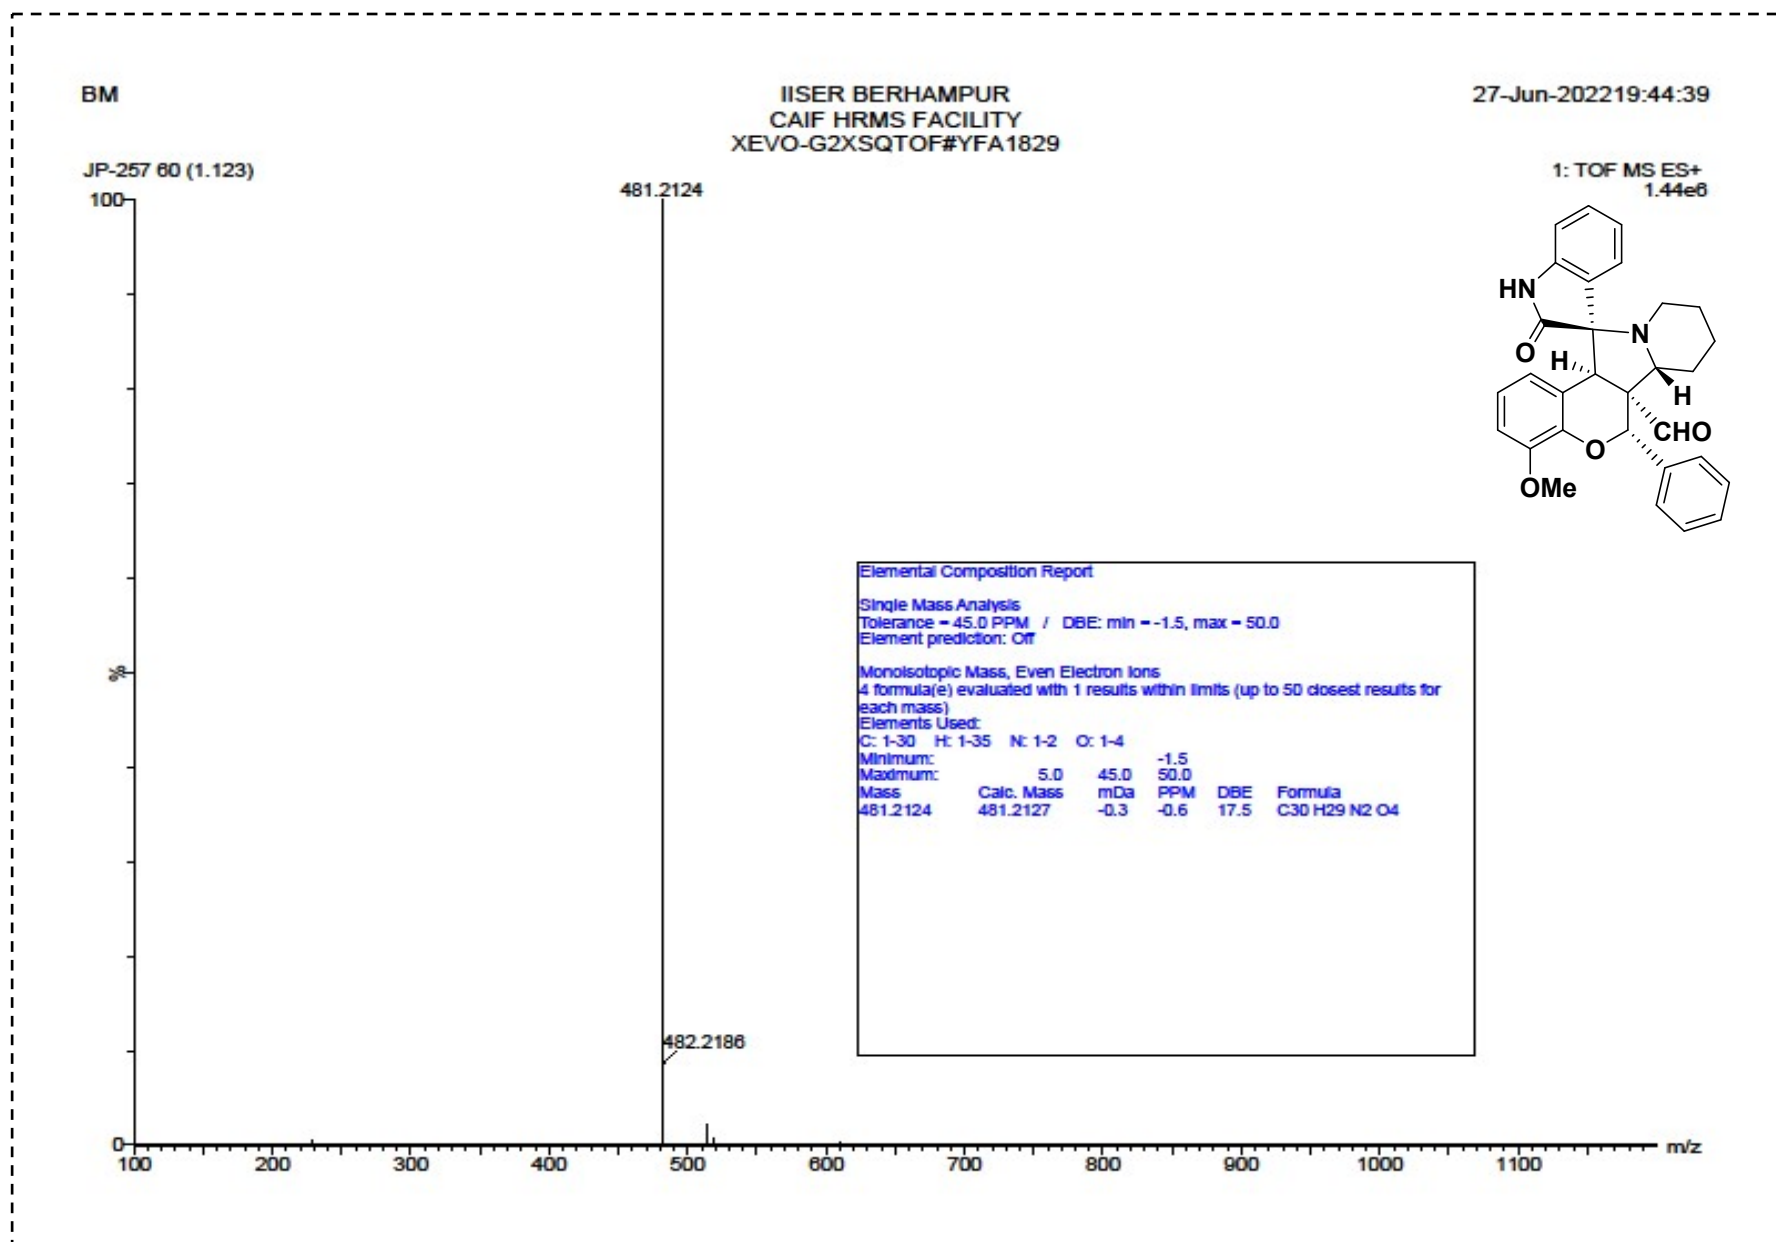

Fig S51. HRMS of compound 16'e

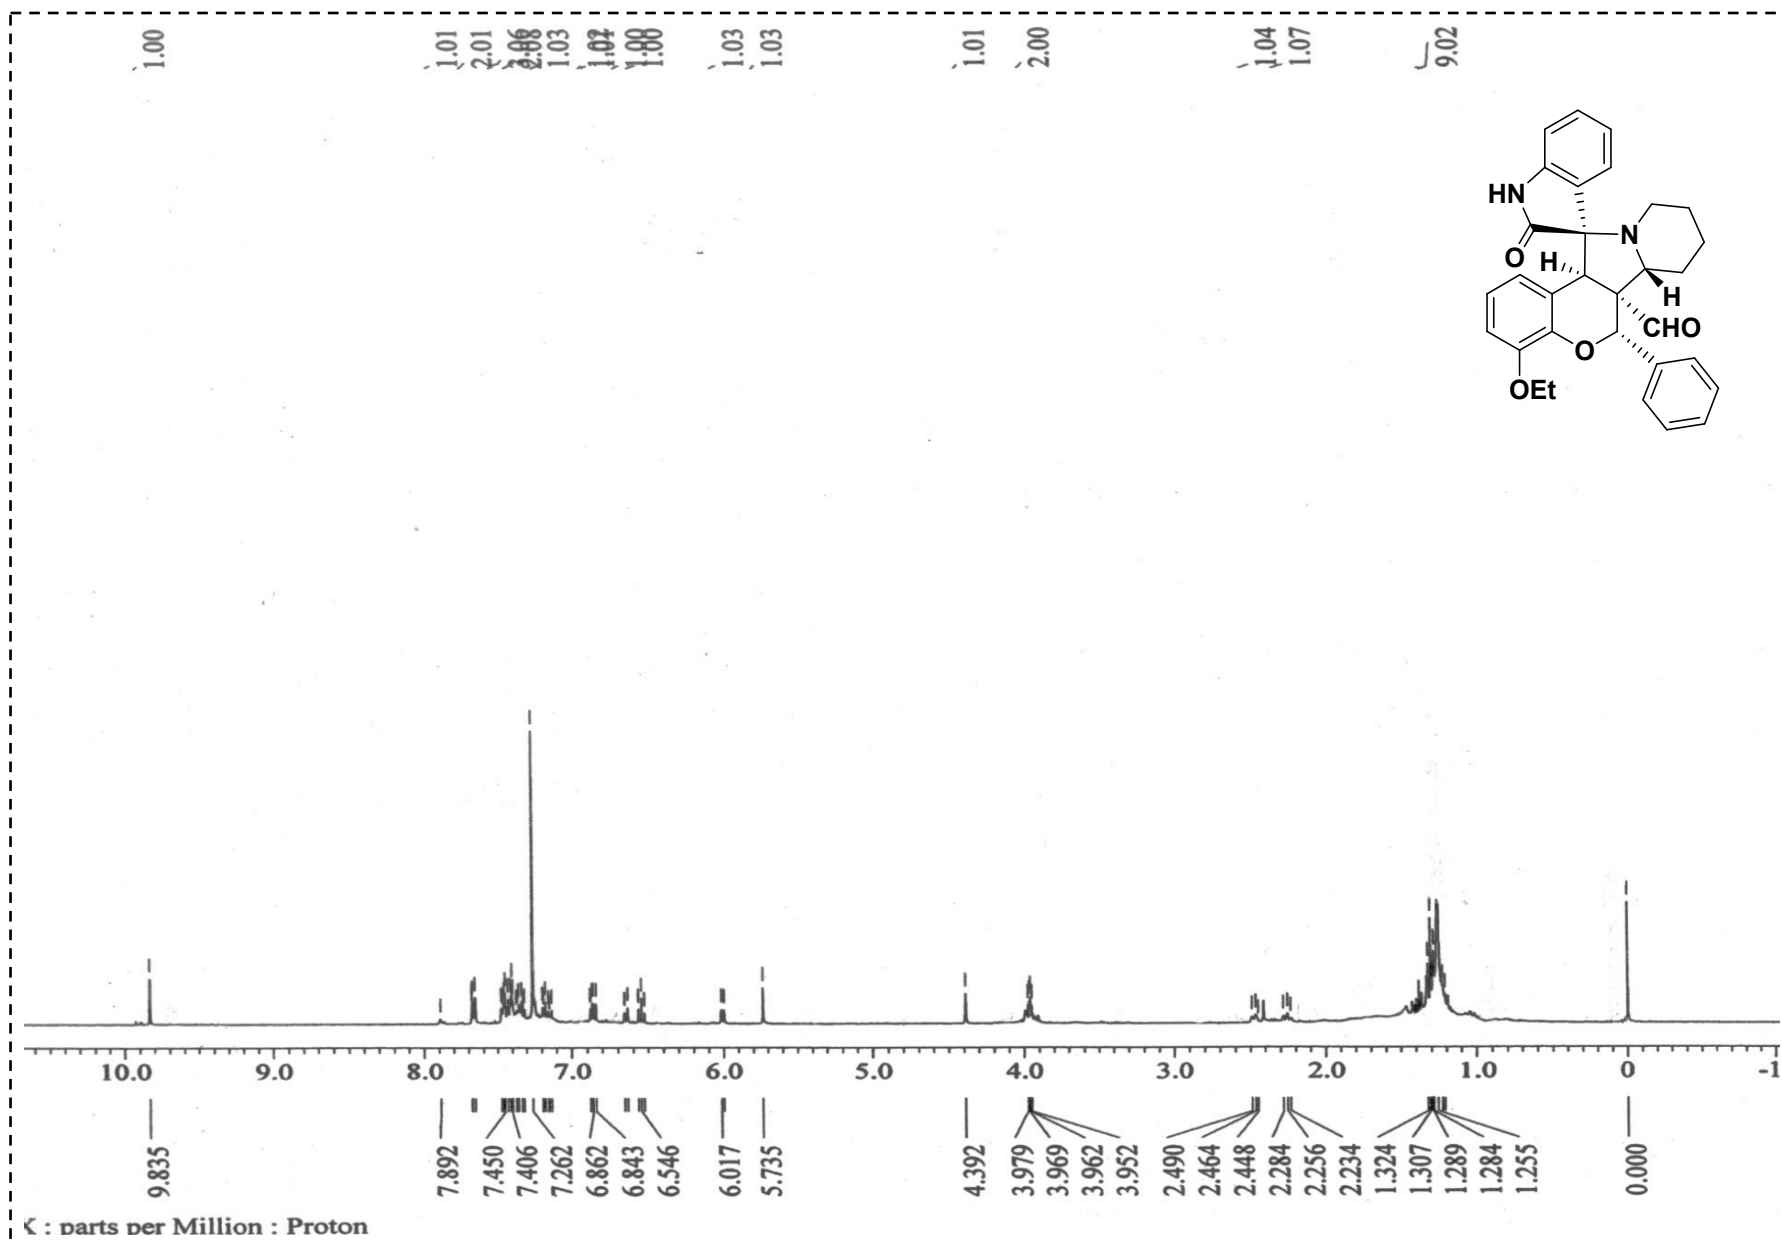

Fig S52. <sup>1</sup>H NMR spectrum of compound 16f in CDCl<sub>3</sub>

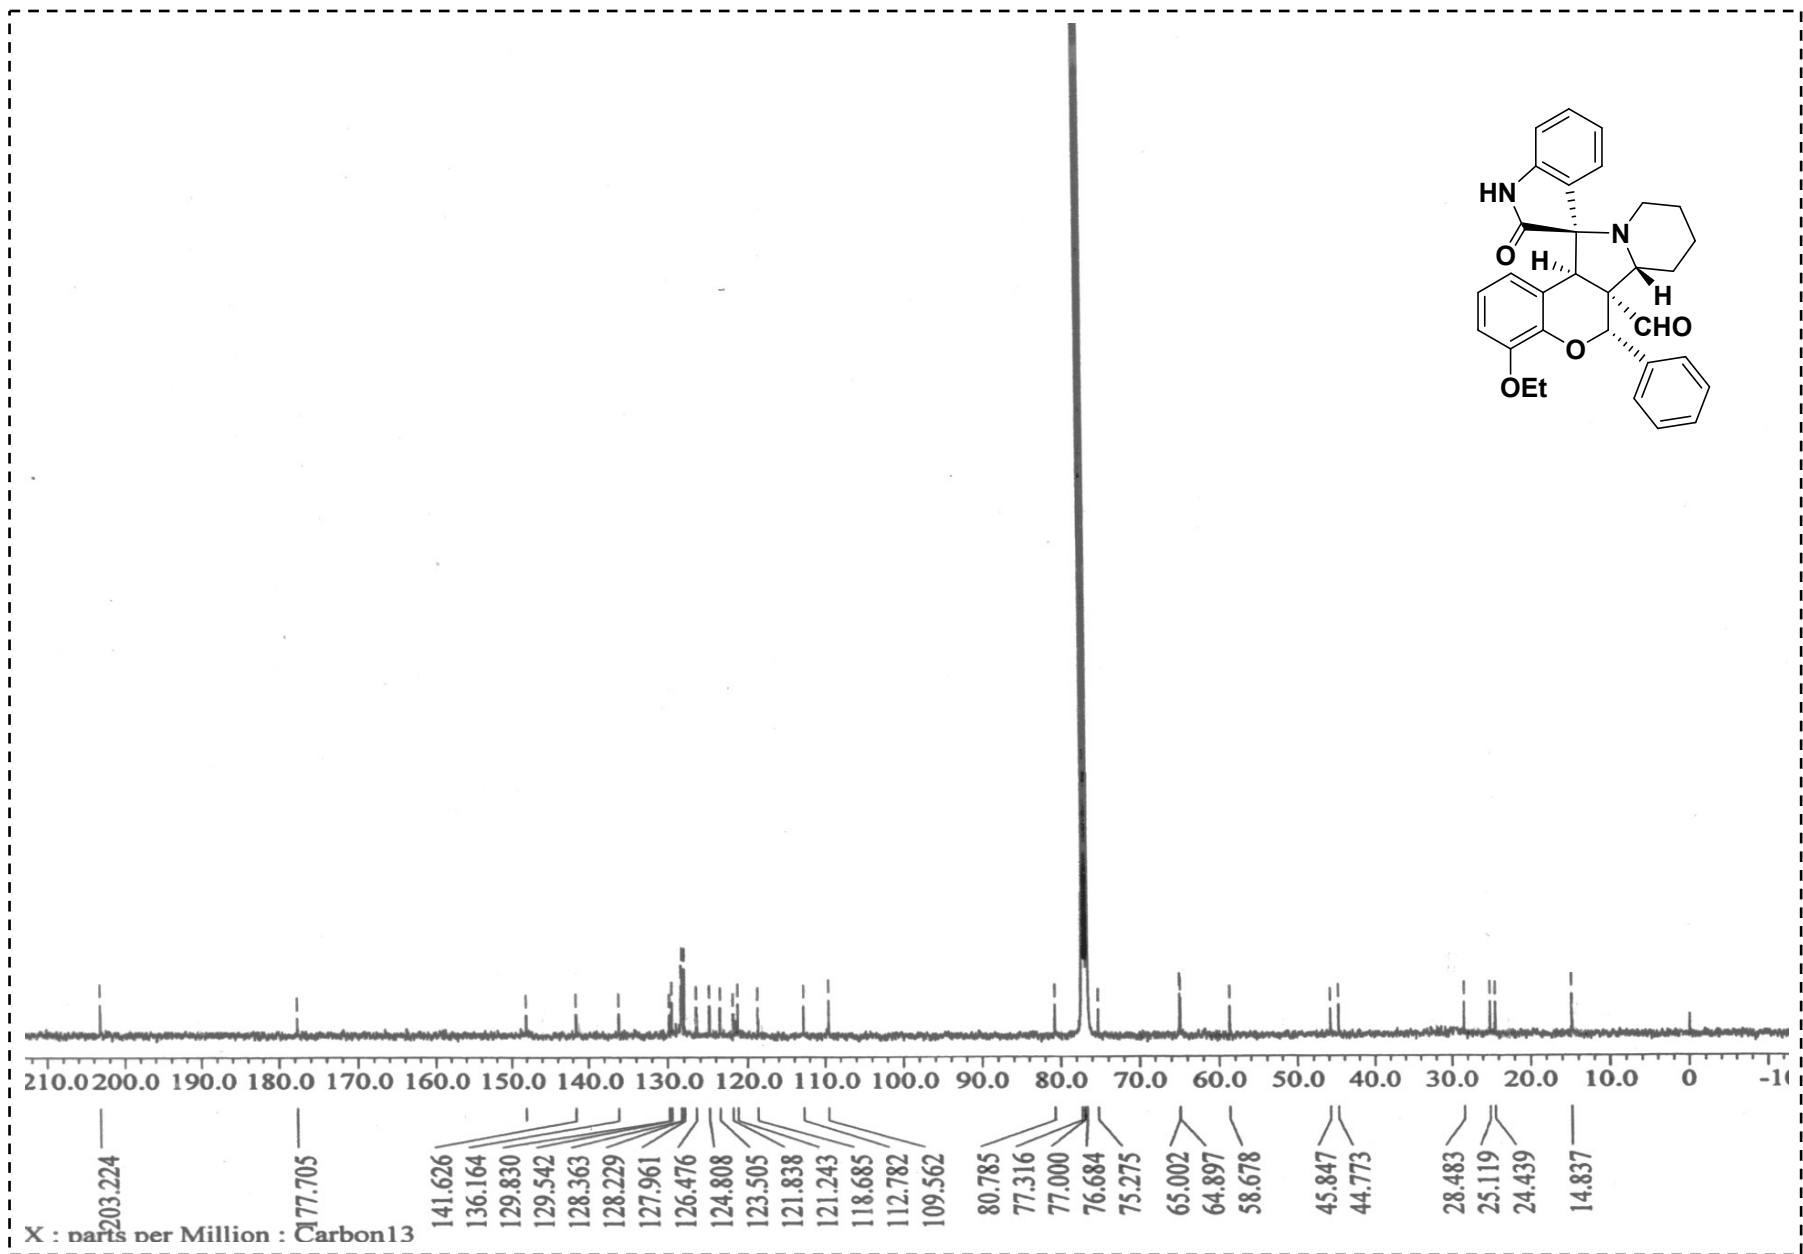

Fig S53.  $^{13}\text{C}$  NMR spectrum of compound 16f in  $\text{CDCl}_3$

BM

IISER BERHAMPUR  
CAIF HRMS FACILITY  
XEVO-G2XSQTOF#YFA1829

27-Jun-2022 19:50:19

JP-263 84 (1.564) Cm (84:89)

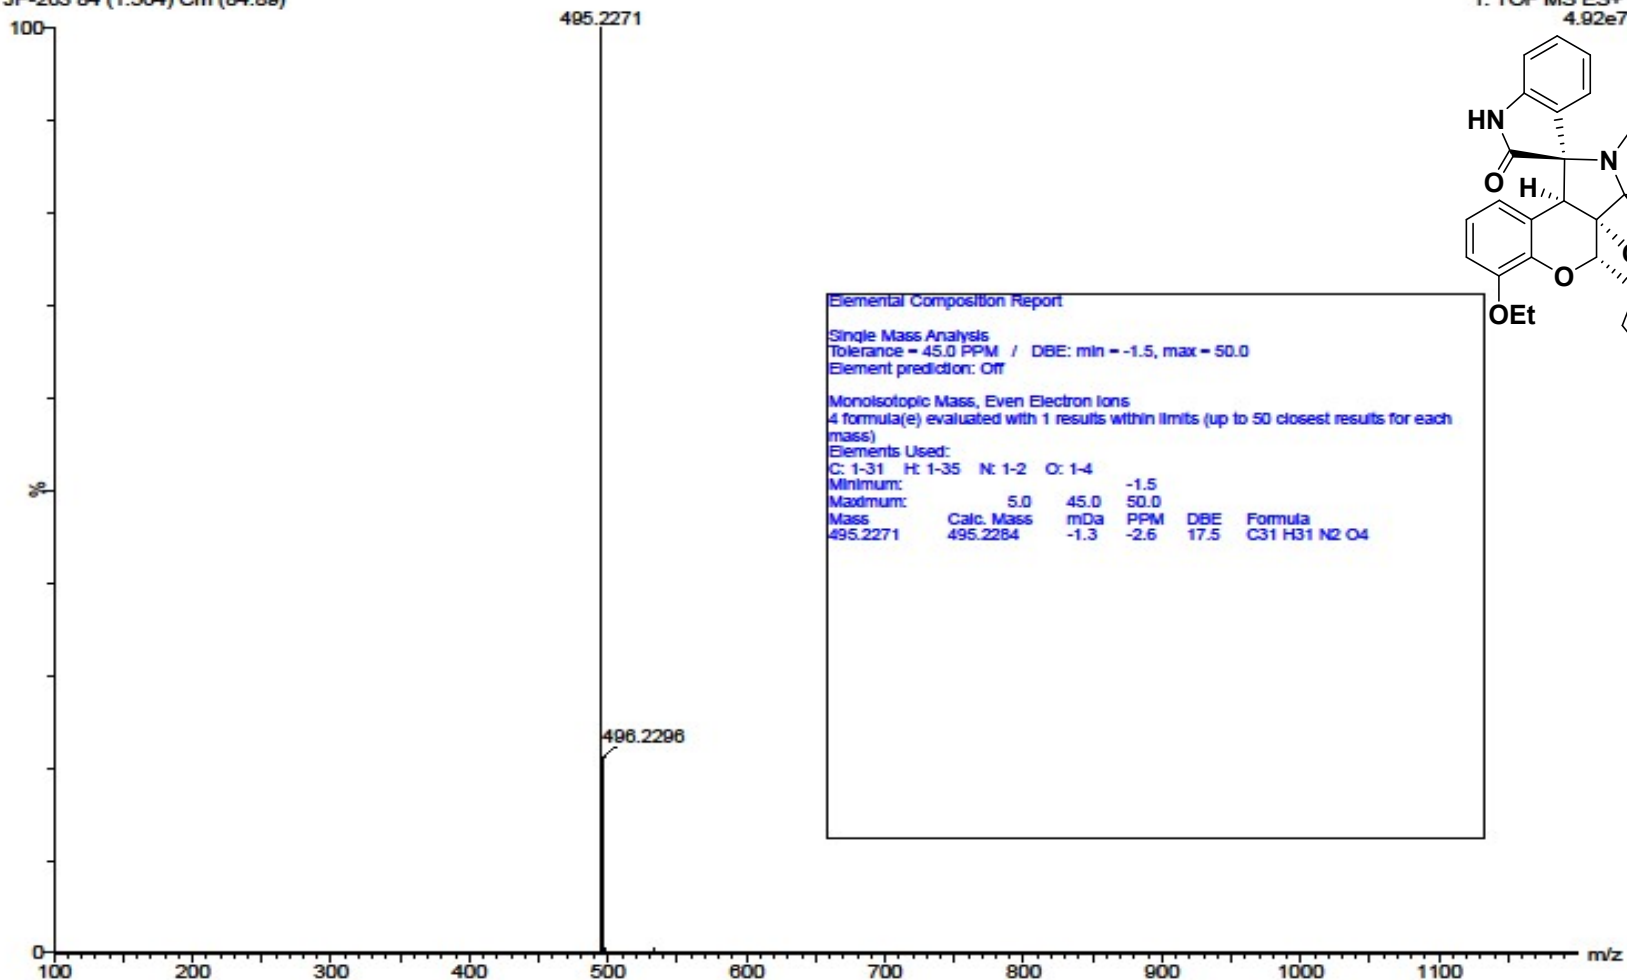

Fig S54. HRMS of compound 16'f

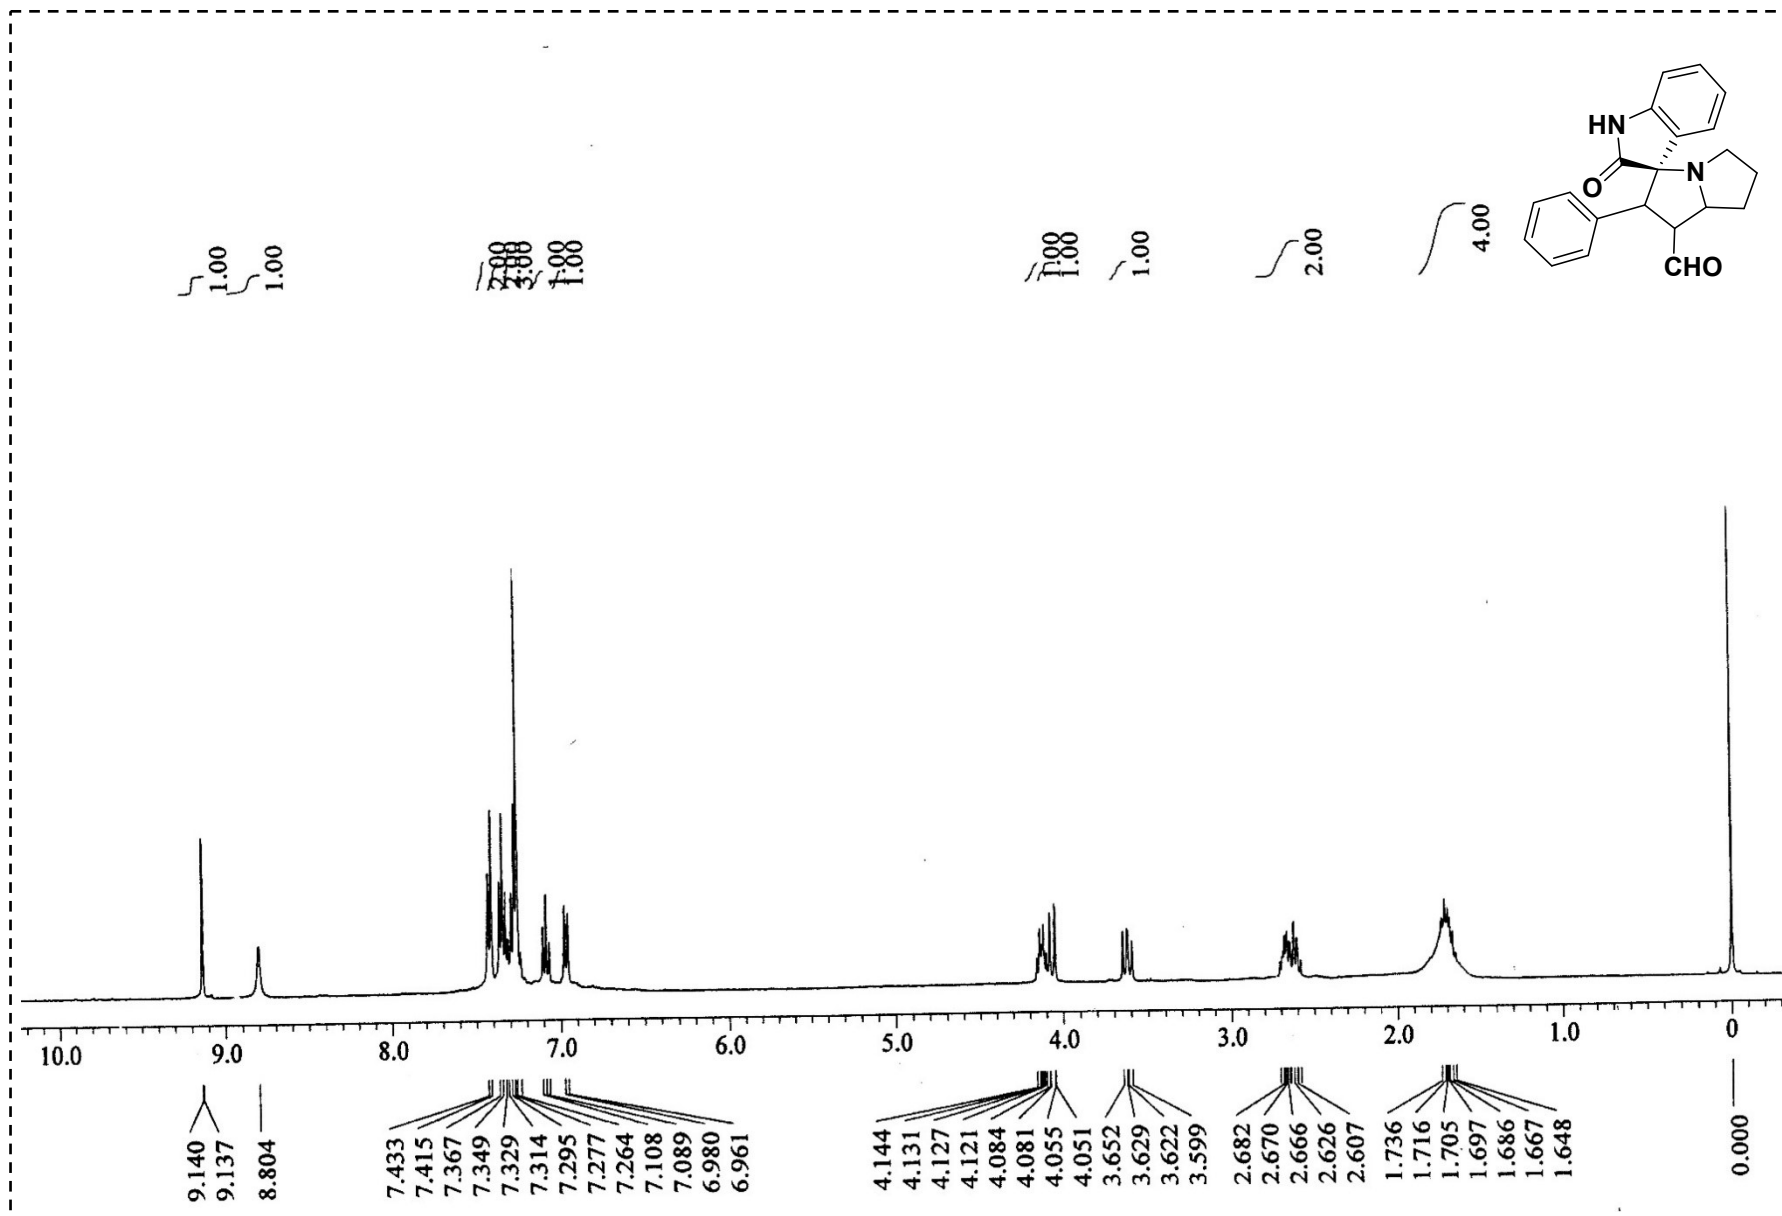

Fig S55. <sup>1</sup>H NMR spectrum of compound 17 in CDCl<sub>3</sub>



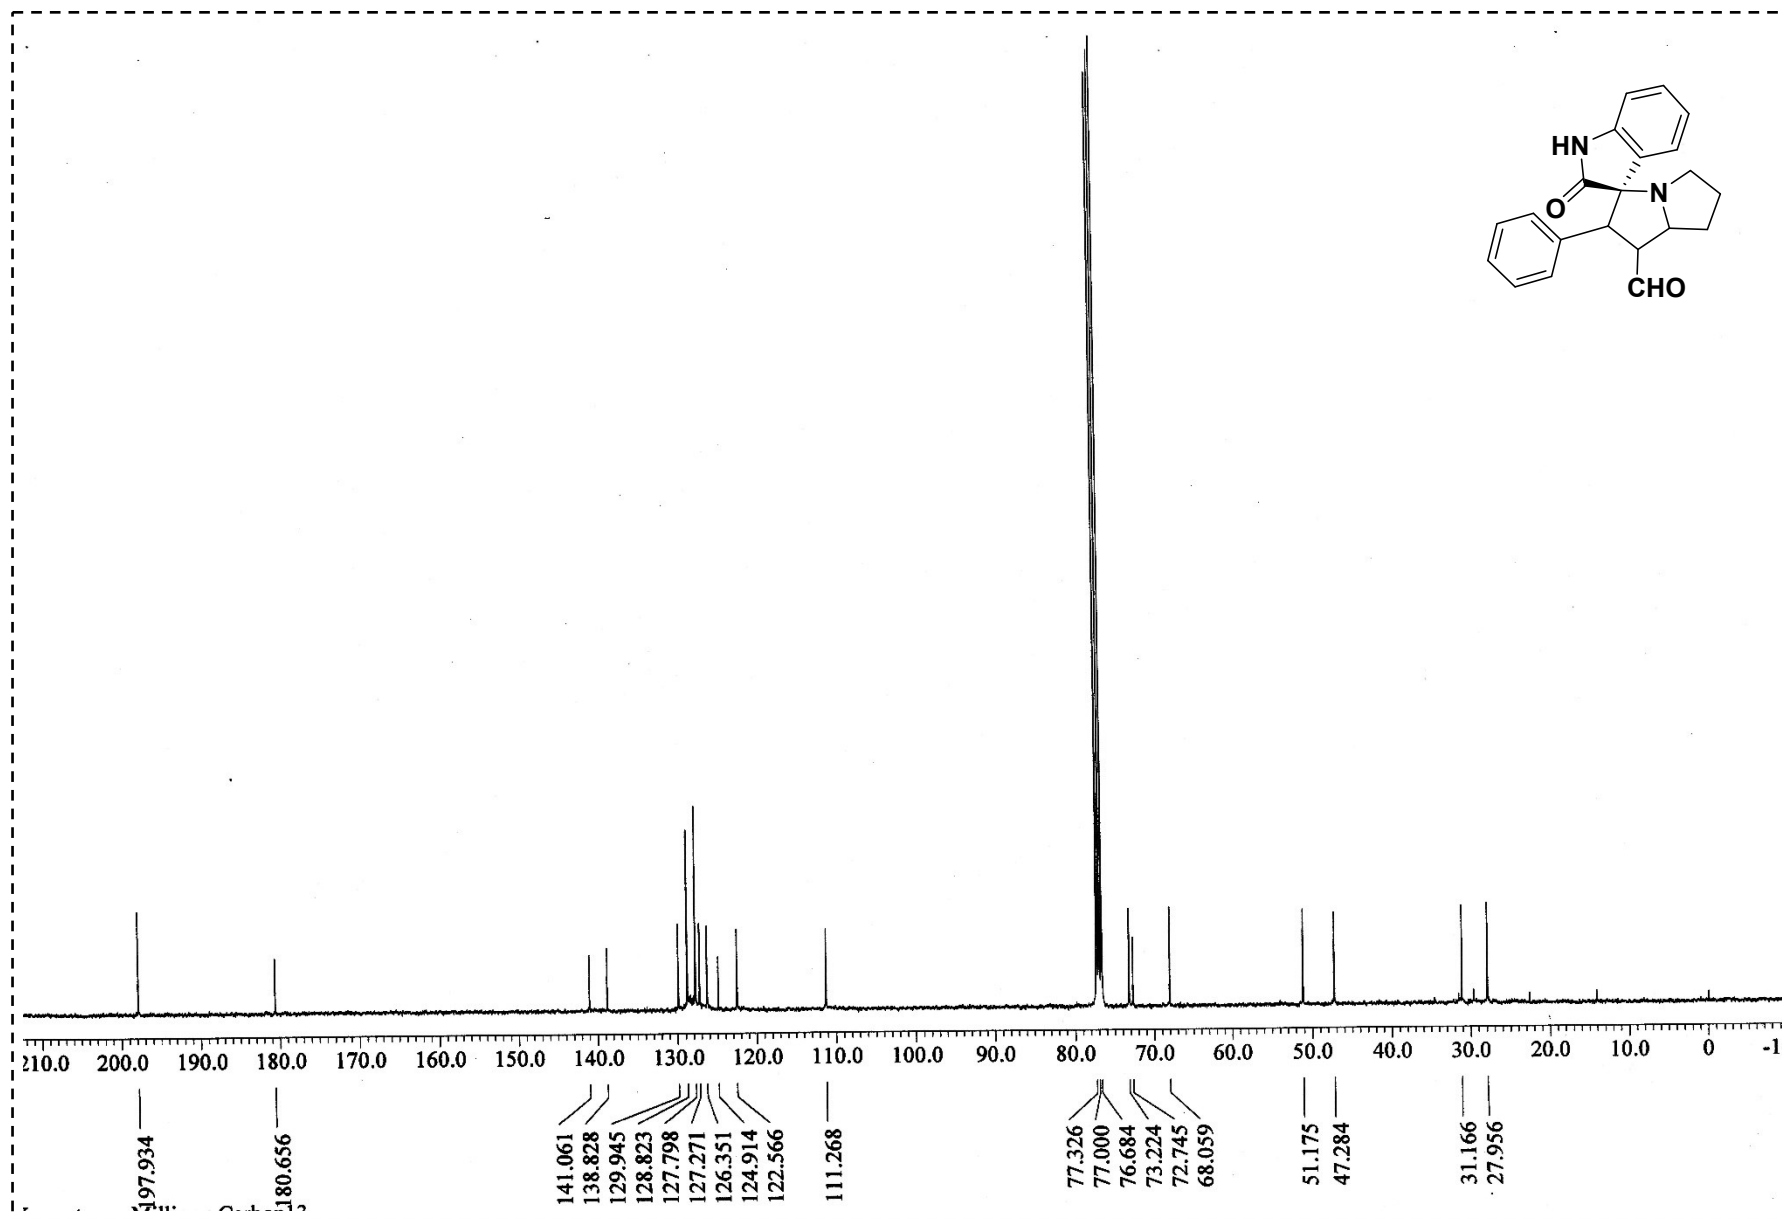

Fig S56.  $^{13}\text{C}$  NMR spectrum of compound 17 in  $\text{CDCl}_3$

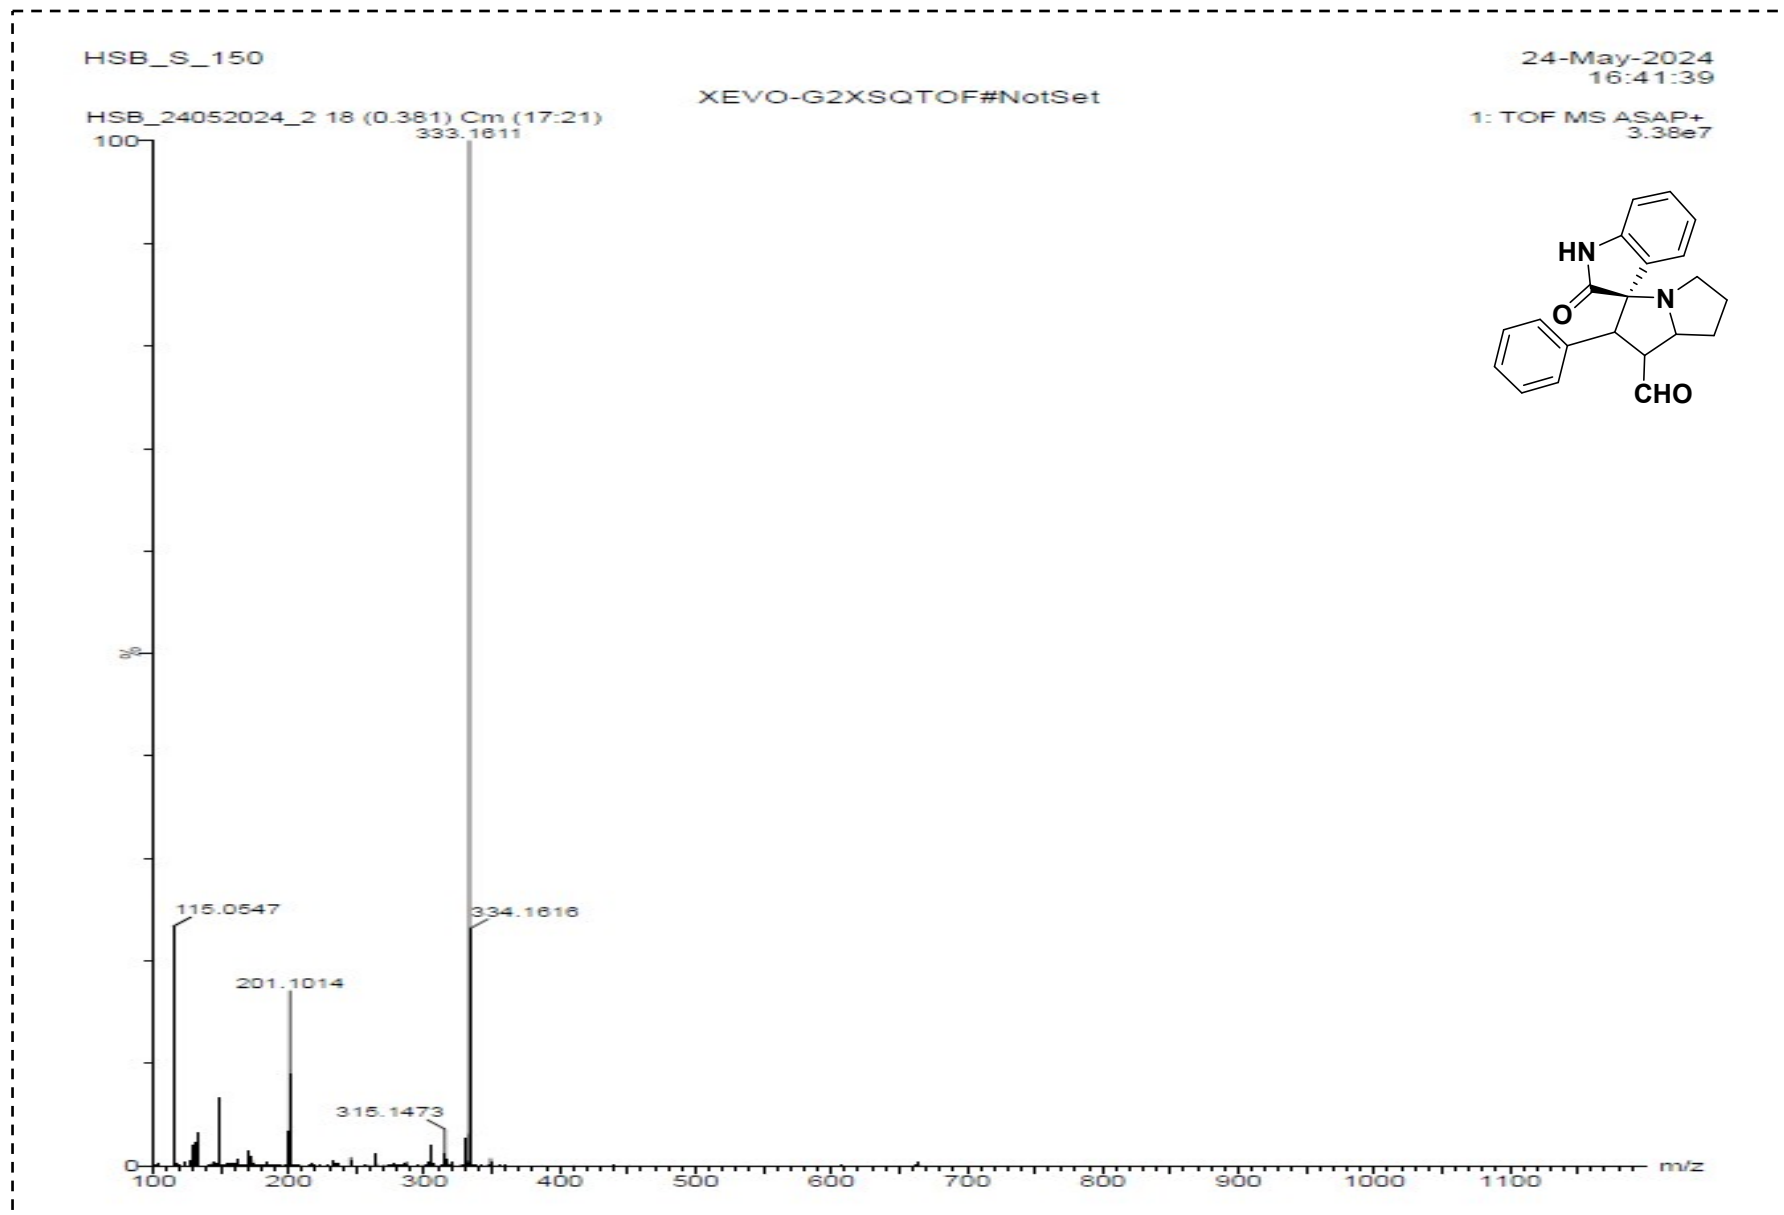

Fig S57. HRMS of compound 17

2.  $^1\text{H}$ ,  $^{13}\text{C}$  NMR and HRMS spectra of synthesized compound **18d**

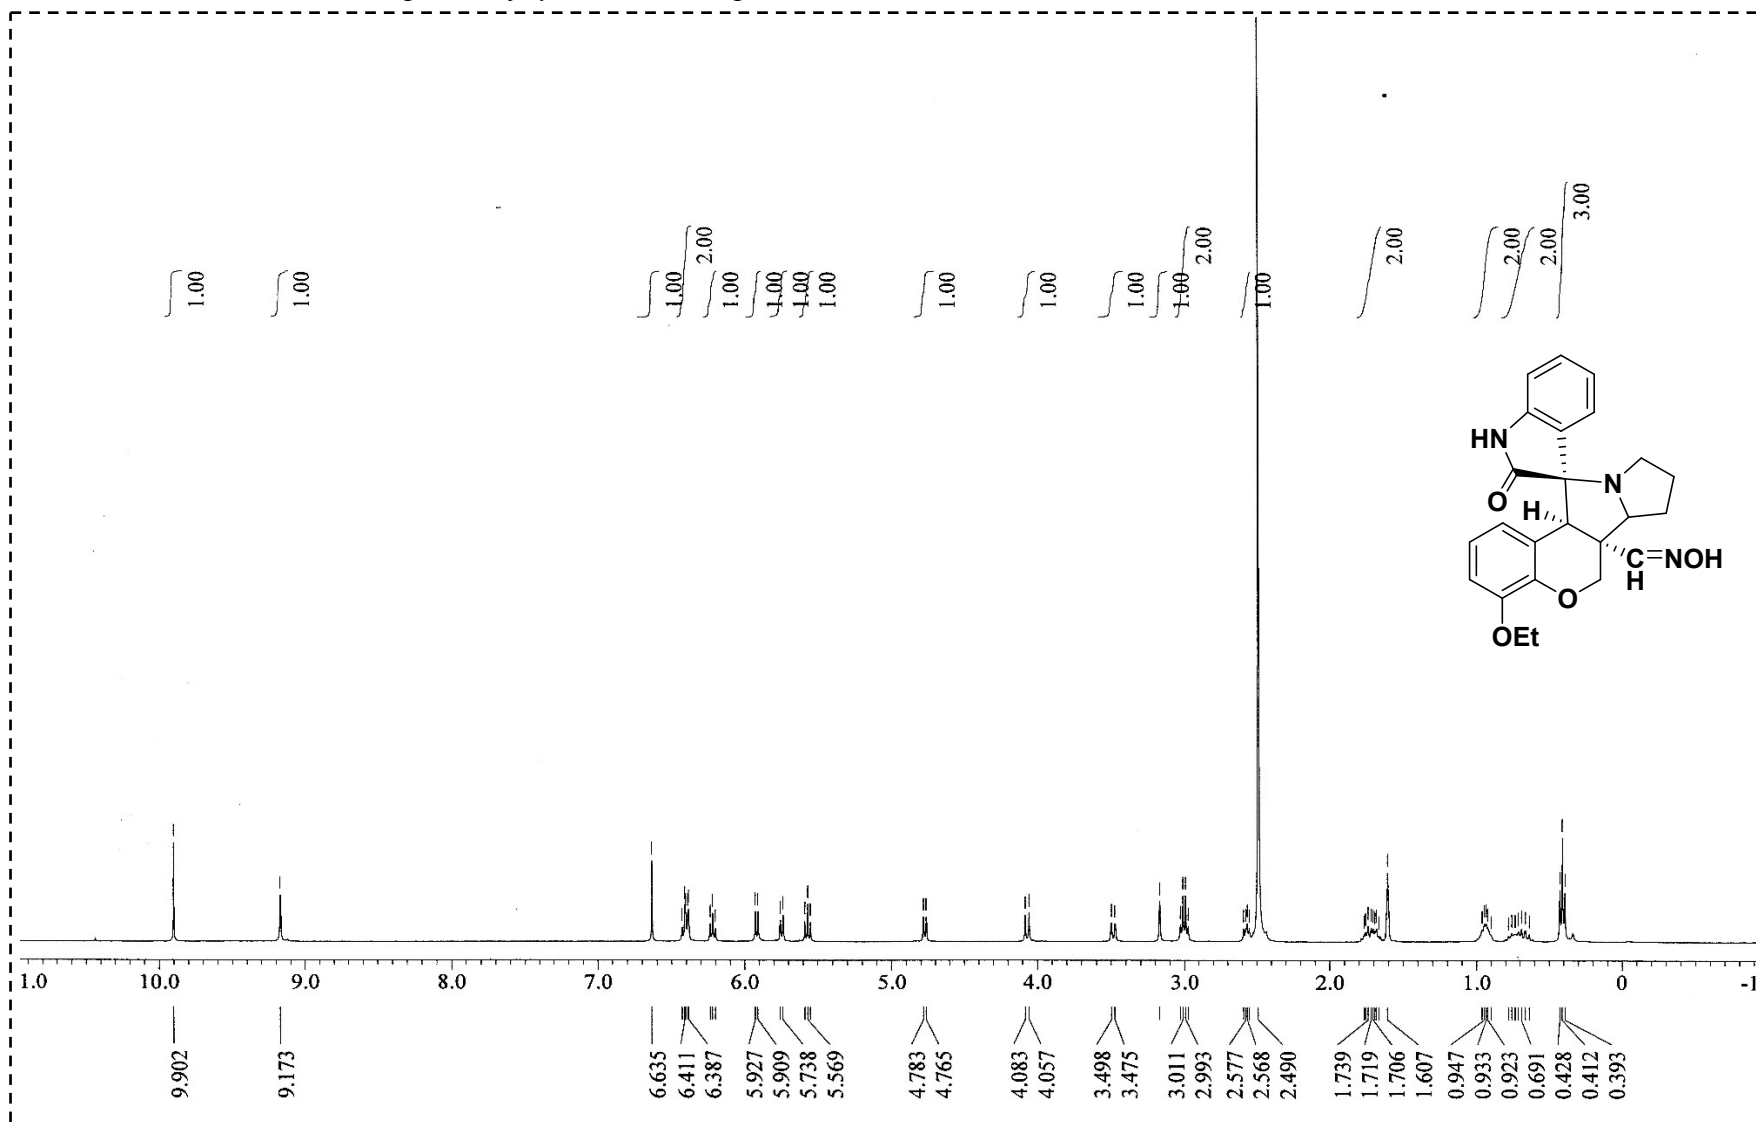

Fig S58.  $^1\text{H}$  NMR spectrum of compound **18d** in DMSO- $d_6$

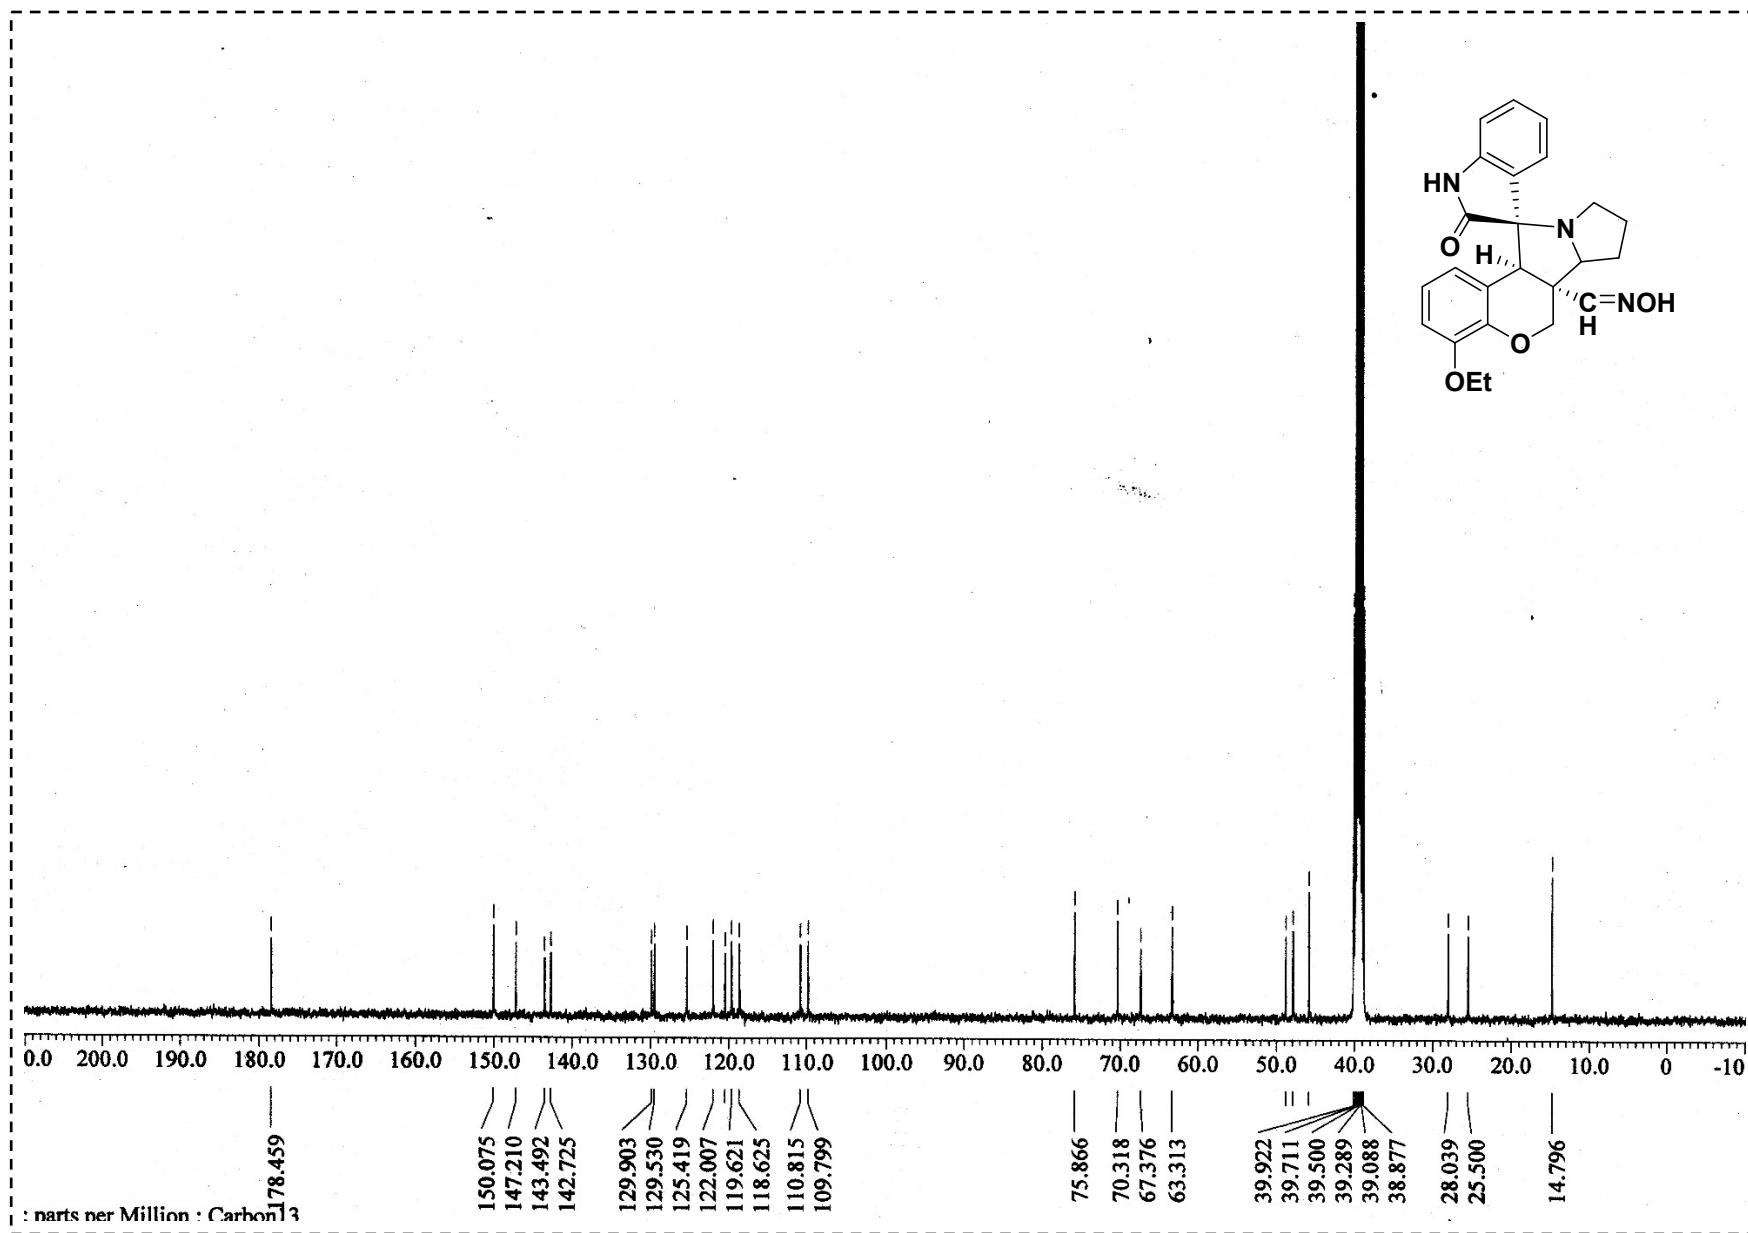

Fig S59. <sup>13</sup>C NMR spectrum of compound 18d in DMSO-d<sub>6</sub>

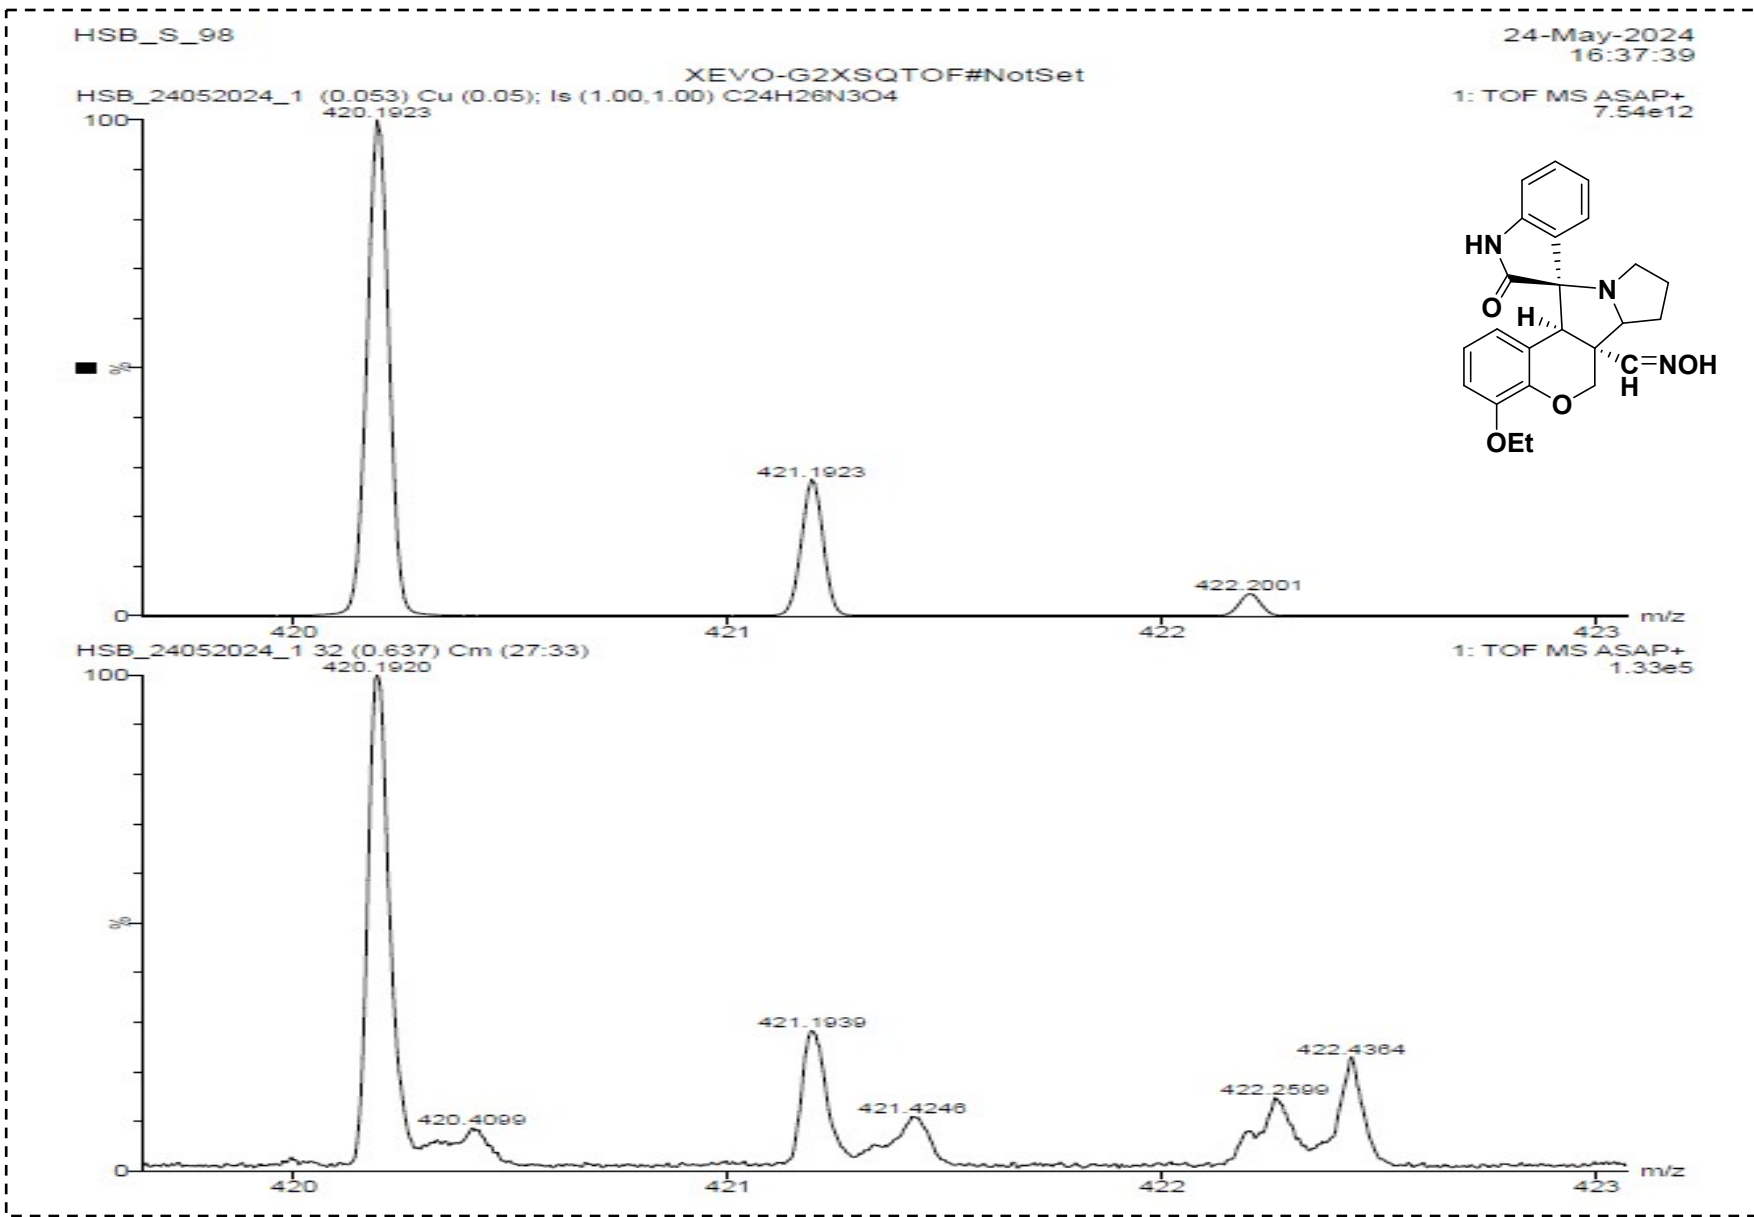

Fig S60. HRMS of compound 18d

3. Co-ordinates of the optimized geometries of all the species:

| Reactant 11, EE+ ZPE= -536.097245 a.u |              |              |              | Radical reactant AY, EE+ ZPE= -648.952276 a.u |              |              |              |
|---------------------------------------|--------------|--------------|--------------|-----------------------------------------------|--------------|--------------|--------------|
| C                                     | -2.858506000 | -1.272305000 | 0.093294000  | C                                             | 2.641357000  | 0.638897000  | -0.141410000 |
| C                                     | -1.511047000 | -1.592165000 | 0.128932000  | N                                             | 1.547693000  | -0.057006000 | -0.042567000 |
| C                                     | -0.538242000 | -0.592392000 | 0.038565000  | C                                             | 0.248581000  | 0.417879000  | -0.024926000 |
| C                                     | -0.947029000 | 0.745710000  | -0.095355000 | C                                             | -0.990480000 | -0.316225000 | -0.023319000 |
| C                                     | -2.297383000 | 1.068148000  | -0.161449000 | C                                             | -2.013043000 | 0.669063000  | 0.038131000  |
| C                                     | -3.245003000 | 0.058689000  | -0.060886000 | C                                             | -3.359440000 | 0.346729000  | 0.051436000  |
| H                                     | 1.231814000  | -1.878309000 | -0.204565000 | C                                             | -3.717426000 | -0.998669000 | -0.002064000 |
| H                                     | -3.606483000 | -2.051483000 | 0.172333000  | C                                             | -2.735527000 | -1.984664000 | -0.075218000 |
| H                                     | -1.193658000 | -2.625257000 | 0.222657000  | C                                             | -1.381587000 | -1.658138000 | -0.089744000 |
| C                                     | 0.884707000  | -0.866069000 | -0.023799000 | C                                             | -0.033884000 | 1.820914000  | 0.021054000  |
| H                                     | -2.586402000 | 2.104687000  | -0.284972000 | H                                             | -4.111985000 | 1.125980000  | 0.100101000  |
| H                                     | -4.297658000 | 0.314389000  | -0.099284000 | H                                             | -0.654213000 | -2.456025000 | -0.160720000 |
| C                                     | 1.762519000  | 0.142463000  | 0.090580000  | C                                             | 1.831985000  | -1.511913000 | 0.030348000  |
| O                                     | -0.037711000 | 1.741756000  | -0.238227000 | H                                             | 2.573021000  | 1.713254000  | -0.230728000 |
| C                                     | 1.226946000  | 1.517245000  | 0.389385000  | H                                             | 1.541915000  | -1.953993000 | -0.924660000 |
| H                                     | 1.884836000  | 2.299956000  | 0.012274000  | N                                             | -1.419594000 | 1.915780000  | 0.068605000  |
| H                                     | 1.110484000  | 1.657340000  | 1.472987000  | H                                             | 1.231532000  | -1.948623000 | 0.825538000  |
| C                                     | 3.210306000  | -0.082264000 | -0.039111000 | O                                             | 0.731432000  | 2.796506000  | 0.029714000  |
|                                       |              |              |              | H                                             | -1.904122000 | 2.796518000  | 0.105572000  |
|                                       |              |              |              | H                                             | -4.765300000 | -1.275682000 | 0.008178000  |

|                                             |              |              |              |                                            |              |              |              |
|---------------------------------------------|--------------|--------------|--------------|--------------------------------------------|--------------|--------------|--------------|
| O                                           | 3.724795000  | -1.168391000 | -0.194974000 | H                                          | -3.026045000 | -3.028202000 | -0.124954000 |
| H                                           | 3.836783000  | 0.829396000  | 0.013240000  | C                                          | 3.335285000  | -1.578982000 | 0.298026000  |
|                                             |              |              |              | C                                          | 3.863133000  | -0.209459000 | -0.160020000 |
|                                             |              |              |              | H                                          | 3.800045000  | -2.409994000 | -0.229437000 |
|                                             |              |              |              | H                                          | 3.514496000  | -1.708969000 | 1.366064000  |
|                                             |              |              |              | H                                          | 4.272912000  | -0.239050000 | -1.176690000 |
|                                             |              |              |              | H                                          | 4.645866000  | 0.188727000  | 0.487983000  |
| Reactant MN-alpha, EE+ ZPE= -767.049273 a.u |              |              |              | Reactant MN-beta, EE+ ZPE= -767.049273 a.u |              |              |              |
| C                                           | 3.850946000  | -0.930333000 | 0.722434000  | C                                          | -3.850897000 | -0.930346000 | 0.722440000  |
| C                                           | 3.093084000  | 0.174229000  | 1.074598000  | C                                          | -3.093079000 | 0.174268000  | 1.074558000  |
| C                                           | 1.952097000  | 0.516597000  | 0.343643000  | C                                          | -1.952097000 | 0.516632000  | 0.343601000  |
| C                                           | 1.583629000  | -0.271993000 | -0.758229000 | C                                          | -1.583608000 | -0.272003000 | -0.758228000 |
| C                                           | 2.350136000  | -1.372119000 | -1.124296000 | C                                          | -2.350041000 | -1.372186000 | -1.124238000 |
| C                                           | 3.477142000  | -1.695937000 | -0.381785000 | C                                          | -3.477050000 | -1.696006000 | -0.381718000 |
| H                                           | 4.730629000  | -1.193996000 | 1.296352000  | H                                          | -4.730585000 | -1.193996000 | 1.296355000  |
| H                                           | 3.376490000  | 0.787858000  | 1.923011000  | H                                          | -3.376527000 | 0.787928000  | 1.922934000  |
| C                                           | 1.137797000  | 1.679785000  | 0.631502000  | C                                          | -1.137812000 | 1.679837000  | 0.631433000  |
| H                                           | 2.051031000  | -1.959035000 | -1.983984000 | H                                          | -2.050896000 | -1.959145000 | -1.983883000 |
| H                                           | 4.068412000  | -2.559042000 | -0.665256000 | H                                          | -4.068275000 | -2.559158000 | -0.665139000 |
| C                                           | -0.052170000 | 1.829986000  | 0.029030000  | C                                          | 0.052156000  | 1.830025000  | 0.028974000  |
| O                                           | 0.522090000  | 0.057612000  | -1.532420000 | O                                          | -0.522042000 | 0.057610000  | -1.532421000 |
|                                             |              |              |              | H                                          | -1.507275000 | 2.428041000  | 1.327295000  |

|                                                                                      |              |              |              |                                                                                      |              |              |              |
|--------------------------------------------------------------------------------------|--------------|--------------|--------------|--------------------------------------------------------------------------------------|--------------|--------------|--------------|
| H                                                                                    | 1.507247000  | 2.427975000  | 1.327385000  | C                                                                                    | 0.882938000  | 3.004138000  | 0.291281000  |
| C                                                                                    | -0.882944000 | 3.004099000  | 0.291320000  | O                                                                                    | 1.962477000  | 3.199612000  | -0.224601000 |
| O                                                                                    | -1.962444000 | 3.199612000  | -0.224641000 | H                                                                                    | 0.454301000  | 3.725911000  | 1.013095000  |
| H                                                                                    | -0.454369000 | 3.725832000  | 1.013210000  | C                                                                                    | 1.510300000  | -0.228166000 | -0.246891000 |
| C                                                                                    | -0.566673000 | 0.765272000  | -0.901886000 | C                                                                                    | 2.483708000  | -0.843394000 | -1.033736000 |
| H                                                                                    | -1.088654000 | 1.240824000  | -1.732571000 | C                                                                                    | 1.396336000  | -0.588611000 | 1.094436000  |
| C                                                                                    | -1.510316000 | -0.228189000 | -0.246906000 | C                                                                                    | 3.329277000  | -1.802707000 | -0.492544000 |
| C                                                                                    | -2.483814000 | -0.843317000 | -1.033735000 | H                                                                                    | 2.579549000  | -0.565948000 | -2.078567000 |
| C                                                                                    | -1.396319000 | -0.588690000 | 1.094401000  | C                                                                                    | 2.239638000  | -1.551675000 | 1.637849000  |
| C                                                                                    | -3.329408000 | -1.802590000 | -0.492542000 | H                                                                                    | 0.652458000  | -0.113636000 | 1.723899000  |
| H                                                                                    | -2.579683000 | -0.565792000 | -2.078541000 | C                                                                                    | 3.206957000  | -2.159891000 | 0.846589000  |
| C                                                                                    | -2.239642000 | -1.551750000 | 1.637812000  | H                                                                                    | 4.085622000  | -2.268913000 | -1.113518000 |
| H                                                                                    | -0.652414000 | -0.113762000 | 1.723868000  | H                                                                                    | 2.142102000  | -1.824001000 | 2.682521000  |
| C                                                                                    | -3.207027000 | -2.159864000 | 0.846572000  | H                                                                                    | 3.866982000  | -2.906957000 | 1.272480000  |
| H                                                                                    | -4.085830000 | -2.268721000 | -1.113480000 | C                                                                                    | 0.566670000  | 0.765294000  | -0.901923000 |
| H                                                                                    | -2.142054000 | -1.824123000 | 2.682466000  | H                                                                                    | 1.088690000  | 1.240852000  | -1.732584000 |
| H                                                                                    | -3.867075000 | -2.906928000 | 1.272433000  |                                                                                      |              |              |              |
| TS-ON, imaginary frequency = -428.64 cm <sup>-1</sup> ,<br>EE+ ZPE= -1185.051252 a.u |              |              |              | TS-OX, imaginary frequency = -435.92 cm <sup>-1</sup> ,<br>EE+ ZPE= -1185.055640 a.u |              |              |              |
| C                                                                                    | -0.634180000 | 1.497034000  | -0.889323000 | C                                                                                    | -0.892813000 | -1.746233000 | -0.931920000 |
| N                                                                                    | 0.693645000  | 1.424336000  | -0.632305000 | N                                                                                    | -0.010596000 | -0.797768000 | -1.328955000 |



|   |              |              |              |   |              |              |              |
|---|--------------|--------------|--------------|---|--------------|--------------|--------------|
| C | 1.404071000  | 0.284621000  | -0.686087000 | C | 1.187525000  | -0.658817000 | -0.735879000 |
| C | 2.764815000  | 0.030426000  | -0.237634000 | C | 2.084478000  | 0.480473000  | -0.732950000 |
| C | 3.103220000  | -1.248494000 | -0.729372000 | C | 3.301324000  | 0.016931000  | -0.190289000 |
| C | 4.312007000  | -1.858022000 | -0.447822000 | C | 4.371636000  | 0.858622000  | 0.052679000  |
| C | 5.219956000  | -1.163259000 | 0.347460000  | C | 4.223106000  | 2.206208000  | -0.265231000 |
| C | 4.911929000  | 0.101142000  | 0.842401000  | C | 3.032034000  | 2.687588000  | -0.803674000 |
| C | 3.688958000  | 0.703338000  | 0.560062000  | C | 1.956234000  | 1.835313000  | -1.034731000 |
| C | 1.006982000  | -0.844073000 | -1.547185000 | C | 1.970076000  | -1.839825000 | -0.294454000 |
| H | 4.542070000  | -2.842798000 | -0.836350000 | H | 5.293709000  | 0.478392000  | 0.475274000  |
| H | 3.482168000  | 1.682981000  | 0.963991000  | H | 1.037688000  | 2.237583000  | -1.437471000 |
| C | 1.237267000  | 2.703049000  | -0.114669000 | C | -0.643179000 | 0.227503000  | -2.180718000 |
| H | -1.030899000 | 0.784509000  | -1.597892000 | H | -0.465263000 | -2.671506000 | -0.576313000 |
| H | 1.944905000  | 3.085159000  | -0.854233000 | H | -0.031574000 | 0.350799000  | -3.075537000 |
| N | 2.048882000  | -1.738815000 | -1.484879000 | N | 3.210342000  | -1.348790000 | 0.033696000  |
| H | 1.738709000  | 2.533478000  | 0.830538000  | H | -0.679219000 | 1.171281000  | -1.639187000 |
| O | -0.010922000 | -1.004617000 | -2.211850000 | O | 1.647469000  | -3.019325000 | -0.247060000 |
| H | 2.043313000  | -2.612171000 | -1.985672000 | H | 3.932981000  | -1.924496000 | 0.433202000  |
| H | 6.177488000  | -1.614456000 | 0.579899000  | H | 5.047534000  | 2.887204000  | -0.088953000 |
| H | 5.631471000  | 0.627226000  | 1.458293000  | H | 2.936713000  | 3.739954000  | -1.042727000 |
| C | 0.001293000  | 3.582723000  | 0.047913000  | C | -2.051201000 | -0.320503000 | -2.463973000 |
| C | -1.033996000 | 2.948305000  | -0.884564000 | C | -2.072536000 | -1.735442000 | -1.856083000 |
| H | 0.209545000  | 4.623794000  | -0.193380000 | H | -2.260918000 | -0.335775000 | -3.532545000 |

|   |              |              |              |   |              |              |              |
|---|--------------|--------------|--------------|---|--------------|--------------|--------------|
| H | -0.345680000 | 3.533166000  | 1.081621000  | H | -2.799626000 | 0.309549000  | -1.983021000 |
| H | -0.956584000 | 3.344654000  | -1.902907000 | H | -1.936184000 | -2.508017000 | -2.618888000 |
| H | -2.054915000 | 3.114533000  | -0.548603000 | H | -3.005712000 | -1.953405000 | -1.336188000 |
| C | -5.105907000 | 0.406036000  | -0.435831000 | C | -4.801259000 | 0.298146000  | 0.457416000  |
| C | -3.826587000 | 0.864588000  | -0.160253000 | C | -3.771921000 | -0.592938000 | 0.734895000  |
| C | -2.823105000 | 0.009442000  | 0.301797000  | C | -2.448534000 | -0.160325000 | 0.808774000  |
| C | -3.155699000 | -1.343131000 | 0.496374000  | C | -2.187006000 | 1.206102000  | 0.645646000  |
| C | -4.444709000 | -1.806160000 | 0.242361000  | C | -3.206095000 | 2.103836000  | 0.361748000  |
| C | -5.414839000 | -0.935301000 | -0.227742000 | C | -4.514030000 | 1.644725000  | 0.256821000  |
| H | -1.454966000 | 1.381048000  | 1.329099000  | H | -5.822894000 | -0.057135000 | 0.395351000  |
| H | -5.861220000 | 1.093371000  | -0.797300000 | H | -3.989596000 | -1.645716000 | 0.883708000  |
| H | -3.608579000 | 1.916858000  | -0.288728000 | C | -1.306776000 | -1.076302000 | 0.998263000  |
| C | -1.479493000 | 0.475756000  | 0.729458000  | H | -2.960885000 | 3.150577000  | 0.226559000  |
| H | -4.662382000 | -2.852880000 | 0.418421000  | H | -5.310755000 | 2.344537000  | 0.032889000  |
| H | -6.413118000 | -1.304798000 | -0.432590000 | O | -0.904944000 | 1.672392000  | 0.694317000  |
| C | -0.565329000 | -0.521179000 | 1.072084000  | C | -0.068827000 | 0.999703000  | 1.637096000  |
| O | -2.261848000 | -2.235301000 | 0.990788000  | H | 0.937080000  | 1.383917000  | 1.473025000  |
| C | -0.897144000 | -1.922340000 | 0.671686000  | H | -0.379468000 | 1.288971000  | 2.652091000  |
| H | -0.287290000 | -2.650408000 | 1.206479000  | C | -0.129154000 | -0.494989000 | 1.496530000  |
| H | -0.780928000 | -2.076987000 | -0.407391000 | C | 0.826016000  | -1.256489000 | 2.258114000  |
| C | 0.550325000  | -0.229287000 | 1.933857000  | O | 1.727049000  | -0.763336000 | 2.925316000  |
| O | 0.820832000  | 0.880329000  | 2.382933000  | H | 0.698093000  | -2.355278000 | 2.211254000  |

|                                                                                      |              |              |              |                                                                                     |              |              |              |
|--------------------------------------------------------------------------------------|--------------|--------------|--------------|-------------------------------------------------------------------------------------|--------------|--------------|--------------|
| H                                                                                    | 1.185697000  | -1.099499000 | 2.192199000  | H                                                                                   | -1.551090000 | -2.083111000 | 1.325218000  |
| TS-MN, imaginary frequency = -351.80 cm <sup>-1</sup> ,<br>EE+ ZPE= -1185.056677 a.u |              |              |              | TS-MX, imaginary frequency = -357.10 cm <sup>-1</sup> ,<br>EE+ ZPE= - 1185.050881.u |              |              |              |
| C                                                                                    | -2.603734000 | -0.345933000 | 0.874617000  | C                                                                                   | 2.280989000  | -1.443575000 | 0.287122000  |
| N                                                                                    | -1.706897000 | -1.186646000 | 0.416193000  | N                                                                                   | 1.041554000  | -1.429322000 | 0.745112000  |
| C                                                                                    | -0.339549000 | -0.936174000 | 0.458942000  | C                                                                                   | -0.040937000 | -1.254120000 | -0.104746000 |
| C                                                                                    | 0.670087000  | -1.890813000 | -0.026761000 | C                                                                                   | -1.431157000 | -1.198415000 | 0.371506000  |
| C                                                                                    | 1.777029000  | -1.782436000 | 0.829922000  | C                                                                                   | -2.224652000 | -1.812602000 | -0.610793000 |
| C                                                                                    | 2.969392000  | -2.439789000 | 0.587385000  | C                                                                                   | -3.605394000 | -1.834391000 | -0.543143000 |
| C                                                                                    | 3.050375000  | -3.231267000 | -0.555790000 | C                                                                                   | -4.208008000 | -1.224649000 | 0.555830000  |
| C                                                                                    | 1.970183000  | -3.343303000 | -1.426991000 | C                                                                                   | -3.442974000 | -0.603453000 | 1.537542000  |
| C                                                                                    | 0.778699000  | -2.665908000 | -1.174930000 | C                                                                                   | -2.053130000 | -0.573008000 | 1.443724000  |
| C                                                                                    | 0.203086000  | -0.400329000 | 1.747158000  | C                                                                                   | -0.075039000 | -2.103682000 | -1.338432000 |
| H                                                                                    | 3.813390000  | -2.330981000 | 1.257405000  | H                                                                                   | -4.195774000 | -2.308236000 | -1.317904000 |
| H                                                                                    | -0.037187000 | -2.742890000 | -1.882170000 | H                                                                                   | -1.481365000 | -0.046649000 | 2.196179000  |
| C                                                                                    | -2.313544000 | -2.184962000 | -0.488379000 | C                                                                                   | 0.983446000  | -1.195298000 | 2.202072000  |
| H                                                                                    | -2.316805000 | 0.408699000  | 1.587787000  | H                                                                                   | 2.464042000  | -1.809380000 | -0.708946000 |
| H                                                                                    | -1.853565000 | -3.156836000 | -0.320480000 | H                                                                                   | 0.250426000  | -1.871124000 | 2.640961000  |
| N                                                                                    | 1.468685000  | -0.904911000 | 1.864344000  | N                                                                                   | -1.400214000 | -2.320124000 | -1.612036000 |
| H                                                                                    | -2.123498000 | -1.873082000 | -1.519340000 | H                                                                                   | 0.667021000  | -0.169819000 | 2.396649000  |
| O                                                                                    | -0.341056000 | 0.336399000  | 2.554027000  | O                                                                                   | 0.861017000  | -2.512319000 | -2.005594000 |
| H                                                                                    | 2.088380000  | -0.646274000 | 2.615093000  | H                                                                                   | -1.711500000 | -2.835955000 | -2.419264000 |

|   |              |              |              |   |              |              |              |
|---|--------------|--------------|--------------|---|--------------|--------------|--------------|
| H | 3.971769000  | -3.759296000 | -0.771638000 | H | -5.288579000 | -1.230642000 | 0.638990000  |
| H | 2.056909000  | -3.956163000 | -2.316050000 | H | -3.930906000 | -0.122803000 | 2.376830000  |
| C | -3.800195000 | -2.132335000 | -0.128494000 | C | 2.418967000  | -1.467273000 | 2.667357000  |
| C | -3.991835000 | -0.757342000 | 0.540152000  | C | 3.282404000  | -1.401501000 | 1.390345000  |
| H | -4.037502000 | -2.927967000 | 0.578398000  | H | 2.483346000  | -2.461665000 | 3.109089000  |
| H | -4.426181000 | -2.261991000 | -1.009349000 | H | 2.732816000  | -0.744566000 | 3.418824000  |
| H | -4.617310000 | -0.799133000 | 1.433577000  | H | 3.985544000  | -2.232463000 | 1.314589000  |
| H | -4.437082000 | -0.009600000 | -0.126755000 | H | 3.872302000  | -0.482726000 | 1.319401000  |
| C | 3.465841000  | 1.450439000  | -0.767811000 | C | -2.588966000 | 2.625815000  | -0.580754000 |
| C | 2.263595000  | 0.784596000  | -0.946248000 | C | -1.747528000 | 1.588587000  | -0.947676000 |
| C | 1.044919000  | 1.366762000  | -0.583273000 | C | -0.394329000 | 1.581793000  | -0.597009000 |
| C | 1.056961000  | 2.679945000  | -0.084777000 | C | 0.108488000  | 2.682620000  | 0.113131000  |
| C | 2.265031000  | 3.355441000  | 0.089320000  | C | -0.732745000 | 3.731346000  | 0.484592000  |
| C | 3.461833000  | 2.739384000  | -0.239871000 | C | -2.075977000 | 3.698307000  | 0.145465000  |
| H | 4.397250000  | 0.974107000  | -1.049412000 | H | -3.635259000 | 2.601440000  | -0.860521000 |
| H | 2.259159000  | -0.205310000 | -1.388097000 | H | -2.138841000 | 0.760935000  | -1.528878000 |
| C | -0.254854000 | 0.703675000  | -0.821667000 | H | -0.308253000 | 4.567181000  | 1.028230000  |
| H | 2.239375000  | 4.368142000  | 0.474006000  | H | -2.722533000 | 4.516330000  | 0.442506000  |
| H | 4.394407000  | 3.273037000  | -0.095010000 | O | 1.424245000  | 2.822031000  | 0.406831000  |
| C | -1.404924000 | 1.480351000  | -0.584287000 | C | 1.900351000  | 0.712156000  | -0.730367000 |
| O | -0.071547000 | 3.378211000  | 0.177306000  | C | 2.929595000  | 0.426290000  | -1.690477000 |
| H | -0.274196000 | 0.058211000  | -1.697872000 | O | 4.107243000  | 0.754723000  | -1.605623000 |

|                                       |              |              |              |                                       |              |              |              |
|---------------------------------------|--------------|--------------|--------------|---------------------------------------|--------------|--------------|--------------|
| C                                     | -2.570050000 | 1.318837000  | -1.384654000 | H                                     | 2.580645000  | -0.170719000 | -2.559503000 |
| O                                     | -3.592802000 | 2.005741000  | -1.355415000 | C                                     | 0.536875000  | 0.532666000  | -1.062222000 |
| H                                     | -2.507471000 | 0.467736000  | -2.099359000 | H                                     | 0.335016000  | 0.181075000  | -2.070826000 |
| C                                     | -1.281158000 | 2.626972000  | 0.372991000  | C                                     | 2.203320000  | 1.618354000  | 0.424873000  |
| H                                     | -1.281958000 | 2.294095000  | 1.415969000  | H                                     | 3.244971000  | 1.933073000  | 0.384187000  |
| H                                     | -2.100285000 | 3.328717000  | 0.222872000  | H                                     | 2.025873000  | 1.141542000  | 1.395330000  |
| Product-ON, EE+ ZPE= -1185.097943 a.u |              |              |              | Product-OX, EE+ ZPE= -1185.098913 a.u |              |              |              |
| C                                     | -0.772563000 | 1.534317000  | -0.893959000 | C                                     | -0.860344000 | -1.607639000 | -1.021266000 |
| N                                     | 0.690153000  | 1.392035000  | -0.879202000 | N                                     | 0.241510000  | -0.706767000 | -1.357511000 |
| C                                     | 0.999676000  | 0.052920000  | -0.403421000 | C                                     | 1.023022000  | -0.538112000 | -0.135622000 |
| C                                     | 2.431276000  | -0.196474000 | 0.043560000  | C                                     | 2.004008000  | 0.618169000  | -0.176849000 |
| C                                     | 3.038454000  | -1.074079000 | -0.857983000 | C                                     | 3.296045000  | 0.102436000  | -0.313129000 |
| C                                     | 4.347744000  | -1.498948000 | -0.719254000 | C                                     | 4.415243000  | 0.908534000  | -0.410326000 |
| C                                     | 5.070170000  | -1.020990000 | 0.371277000  | C                                     | 4.222911000  | 2.288079000  | -0.365797000 |
| C                                     | 4.488047000  | -0.153772000 | 1.287827000  | C                                     | 2.949453000  | 2.825635000  | -0.226239000 |
| C                                     | 3.165429000  | 0.259387000  | 1.128335000  | C                                     | 1.833569000  | 1.992493000  | -0.132154000 |
| C                                     | 0.918177000  | -0.839596000 | -1.687855000 | C                                     | 1.991334000  | -1.761584000 | -0.137415000 |
| H                                     | 4.793004000  | -2.179757000 | -1.434239000 | H                                     | 5.404866000  | 0.480976000  | -0.514955000 |
| H                                     | 2.732666000  | 0.928350000  | 1.861525000  | H                                     | 0.848038000  | 2.423528000  | -0.015901000 |
| C                                     | 1.310638000  | 2.601616000  | -0.306925000 | C                                     | -0.319265000 | 0.491532000  | -2.013268000 |
| H                                     | -1.181301000 | 1.156615000  | -1.832536000 | H                                     | -0.484927000 | -2.629214000 | -0.968538000 |
| H                                     | 1.867280000  | 3.123600000  | -1.092449000 | H                                     | 0.377742000  | 0.848329000  | -2.774200000 |

|   |              |              |              |   |              |              |              |
|---|--------------|--------------|--------------|---|--------------|--------------|--------------|
| N | 2.132739000  | -1.429065000 | -1.856925000 | N | 3.251652000  | -1.292785000 | -0.323695000 |
| H | 2.017492000  | 2.371164000  | 0.487276000  | H | -0.484885000 | 1.308789000  | -1.307717000 |
| O | -0.033390000 | -0.962412000 | -2.427972000 | O | 1.675363000  | -2.926709000 | -0.010389000 |
| H | 2.346036000  | -2.013317000 | -2.650306000 | H | 4.056929000  | -1.897408000 | -0.365768000 |
| H | 6.098667000  | -1.335198000 | 0.505052000  | H | 5.081357000  | 2.945800000  | -0.438149000 |
| H | 5.060934000  | 0.205628000  | 2.133635000  | H | 2.817362000  | 3.900144000  | -0.188334000 |
| C | 0.145703000  | 3.459752000  | 0.191363000  | C | -1.666215000 | 0.035277000  | -2.609258000 |
| C | -1.008017000 | 3.035035000  | -0.719954000 | C | -1.823285000 | -1.436160000 | -2.187616000 |
| H | 0.362700000  | 4.527338000  | 0.136624000  | H | -1.686889000 | 0.142323000  | -3.694503000 |
| H | -0.080966000 | 3.210409000  | 1.231243000  | H | -2.477752000 | 0.641405000  | -2.202151000 |
| H | -0.936092000 | 3.536608000  | -1.689178000 | H | -1.500813000 | -2.100410000 | -2.992407000 |
| H | -1.990674000 | 3.253311000  | -0.298237000 | H | -2.851151000 | -1.697152000 | -1.938810000 |
| C | -4.957343000 | 0.056283000  | -0.600573000 | C | -4.825122000 | 0.215427000  | 0.155781000  |
| C | -3.696678000 | 0.638408000  | -0.547541000 | C | -3.773295000 | -0.684809000 | 0.249743000  |
| C | -2.631362000 | -0.001534000 | 0.084034000  | C | -2.467683000 | -0.254495000 | 0.489765000  |
| C | -2.863709000 | -1.261058000 | 0.641998000  | C | -2.267146000 | 1.106541000  | 0.711926000  |
| C | -4.121215000 | -1.850975000 | 0.605394000  | C | -3.305334000 | 2.024933000  | 0.611786000  |
| C | -5.172198000 | -1.184704000 | -0.009884000 | C | -4.584524000 | 1.577521000  | 0.316448000  |
| H | -1.393537000 | 1.321572000  | 1.147958000  | H | -5.828474000 | -0.142479000 | -0.042029000 |
| H | -5.770692000 | 0.573503000  | -1.095733000 | H | -3.960080000 | -1.745976000 | 0.119641000  |
| H | -3.542850000 | 1.614185000  | -0.995055000 | C | -1.307059000 | -1.221355000 | 0.434032000  |
| C | -1.291672000 | 0.663031000  | 0.279496000  | H | -3.095386000 | 3.074549000  | 0.779866000  |

|                                       |              |              |              |                                       |              |              |              |
|---------------------------------------|--------------|--------------|--------------|---------------------------------------|--------------|--------------|--------------|
| H                                     | -4.254201000 | -2.828995000 | 1.052613000  | H                                     | -5.397845000 | 2.289443000  | 0.236898000  |
| H                                     | -6.154063000 | -1.642757000 | -0.041005000 | O                                     | -1.023084000 | 1.576194000  | 1.032314000  |
| C                                     | -0.156231000 | -0.322894000 | 0.624125000  | C                                     | -0.278902000 | 0.655654000  | 1.811900000  |
| O                                     | -1.842282000 | -1.951862000 | 1.238924000  | H                                     | 0.655252000  | 1.145768000  | 2.077624000  |
| C                                     | -0.611900000 | -1.781529000 | 0.542909000  | H                                     | -0.838154000 | 0.450174000  | 2.732892000  |
| H                                     | 0.106131000  | -2.452034000 | 1.018833000  | C                                     | -0.007351000 | -0.663523000 | 1.074986000  |
| H                                     | -0.753120000 | -2.089144000 | -0.494151000 | C                                     | 0.553294000  | -1.581647000 | 2.156420000  |
| C                                     | 0.345001000  | -0.095987000 | 2.046746000  | O                                     | 1.566271000  | -1.322180000 | 2.754599000  |
| O                                     | 0.138433000  | 0.888970000  | 2.706948000  | H                                     | -0.042744000 | -2.480980000 | 2.400405000  |
| H                                     | 0.945679000  | -0.928698000 | 2.459518000  | H                                     | -1.613111000 | -2.136643000 | 0.949293000  |
| Product-MN, EE+ ZPE= -1185.107567 a.u |              |              |              | Product-MX, EE+ ZPE= -1185.107741 a.u |              |              |              |
| C                                     | -1.324799000 | -1.923263000 | 0.720341000  | C                                     | 2.477078000  | -0.728704000 | -0.236418000 |
| N                                     | 0.132428000  | -1.977417000 | 0.563709000  | N                                     | 1.326336000  | -1.626607000 | -0.126350000 |
| C                                     | 0.595506000  | -0.607773000 | 0.364447000  | C                                     | 0.101969000  | -0.982276000 | -0.559372000 |
| C                                     | 1.989902000  | -0.469406000 | -0.202518000 | C                                     | -1.113169000 | -1.136321000 | 0.334664000  |
| C                                     | 2.810903000  | 0.130863000  | 0.752261000  | C                                     | -2.105961000 | -1.814632000 | -0.375251000 |
| C                                     | 4.137909000  | 0.430113000  | 0.502704000  | C                                     | -3.351538000 | -2.084673000 | 0.162565000  |
| C                                     | 4.642188000  | 0.114373000  | -0.758218000 | C                                     | -3.601258000 | -1.650397000 | 1.462872000  |
| C                                     | 3.835404000  | -0.466693000 | -1.730422000 | C                                     | -2.632279000 | -0.964641000 | 2.185843000  |
| C                                     | 2.497874000  | -0.755292000 | -1.456767000 | C                                     | -1.384736000 | -0.701839000 | 1.620030000  |
| C                                     | 0.762707000  | 0.028409000  | 1.774796000  | C                                     | -0.381958000 | -1.667667000 | -1.872304000 |
| H                                     | 4.758936000  | 0.900321000  | 1.255241000  | H                                     | -4.107097000 | -2.608979000 | -0.409727000 |

|   |              |              |              |   |              |              |              |
|---|--------------|--------------|--------------|---|--------------|--------------|--------------|
| H | 1.871317000  | -1.189960000 | -2.226478000 | H | -0.651087000 | -0.149882000 | 2.193215000  |
| C | 0.399468000  | -2.949197000 | -0.500526000 | C | 1.423305000  | -2.452842000 | 1.069632000  |
| H | -1.563182000 | -1.707386000 | 1.762084000  | H | 2.943459000  | -0.854463000 | -1.221640000 |
| H | 1.445027000  | -3.257697000 | -0.490329000 | H | 0.929133000  | -3.416189000 | 0.921822000  |
| N | 2.068466000  | 0.395680000  | 1.904522000  | N | -1.646488000 | -2.126455000 | -1.659137000 |
| H | 0.170847000  | -2.553620000 | -1.504547000 | H | 0.979509000  | -1.983657000 | 1.960234000  |
| O | -0.090084000 | 0.154097000  | 2.627203000  | O | 0.258245000  | -1.770260000 | -2.895086000 |
| H | 2.431555000  | 0.823326000  | 2.741821000  | H | -2.180258000 | -2.617740000 | -2.358903000 |
| H | 5.678758000  | 0.336495000  | -0.983678000 | H | -4.568532000 | -1.846776000 | 1.910658000  |
| H | 4.244252000  | -0.692246000 | -2.707724000 | H | -2.845986000 | -0.626760000 | 3.192497000  |
| C | -0.569143000 | -4.071858000 | -0.157134000 | C | 2.934771000  | -2.581152000 | 1.236254000  |
| C | -1.828781000 | -3.326865000 | 0.324710000  | C | 3.444825000  | -1.179374000 | 0.868220000  |
| H | -0.154192000 | -4.677891000 | 0.650999000  | H | 3.322652000  | -3.322634000 | 0.533004000  |
| H | -0.763238000 | -4.724407000 | -1.008991000 | H | 3.219464000  | -2.881238000 | 2.245430000  |
| H | -2.290454000 | -3.824029000 | 1.177576000  | H | 4.480326000  | -1.178687000 | 0.528142000  |
| H | -2.587084000 | -3.286064000 | -0.458389000 | H | 3.386899000  | -0.529412000 | 1.743356000  |
| C | 0.355130000  | 3.786770000  | -0.684810000 | C | -2.599154000 | 2.635559000  | -1.042309000 |
| C | 0.460752000  | 2.404322000  | -0.703612000 | C | -1.638460000 | 1.688005000  | -1.355302000 |
| C | -0.627253000 | 1.584075000  | -0.393061000 | C | -0.479785000 | 1.547442000  | -0.590276000 |
| C | -1.840699000 | 2.197367000  | -0.067983000 | C | -0.296391000 | 2.391338000  | 0.503592000  |
| C | -1.958411000 | 3.586557000  | -0.058616000 | C | -1.251968000 | 3.357746000  | 0.819890000  |
| C | -0.864482000 | 4.378243000  | -0.366060000 | C | -2.397948000 | 3.475062000  | 0.052261000  |



|                                                                               |              |              |              |                                                                              |              |              |              |
|-------------------------------------------------------------------------------|--------------|--------------|--------------|------------------------------------------------------------------------------|--------------|--------------|--------------|
| H                                                                             | 1.215521000  | 4.398804000  | -0.927467000 | H                                                                            | -3.494099000 | 2.725175000  | -1.646012000 |
| H                                                                             | 1.403904000  | 1.946112000  | -0.980057000 | H                                                                            | -1.782251000 | 1.034301000  | -2.210537000 |
| C                                                                             | -0.525572000 | 0.079833000  | -0.482183000 | H                                                                            | -1.075801000 | 4.000835000  | 1.673966000  |
| H                                                                             | -2.917906000 | 4.021407000  | 0.195313000  | H                                                                            | -3.138450000 | 4.224044000  | 0.308528000  |
| H                                                                             | -0.962650000 | 5.457686000  | -0.353300000 | O                                                                            | 0.806964000  | 2.352058000  | 1.296173000  |
| C                                                                             | -1.824823000 | -0.662311000 | -0.101898000 | C                                                                            | 1.878307000  | 0.704927000  | -0.189627000 |
| O                                                                             | -2.961956000 | 1.483180000  | 0.216636000  | C                                                                            | 2.763943000  | 1.645352000  | -0.980446000 |
| H                                                                             | -0.282671000 | -0.167180000 | -1.522720000 | O                                                                            | 3.375650000  | 2.569527000  | -0.513276000 |
| C                                                                             | -2.551231000 | -1.077820000 | -1.365434000 | H                                                                            | 2.840419000  | 1.401550000  | -2.060216000 |
| O                                                                             | -3.740753000 | -1.006157000 | -1.532918000 | C                                                                            | 0.536037000  | 0.492411000  | -0.912596000 |
| H                                                                             | -1.897188000 | -1.488024000 | -2.163797000 | H                                                                            | 0.728902000  | 0.496964000  | -1.990968000 |
| C                                                                             | -2.723637000 | 0.198132000  | 0.778761000  | C                                                                            | 1.655740000  | 1.213201000  | 1.225824000  |
| H                                                                             | -2.255264000 | 0.320012000  | 1.758004000  | H                                                                            | 2.596210000  | 1.539662000  | 1.666245000  |
| H                                                                             | -3.703662000 | -0.263944000 | 0.888772000  | H                                                                            | 1.242570000  | 0.415577000  | 1.850336000  |
| TS-MN-alpha, imaginary frequency = -350.86 cm-1,<br>EE+ ZPE= -1415.999365 a.u |              |              |              | TS-MN-beta, imaginary frequency = -345.57 cm-1,<br>EE+ ZPE= -1416.003571 a.u |              |              |              |
| C                                                                             | -0.582887000 | 2.236291000  | -0.717938000 | C                                                                            | -1.147675000 | -1.821561000 | 0.543862000  |
| N                                                                             | 0.664689000  | 2.149589000  | -0.324441000 | N                                                                            | 0.140698000  | -2.021974000 | 0.399738000  |
| C                                                                             | 1.414408000  | 0.981053000  | -0.430319000 | C                                                                            | 1.074239000  | -0.994777000 | 0.488802000  |
| C                                                                             | 2.825515000  | 0.896589000  | -0.016479000 | C                                                                            | 2.518972000  | -1.178677000 | 0.283885000  |
| C                                                                             | 3.468815000  | 0.049139000  | -0.931711000 | C                                                                            | 3.167105000  | -0.273761000 | 1.140118000  |
| C                                                                             | 4.777640000  | -0.365242000 | -0.765652000 | C                                                                            | 4.535392000  | -0.074500000 | 1.108497000  |

|   |              |              |              |   |              |              |              |
|---|--------------|--------------|--------------|---|--------------|--------------|--------------|
| C | 5.460977000  | 0.088878000  | 0.359857000  | C | 5.274848000  | -0.807011000 | 0.183191000  |
| C | 4.839677000  | 0.920245000  | 1.287869000  | C | 4.652226000  | -1.698018000 | -0.686552000 |
| C | 3.516209000  | 1.319896000  | 1.112231000  | C | 3.270896000  | -1.880147000 | -0.650727000 |
| C | 1.342187000  | 0.262663000  | -1.743009000 | C | 0.949388000  | -0.069797000 | 1.655313000  |
| H | 5.248498000  | -1.029089000 | -1.480303000 | H | 5.011133000  | 0.635602000  | 1.773869000  |
| H | 3.043380000  | 1.941197000  | 1.862033000  | H | 2.805397000  | -2.559276000 | -1.353692000 |
| C | 1.024819000  | 3.260666000  | 0.580824000  | C | 0.422012000  | -3.321487000 | -0.243104000 |
| H | -0.970917000 | 1.523552000  | -1.425976000 | H | -1.504686000 | -0.940097000 | 1.047226000  |
| H | 2.035519000  | 3.597947000  | 0.359165000  | H | 1.297719000  | -3.774442000 | 0.218213000  |
| N | 2.571149000  | -0.302768000 | -1.935020000 | N | 2.219086000  | 0.358224000  | 1.936938000  |
| H | 0.989768000  | 2.890404000  | 1.609069000  | H | 0.628563000  | -3.146487000 | -1.302350000 |
| O | 0.398598000  | 0.179568000  | -2.513708000 | O | -0.057619000 | 0.254815000  | 2.261424000  |
| H | 2.776710000  | -0.899443000 | -2.720062000 | H | 2.416072000  | 1.046708000  | 2.644900000  |
| H | 6.488438000  | -0.217847000 | 0.516573000  | H | 6.349267000  | -0.673021000 | 0.136910000  |
| H | 5.385889000  | 1.254657000  | 2.161542000  | H | 5.244326000  | -2.251958000 | -1.405006000 |
| C | -0.055673000 | 4.308703000  | 0.302175000  | C | -0.873835000 | -4.106989000 | -0.026595000 |
| C | -1.222566000 | 3.512142000  | -0.312920000 | C | -1.949081000 | -3.027892000 | 0.208477000  |
| H | 0.316123000  | 5.041309000  | -0.414959000 | H | -0.779545000 | -4.737867000 | 0.857981000  |
| H | -0.340145000 | 4.835603000  | 1.211028000  | H | -1.098263000 | -4.746169000 | -0.878496000 |
| H | -1.686274000 | 4.013313000  | -1.164143000 | H | -2.643251000 | -3.280008000 | 1.011819000  |
| H | -2.020795000 | 3.292212000  | 0.407398000  | H | -2.552460000 | -2.822499000 | -0.683591000 |
| C | 2.358895000  | -3.451645000 | 0.657524000  | C | 2.908763000  | 3.038473000  | -0.878744000 |

|   |              |              |              |   |              |              |              |
|---|--------------|--------------|--------------|---|--------------|--------------|--------------|
| C | 2.035626000  | -2.120788000 | 0.868144000  | C | 2.398412000  | 1.777376000  | -1.157200000 |
| C | 0.756780000  | -1.628483000 | 0.587332000  | C | 1.060590000  | 1.477361000  | -0.903284000 |
| C | -0.218007000 | -2.530954000 | 0.139631000  | C | 0.227213000  | 2.479293000  | -0.398587000 |
| C | 0.099301000  | -3.873312000 | -0.065399000 | C | 0.730387000  | 3.743445000  | -0.114350000 |
| C | 1.385015000  | -4.326941000 | 0.181595000  | C | 2.073283000  | 4.015390000  | -0.345605000 |
| H | 3.358578000  | -3.807894000 | 0.875309000  | H | 3.951998000  | 3.256669000  | -1.073247000 |
| H | 2.780031000  | -1.445796000 | 1.274203000  | H | 3.042550000  | 1.004844000  | -1.564308000 |
| C | 0.354424000  | -0.236517000 | 0.874473000  | C | 0.475463000  | 0.147529000  | -1.131353000 |
| H | -0.679648000 | -4.542986000 | -0.410076000 | H | 0.061149000  | 4.496873000  | 0.283733000  |
| H | 1.624478000  | -5.370877000 | 0.013709000  | H | 2.463572000  | 5.001551000  | -0.121015000 |
| C | -1.017701000 | 0.078246000  | 0.742164000  | C | -0.926523000 | 0.068536000  | -1.270299000 |
| O | -1.510275000 | -2.174874000 | -0.043654000 | O | -1.078521000 | 2.238510000  | -0.122483000 |
| H | 0.860835000  | 0.197524000  | 1.734374000  | H | 1.056084000  | -0.491445000 | -1.792436000 |
| C | -1.562647000 | 1.048354000  | 1.638343000  | C | -1.436224000 | -0.932184000 | -2.149715000 |
| O | -2.718273000 | 1.447221000  | 1.764607000  | O | -2.579427000 | -1.044836000 | -2.589069000 |
| H | -0.775410000 | 1.487411000  | 2.295082000  | H | -0.666426000 | -1.671962000 | -2.463904000 |
| C | -1.790708000 | -0.772173000 | -0.245597000 | C | -3.058230000 | 0.957615000  | -0.126492000 |
| H | -1.441517000 | -0.547790000 | -1.259432000 | C | -4.248838000 | 0.698173000  | -0.801081000 |
| C | -3.290549000 | -0.621112000 | -0.215655000 | C | -3.052591000 | 0.944887000  | 1.267268000  |
| C | -3.918602000 | 0.209243000  | -1.137668000 | C | -5.409518000 | 0.402506000  | -0.095822000 |
| C | -4.060772000 | -1.305463000 | 0.720678000  | H | -4.256594000 | 0.703486000  | -1.883411000 |
| C | -5.298256000 | 0.380965000  | -1.108480000 | C | -4.213736000 | 0.648622000  | 1.973038000  |

|                                            |              |              |              |                                             |              |              |              |
|--------------------------------------------|--------------|--------------|--------------|---------------------------------------------|--------------|--------------|--------------|
| H                                          | -3.328444000 | 0.729557000  | -1.885452000 | H                                           | -2.130747000 | 1.156991000  | 1.794309000  |
| C                                          | -5.439199000 | -1.144250000 | 0.745781000  | C                                           | -5.395637000 | 0.373087000  | 1.294541000  |
| H                                          | -3.573524000 | -1.961489000 | 1.432196000  | H                                           | -6.328399000 | 0.199291000  | -0.634664000 |
| C                                          | -6.062183000 | -0.294863000 | -0.164638000 | H                                           | -4.193825000 | 0.637100000  | 3.057311000  |
| H                                          | -5.776152000 | 1.035190000  | -1.829049000 | H                                           | -6.301238000 | 0.143484000  | 1.844926000  |
| H                                          | -6.031223000 | -1.679949000 | 1.479615000  | C                                           | -1.789993000 | 1.266935000  | -0.905274000 |
| H                                          | -7.138688000 | -0.167764000 | -0.142515000 | H                                           | -2.090203000 | 1.756414000  | -1.844043000 |
| Product-MN-beta, EE+ ZPE= -1416.052566 a.u |              |              |              | Product-MN-alpha, EE+ ZPE= -1416.050017 a.u |              |              |              |
| C                                          | 1.002895000  | -1.307516000 | -0.374285000 | C                                           | -0.713476000 | -1.602765000 | 0.400708000  |
| N                                          | -0.355210000 | -1.783375000 | -0.634625000 | N                                           | 0.709435000  | -1.940277000 | 0.354846000  |
| C                                          | -1.251171000 | -0.677859000 | -0.358861000 | C                                           | 1.427933000  | -0.664308000 | 0.309232000  |
| C                                          | -2.700626000 | -0.998141000 | -0.084539000 | C                                           | 2.887829000  | -0.775690000 | -0.066559000 |
| C                                          | -3.494409000 | -0.371209000 | -1.045870000 | C                                           | 3.667765000  | -0.424863000 | 1.035560000  |
| C                                          | -4.876483000 | -0.429858000 | -1.011897000 | C                                           | 5.049439000  | -0.402925000 | 0.986011000  |
| C                                          | -5.465901000 | -1.143631000 | 0.030431000  | C                                           | 5.654843000  | -0.742939000 | -0.223246000 |
| C                                          | -4.692470000 | -1.761692000 | 1.007074000  | C                                           | 4.895034000  | -1.077868000 | -1.338522000 |
| C                                          | -3.300255000 | -1.681668000 | 0.957929000  | C                                           | 3.501398000  | -1.089474000 | -1.265419000 |
| C                                          | -1.353629000 | 0.159752000  | -1.669921000 | C                                           | 1.516618000  | -0.134582000 | 1.769312000  |
| H                                          | -5.478598000 | 0.065029000  | -1.763968000 | H                                           | 5.638175000  | -0.123237000 | 1.850887000  |
| H                                          | -2.704792000 | -2.149959000 | 1.732951000  | H                                           | 2.916315000  | -1.335378000 | -2.143743000 |
| C                                          | -0.522888000 | -3.072685000 | 0.031685000  | C                                           | 0.855492000  | -2.814761000 | -0.815951000 |
| H                                          | 1.343004000  | -0.746430000 | -1.242287000 | H                                           | -0.962672000 | -1.298576000 | 1.415049000  |

|   |              |              |              |   |              |              |              |
|---|--------------|--------------|--------------|---|--------------|--------------|--------------|
| H | -1.365011000 | -3.620588000 | -0.393658000 | H | 1.804692000  | -3.349810000 | -0.784099000 |
| N | -2.680400000 | 0.297534000  | -1.961072000 | N | 2.836049000  | -0.075770000 | 2.102091000  |
| H | -0.695748000 | -2.988372000 | 1.115845000  | H | 0.823761000  | -2.249490000 | -1.763251000 |
| O | -0.439077000 | 0.579496000  | -2.342153000 | O | 0.593338000  | 0.158416000  | 2.499508000  |
| H | -3.008212000 | 0.782753000  | -2.781305000 | H | 3.154506000  | 0.238685000  | 3.005293000  |
| H | -6.546631000 | -1.208452000 | 0.081312000  | H | 6.736342000  | -0.735087000 | -0.293260000 |
| H | -5.171560000 | -2.303504000 | 1.813375000  | H | 5.385756000  | -1.326648000 | -2.271500000 |
| C | 0.825042000  | -3.737550000 | -0.237644000 | C | -0.365324000 | -3.733162000 | -0.726790000 |
| C | 1.842295000  | -2.580081000 | -0.154072000 | C | -1.431562000 | -2.897764000 | 0.020449000  |
| H | 0.823915000  | -4.163797000 | -1.243052000 | H | -0.120668000 | -4.633255000 | -0.160471000 |
| H | 1.037882000  | -4.538587000 | 0.471327000  | H | -0.695848000 | -4.043518000 | -1.718828000 |
| H | 2.622257000  | -2.666185000 | -0.910814000 | H | -1.752550000 | -3.406440000 | 0.930300000  |
| H | 2.351078000  | -2.567331000 | 0.812423000  | H | -2.317166000 | -2.703146000 | -0.578995000 |
| C | -2.327430000 | 3.518030000  | 0.924972000  | C | 2.037173000  | 3.758089000  | -0.396574000 |
| C | -2.063731000 | 2.169851000  | 1.125183000  | C | 1.935125000  | 2.376219000  | -0.453853000 |
| C | -0.843303000 | 1.616538000  | 0.741152000  | C | 0.692100000  | 1.738069000  | -0.445703000 |
| C | 0.122503000  | 2.447181000  | 0.177501000  | C | -0.451062000 | 2.535666000  | -0.380009000 |
| C | -0.128885000 | 3.799812000  | -0.025640000 | C | -0.361482000 | 3.924389000  | -0.335777000 |
| C | -1.358749000 | 4.329028000  | 0.339534000  | C | 0.882324000  | 4.534377000  | -0.346075000 |
| H | -3.282229000 | 3.934521000  | 1.222617000  | H | 3.013247000  | 4.228196000  | -0.401819000 |
| H | -2.816992000 | 1.526711000  | 1.569288000  | H | 2.837054000  | 1.778581000  | -0.526152000 |
| C | -0.589036000 | 0.140626000  | 0.818241000  | C | 0.564025000  | 0.244430000  | -0.616046000 |

|   |              |              |              |   |              |              |              |
|---|--------------|--------------|--------------|---|--------------|--------------|--------------|
| H | 0.644396000  | 4.416437000  | -0.467952000 | H | -1.276444000 | 4.502615000  | -0.286804000 |
| H | -1.556320000 | 5.382567000  | 0.178290000  | H | 0.950712000  | 5.615368000  | -0.307735000 |
| C | 0.914141000  | -0.267629000 | 0.804159000  | C | -0.880023000 | -0.310191000 | -0.499856000 |
| O | 1.325283000  | 1.948275000  | -0.211917000 | O | -1.701301000 | 1.991139000  | -0.374047000 |
| H | -1.057264000 | -0.237972000 | 1.732431000  | H | 0.915443000  | 0.025928000  | -1.630833000 |
| C | 1.148490000  | -0.927698000 | 2.151290000  | C | -1.419970000 | -0.554383000 | -1.904048000 |
| O | 1.931636000  | -0.566907000 | 2.992456000  | O | -2.448185000 | -1.120153000 | -2.170475000 |
| H | 0.486892000  | -1.792962000 | 2.353041000  | H | -0.789531000 | -0.147732000 | -2.722156000 |
| C | 3.217347000  | 0.552387000  | 0.066456000  | C | -1.778376000 | 0.714079000  | 0.251441000  |
| C | 4.209333000  | 0.036926000  | 0.898865000  | H | -1.346948000 | 0.801070000  | 1.254532000  |
| C | 3.470867000  | 0.667551000  | -1.299828000 | C | -3.234884000 | 0.338367000  | 0.371375000  |
| C | 5.427279000  | -0.375790000 | 0.371044000  | C | -3.660599000 | -0.455724000 | 1.434866000  |
| H | 4.021509000  | -0.046640000 | 1.962374000  | C | -4.173577000 | 0.781793000  | -0.558445000 |
| C | 4.689819000  | 0.257297000  | -1.826242000 | C | -4.994534000 | -0.829575000 | 1.549272000  |
| H | 2.707353000  | 1.081119000  | -1.946944000 | H | -2.951576000 | -0.779001000 | 2.189098000  |
| C | 5.670441000  | -0.270662000 | -0.993662000 | C | -5.508662000 | 0.419810000  | -0.438128000 |
| H | 6.189409000  | -0.775914000 | 1.030223000  | H | -3.855427000 | 1.414591000  | -1.377234000 |
| H | 4.872837000  | 0.350703000  | -2.890806000 | C | -5.922633000 | -0.394315000 | 0.610942000  |
| H | 6.620430000  | -0.592316000 | -1.405148000 | H | -5.309055000 | -1.450173000 | 2.380532000  |
| C | 1.870328000  | 0.940564000  | 0.637690000  | H | -6.228289000 | 0.772710000  | -1.168192000 |
| H | 2.018044000  | 1.381902000  | 1.628758000  | H | -6.964638000 | -0.679131000 | 0.701926000  |

4. Molecular docking studies of **16(a-k)** and **16'(a-f)** derivatives with *E. coli* DNA gyrase (PDB ID: 1KZN)

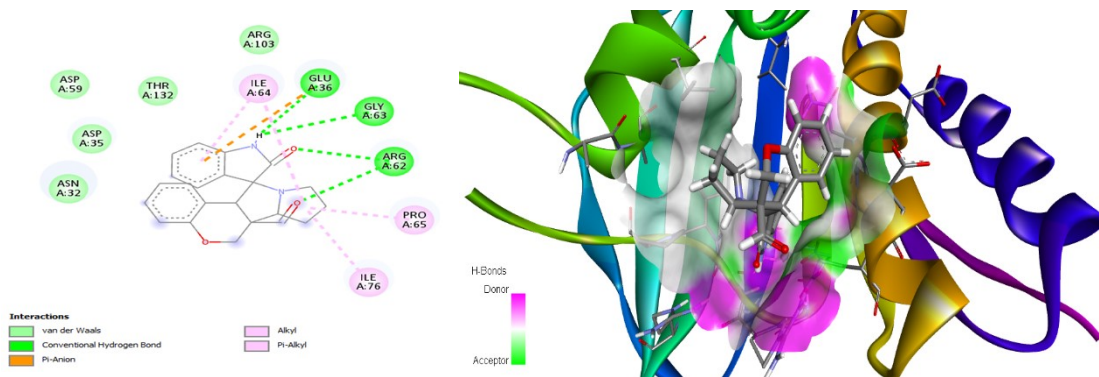

**Fig. S61.** Docking interaction and 3D binding image of compound **16a** with *E. coli* DNA gyrase (PDB ID: 1KZN)

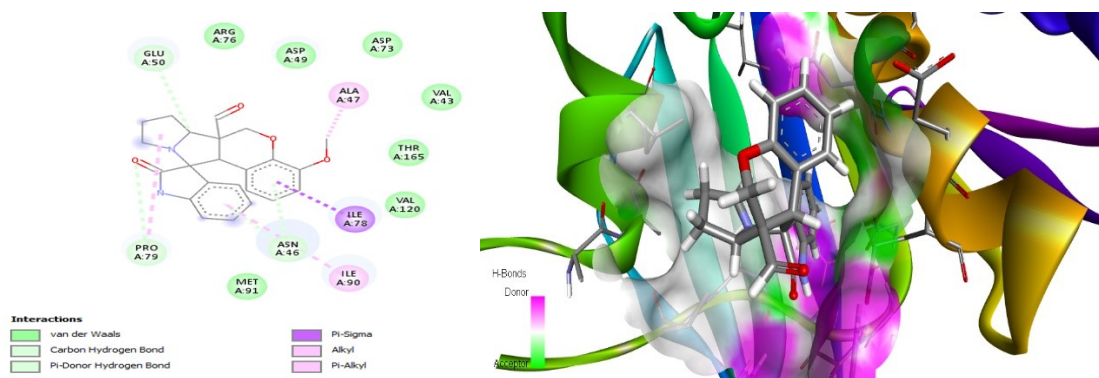

**Fig. S62.** Docking interaction and 3D binding image of compound **16b** with *E. coli* DNA gyrase (PDB ID: 1KZN)

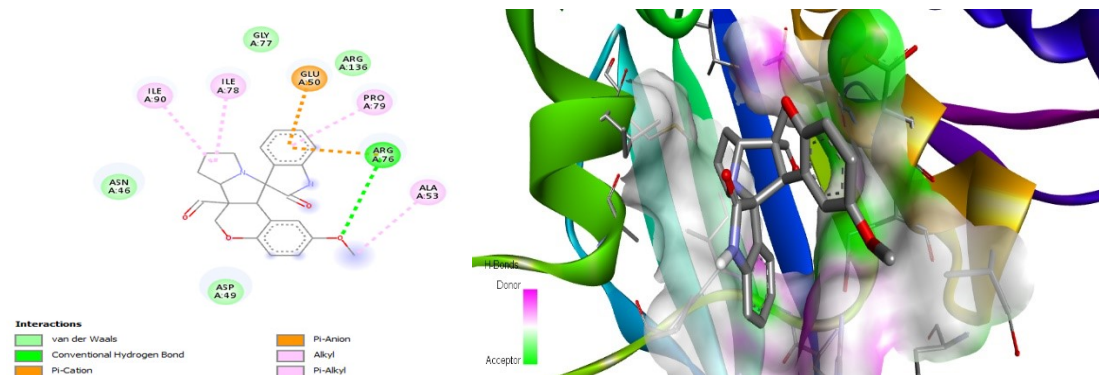

**Fig. S63.** Docking interaction and 3D binding image of compound 16c with *E. coli* DNA gyrase (PDB ID: 1KZN)

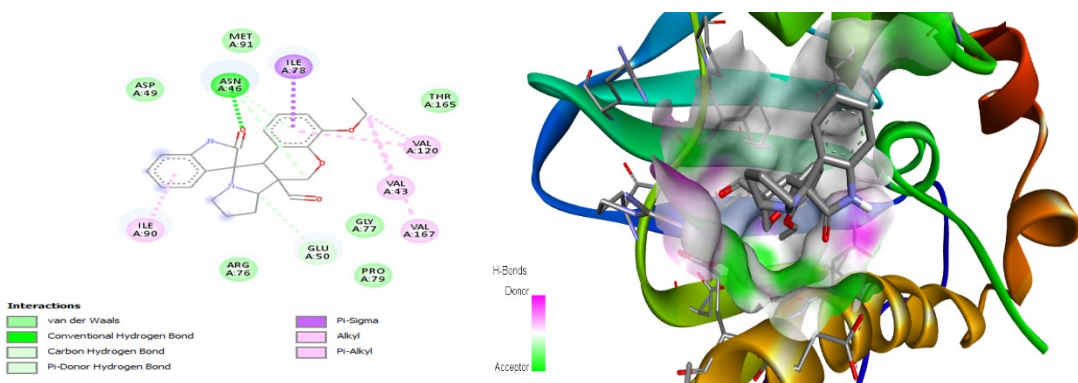

**Fig. S64.** Docking interaction and 3D binding image of compound 16d with *E. coli* DNA gyrase (PDB ID: 1KZN)

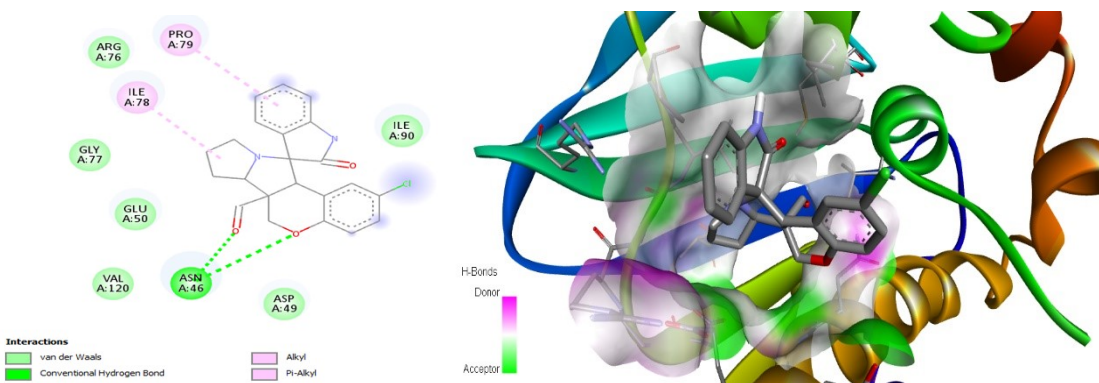



**Fig. S65.** Docking interaction and 3D binding image of compound **16e** with *E. coli* DNA gyrase (PDB ID: 1KZN)

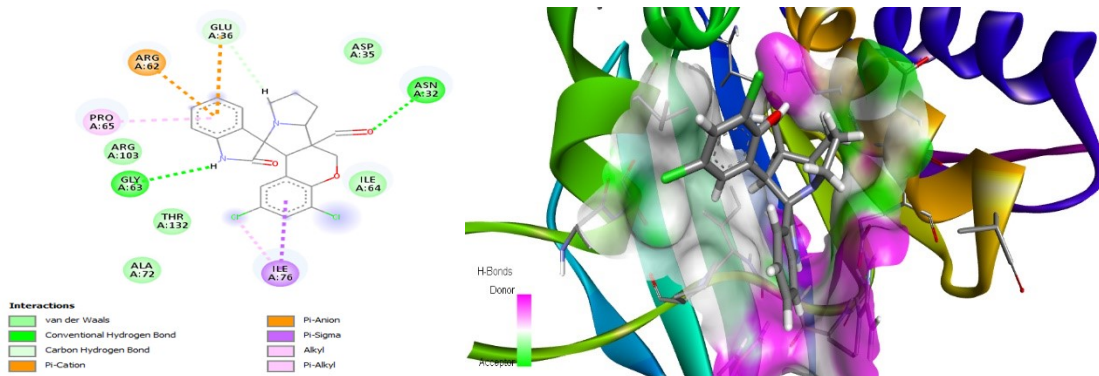

**Fig. S66.** Docking interaction and 3D binding image of compound **16f** with *E. coli* DNA gyrase (PDB ID: 1KZN)

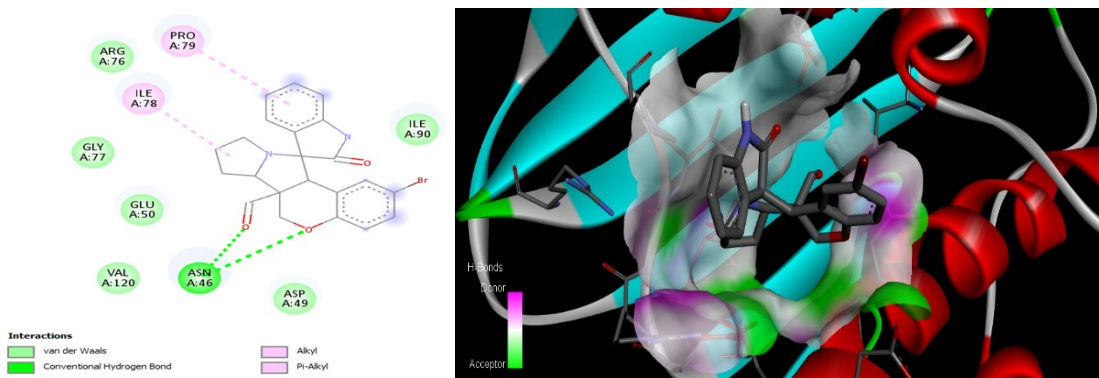

**Fig. S67.** Docking interaction and 3D binding image of compound **16g** with *E. coli* DNA gyrase (PDB ID: 1KZN)

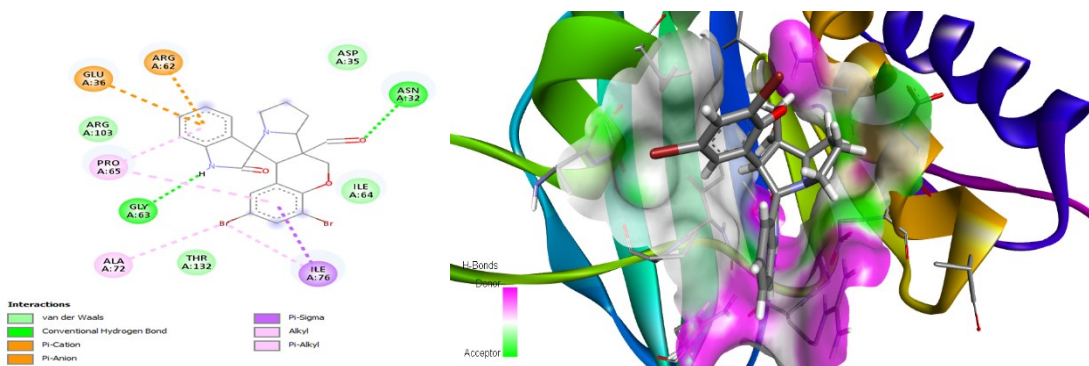

**Fig. S68.** Docking interaction and 3D binding image of compound **16h** with *E. coli* DNA gyrase (PDB ID: 1KZN)

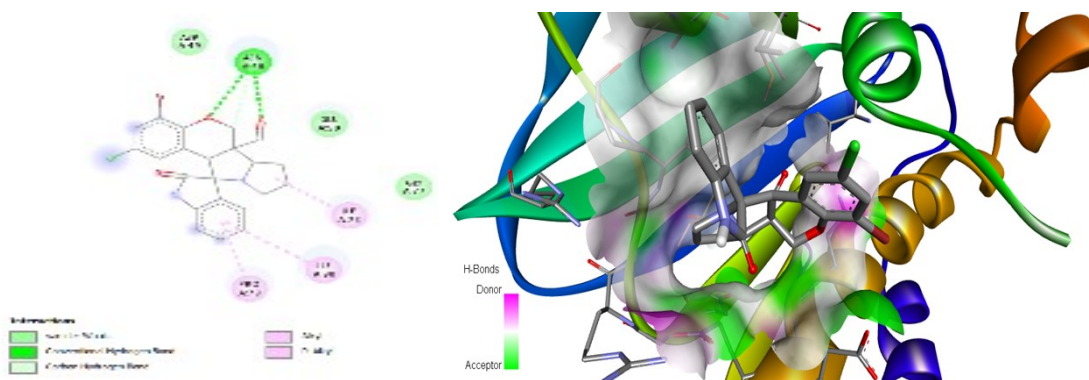

**Fig. S69.** Docking interaction and 3D binding image of compound **16i** with *E. coli* DNA gyrase (PDB ID: 1KZN)

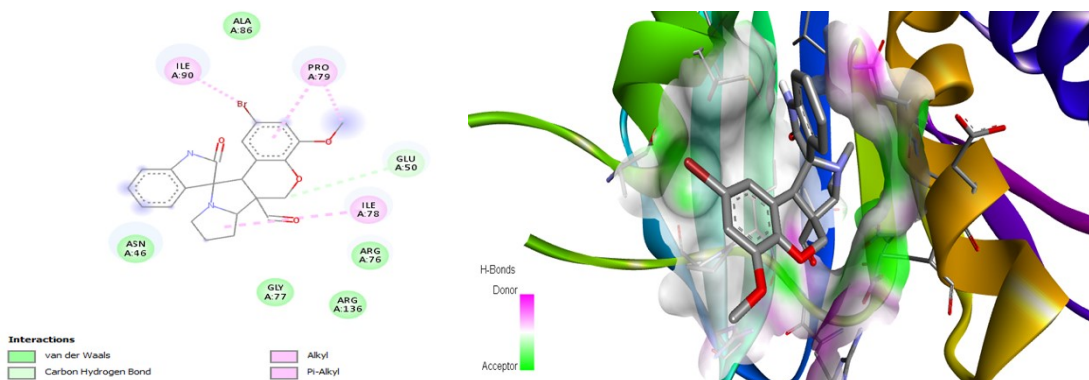

Fig. S70. Docking interaction and 3D binding image of compound **16j** with *E. coli* DNA gyrase (PDB ID: 1KZN)

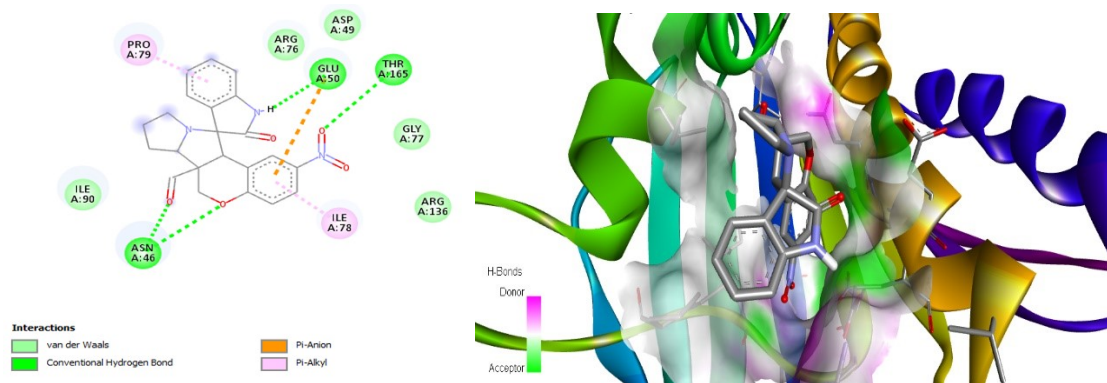

Fig. S71. Docking interaction and 3D binding image of compound **16k** with *E. coli* DNA gyrase (PDB ID: 1KZN)

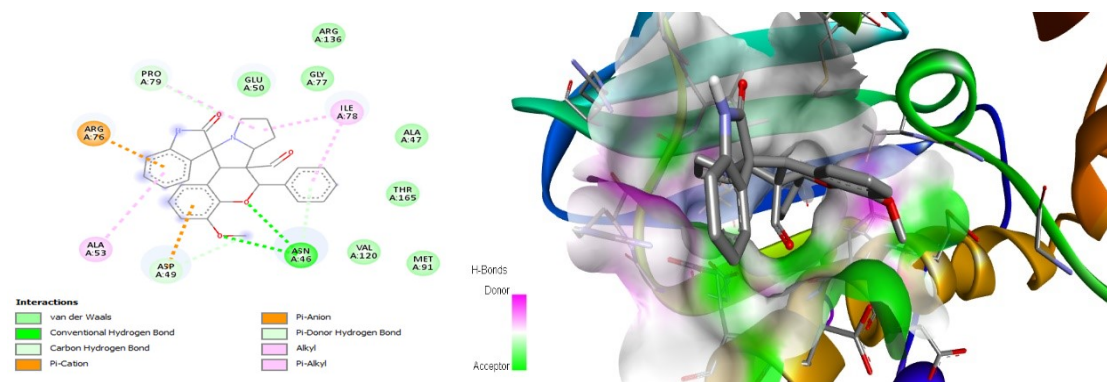

Fig. S72. Docking interaction and 3D binding image of compound **16'a** with *E. coli* DNA gyrase (PDB ID: 1KZN)

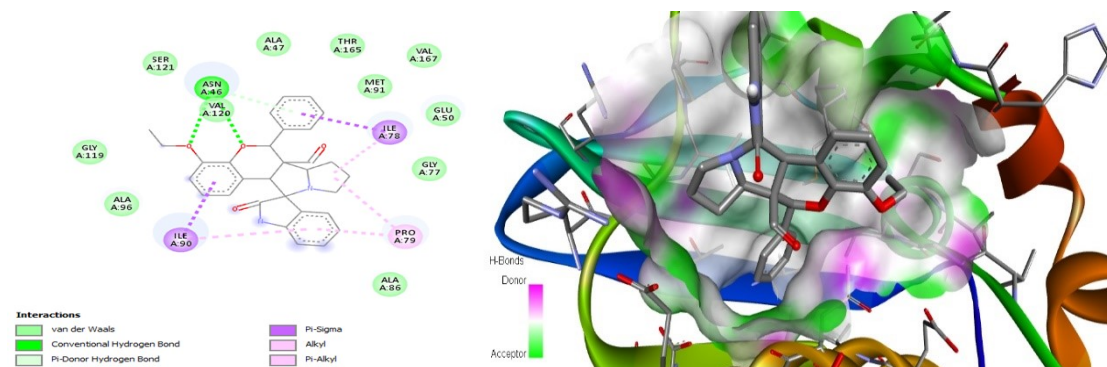

**Fig. S73.** Docking interaction and 3D binding image of compound **16'b** with *E. coli* DNA gyrase (PDB ID: 1KZN)

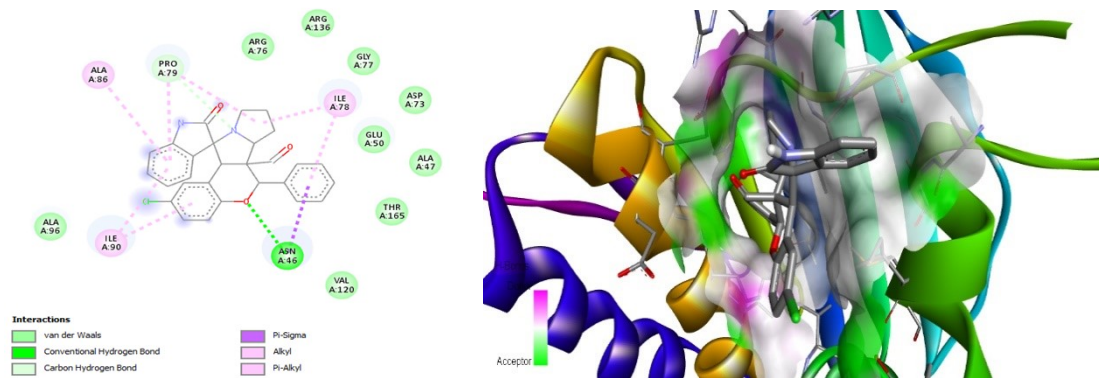

**Fig. S74.** Docking interaction and 3D binding image of compound **16'c** with *E. coli* DNA gyrase (PDB ID: 1KZN)

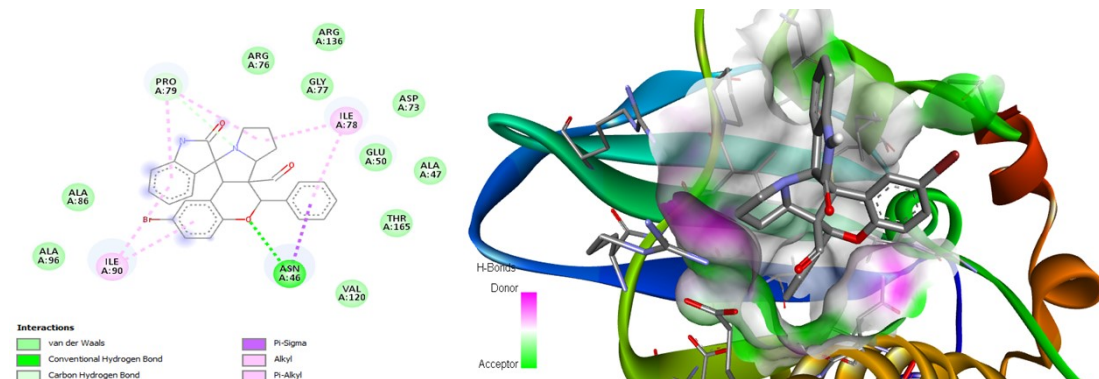

**Fig. S75.** Docking interaction and 3D binding image of compound **16'd** with *E. coli* DNA gyrase (PDB ID: 1KZN)

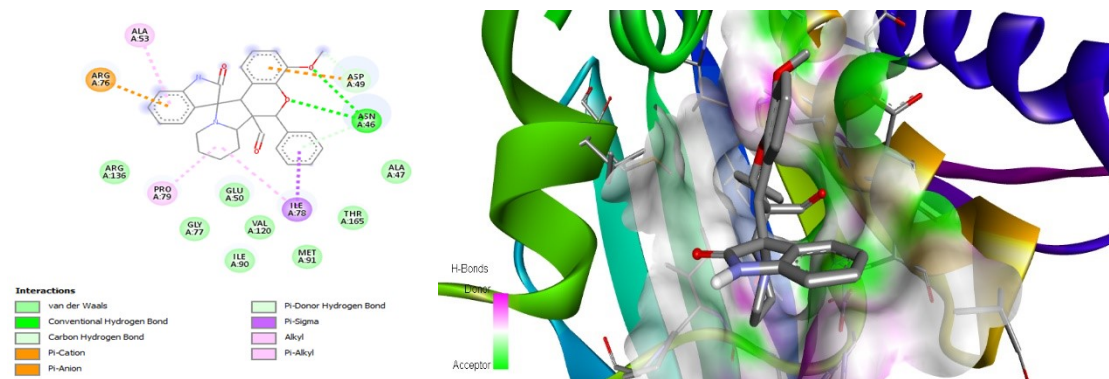

**Fig. S76.** Docking interaction and 3D binding image of compound **16'e** with *E. coli* DNA gyrase (PDB ID: 1KZN)

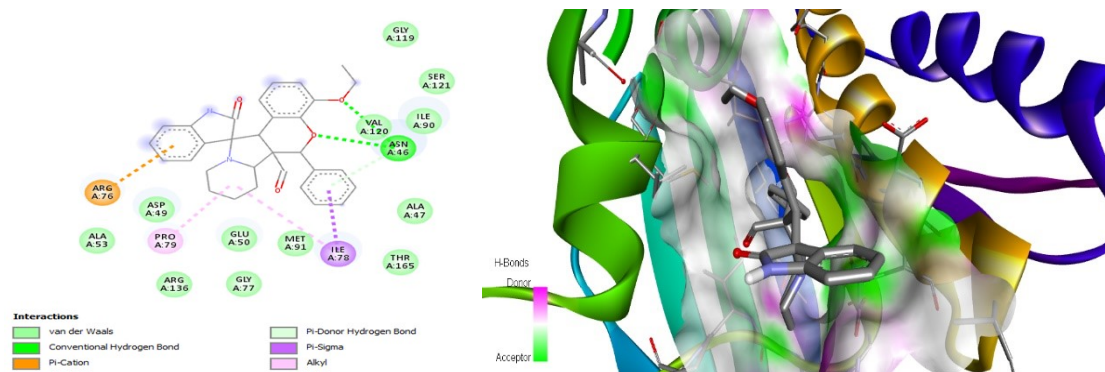

**Fig. S77.** Docking interaction and 3D binding image of compound **16'f** with *E. coli* DNA gyrase (PDB ID: 1KZN)

**5. Molecular docking studies of **16(a-k)** and **16'(a-f)** derivatives with *S. aureus* DNA gyrase (PDB ID: 3G7B)**

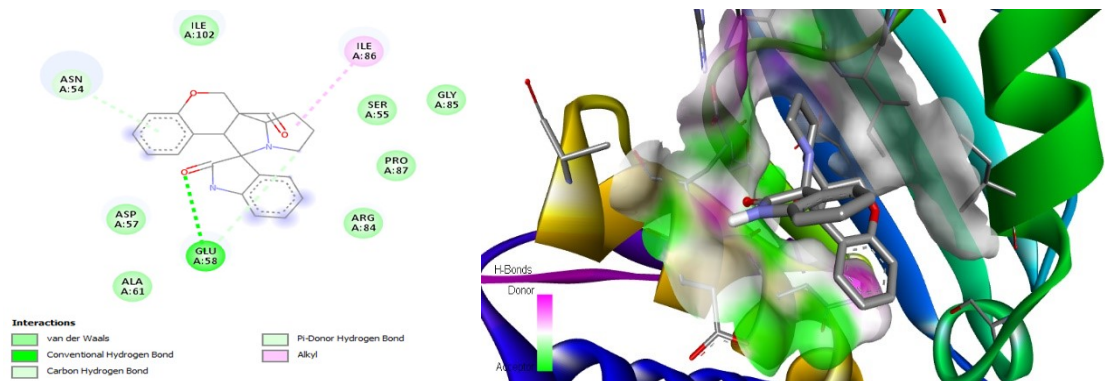

**Fig. S78.** Docking interaction and 3D binding image of compound **16a** with *S. aureus* DNA gyrase (PDB ID: 3G7B)

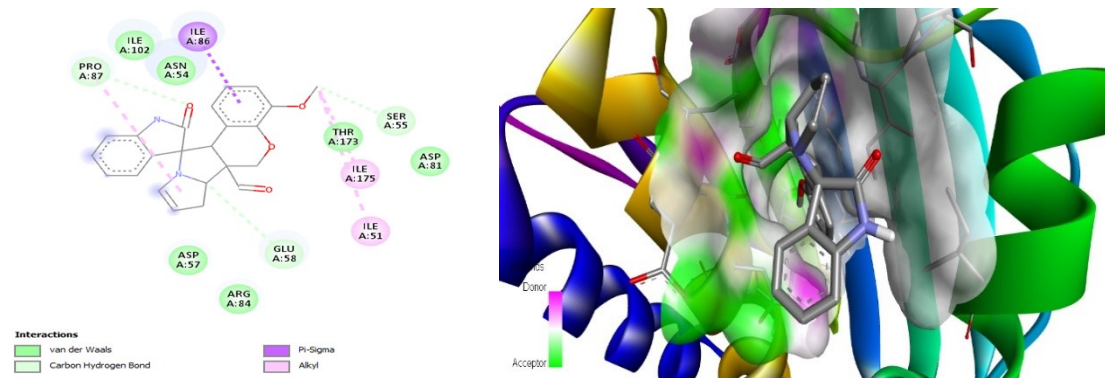

**Fig. S79.** Docking interaction and 3D binding image of compound **16b** with *S. aureus* DNA gyrase (PDB ID: 3G7B)

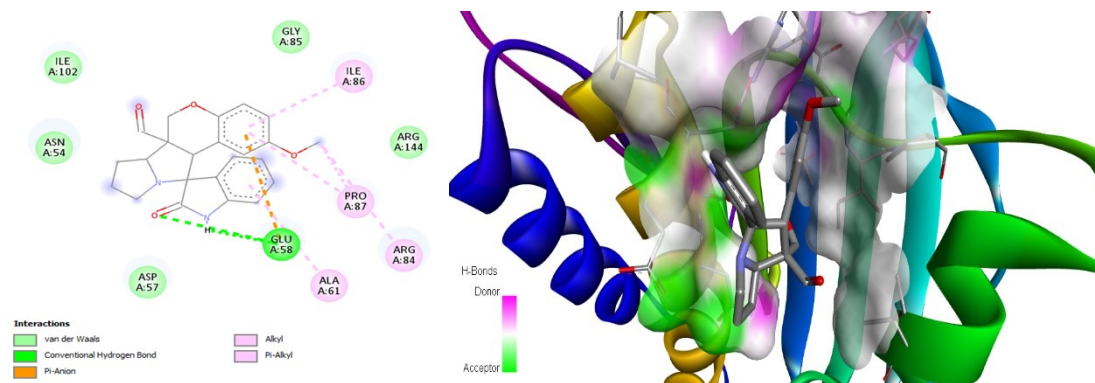

**Fig. S80.** Docking interaction and 3D binding image of compound **16c** with *S. aureus* DNA gyrase (PDB ID: 3G7B)

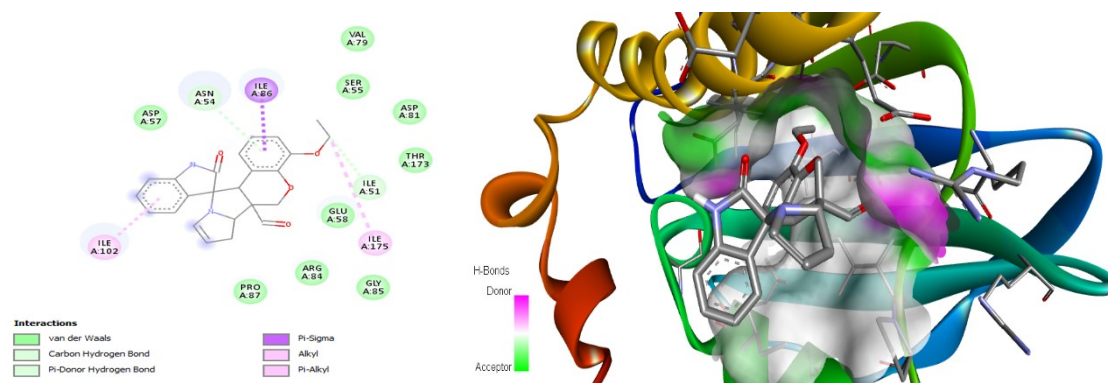

**Fig. S81.** Docking interaction and 3D binding image of compound **16d** with *S. aureus* DNA gyrase (PDB ID: 3G7B)

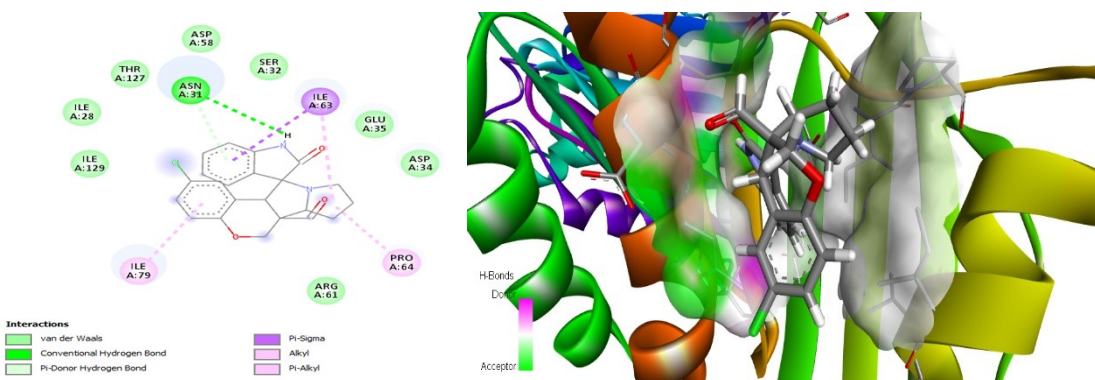

**Fig. S82.** Docking interaction and 3D binding image of compound **16e** with *S. aureus* DNA gyrase (PDB ID: 3G7B)

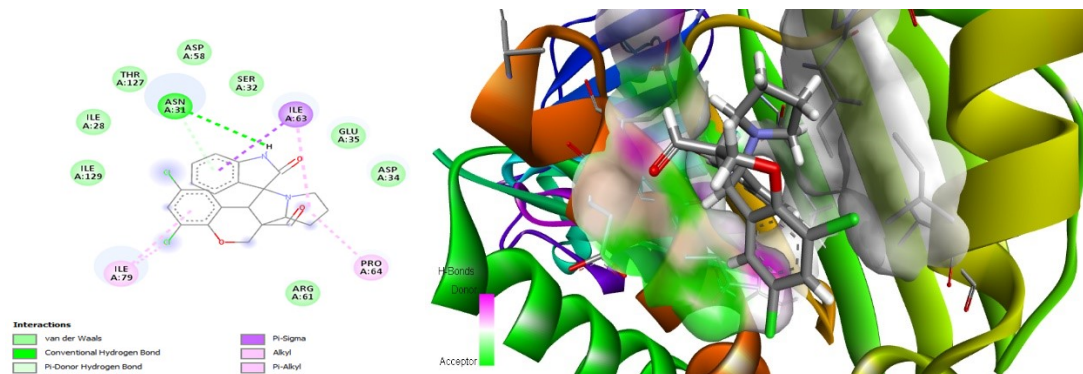

**Fig. S83.** Docking interaction and 3D binding image of compound **16f** with *S. aureus* DNA gyrase (PDB ID: 3G7B)

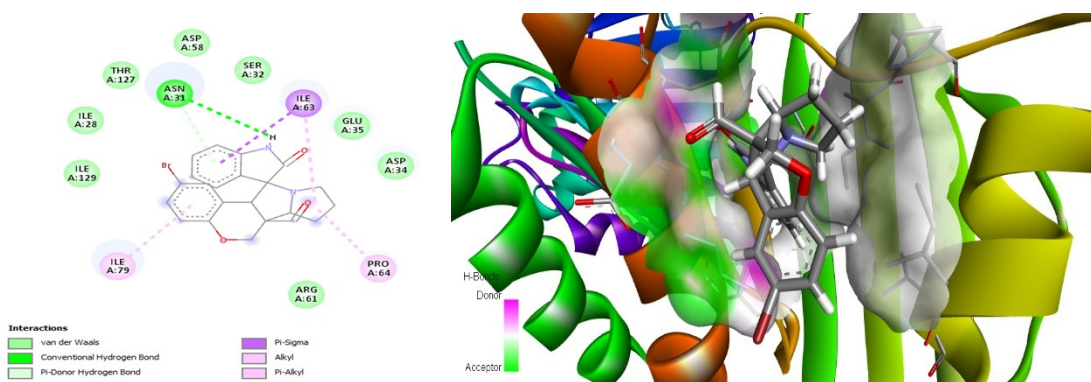

**Fig. S84.** Docking interaction and 3D binding image of compound **16g** with *S. aureus* DNA gyrase (PDB ID: 3G7B)

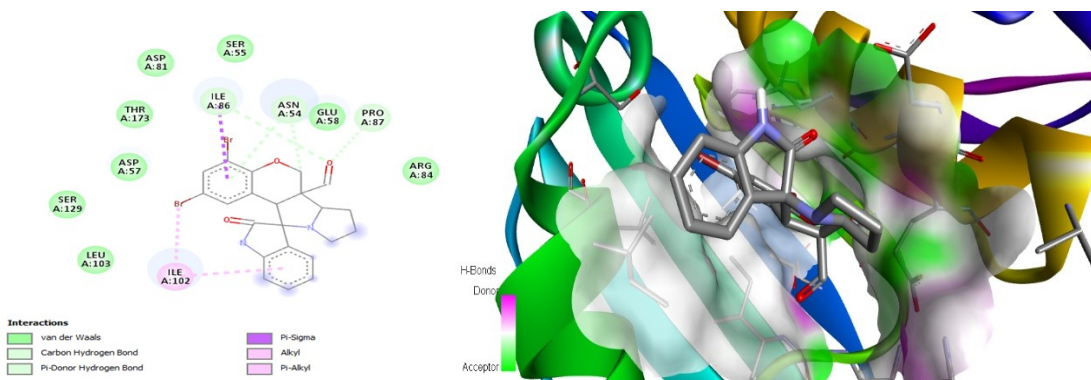

**Fig. S85.** Docking interaction and 3D binding image of compound **16h** with *S. aureus DNA gyrase* (PDB ID: 3G7B)

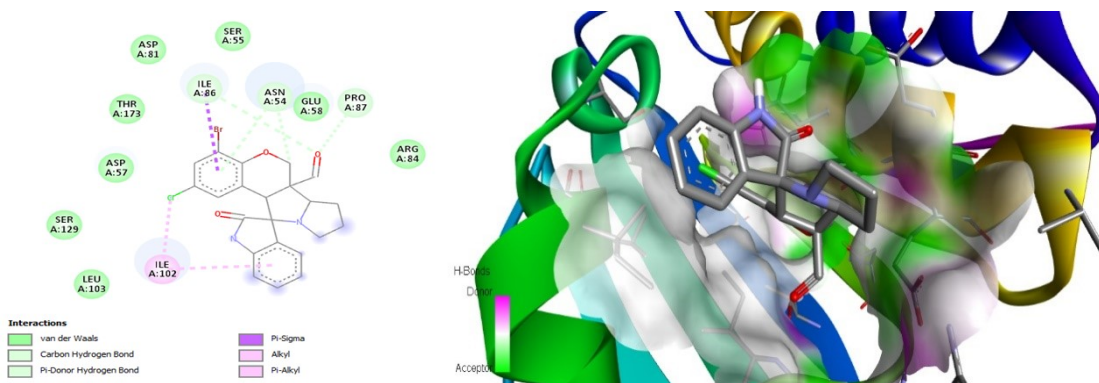

**Fig. S86.** Docking interaction and 3D binding image of compound **16i** with *S. aureus DNA gyrase* (PDB ID: 3G7B)

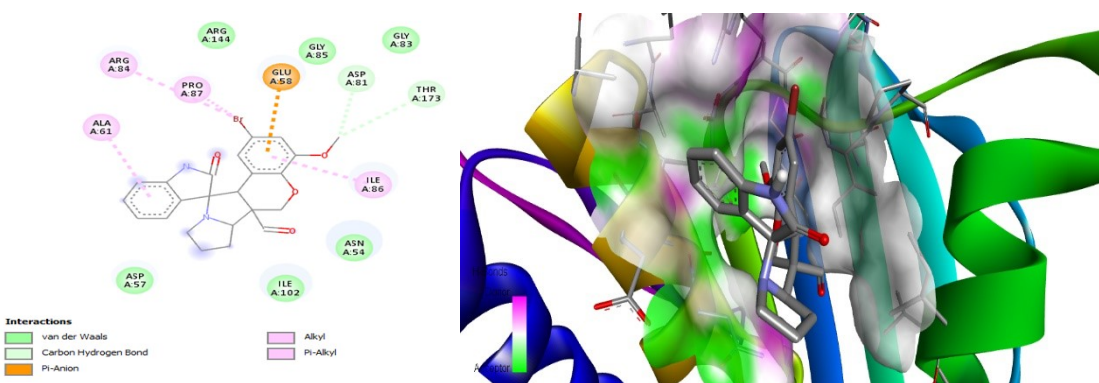

**Fig. S87.** Docking interaction and 3D binding image of compound **16j** with *S. aureus DNA gyrase* (PDB ID: 3G7B)

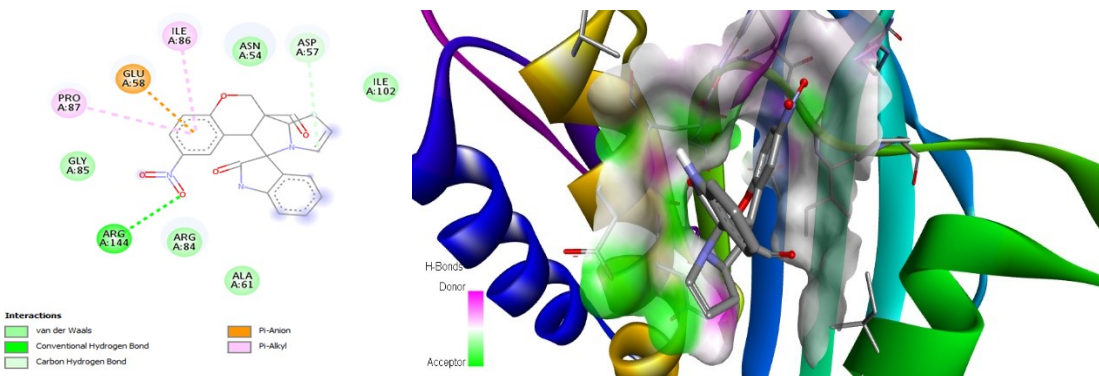



**Fig. S88.** Docking interaction and 3D binding image of compound **16k** with *S. aureus* DNA gyrase (PDB ID: 3G7B)

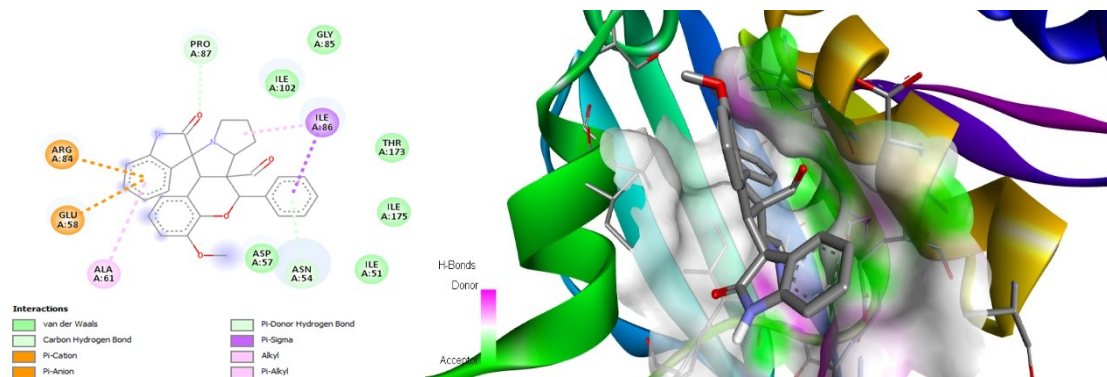

**Fig. S89.** Docking interaction and 3D binding image of compound **16'a** with *S. aureus* DNA gyrase (PDB ID: 3G7B)

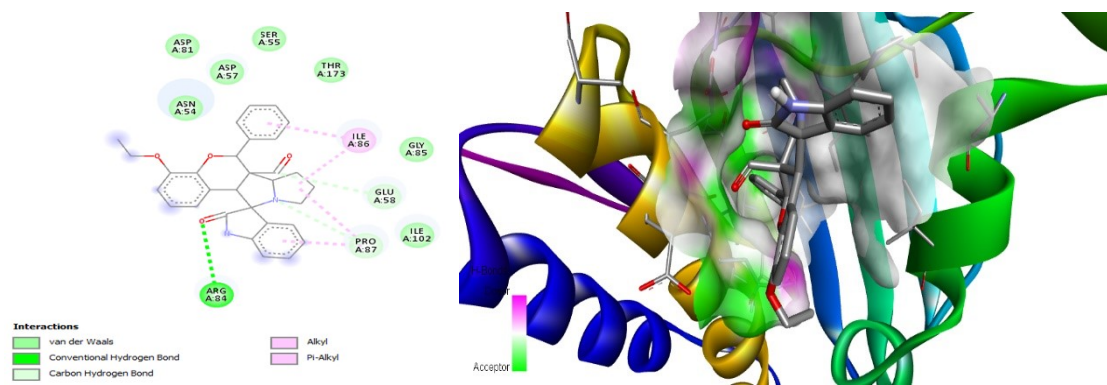

**Fig. S90.** Docking interaction and 3D binding image of compound **16'b** with *S. aureus* DNA gyrase (PDB ID: 3G7B)

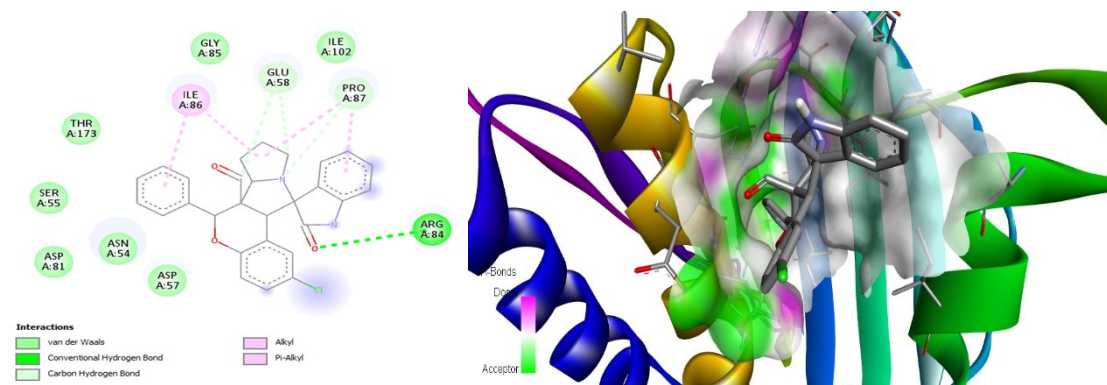

**Fig. S91.** Docking interaction and 3D binding image of compound **16'c** with *S. aureus* DNA gyrase (PDB ID: 3G7B)

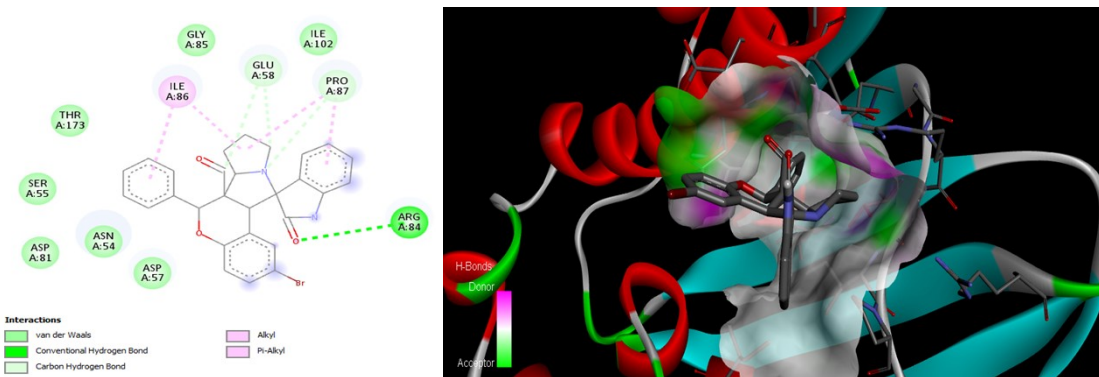

**Fig. S92.** Docking interaction and 3D binding image of compound **16'd** with *S. aureus* DNA gyrase (PDB ID: 3G7B)

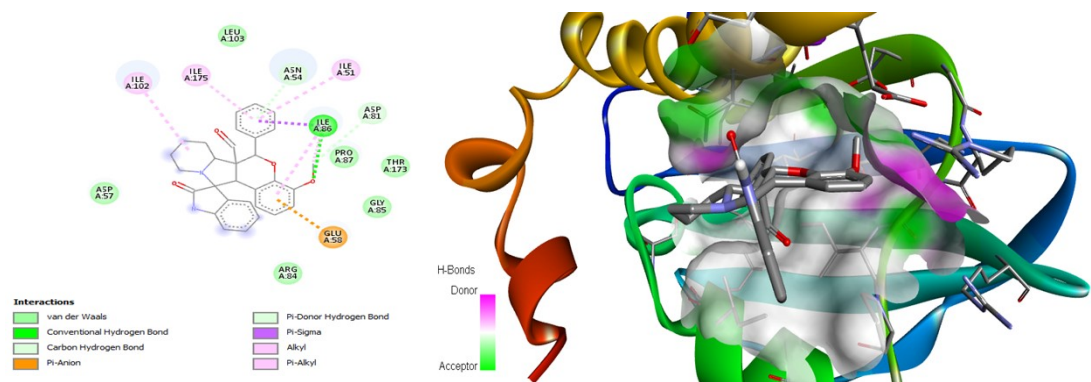

**Fig. S93.** Docking interaction and 3D binding image of compound **16'e** with *S. aureus* DNA gyrase (PDB ID: 3G7B)

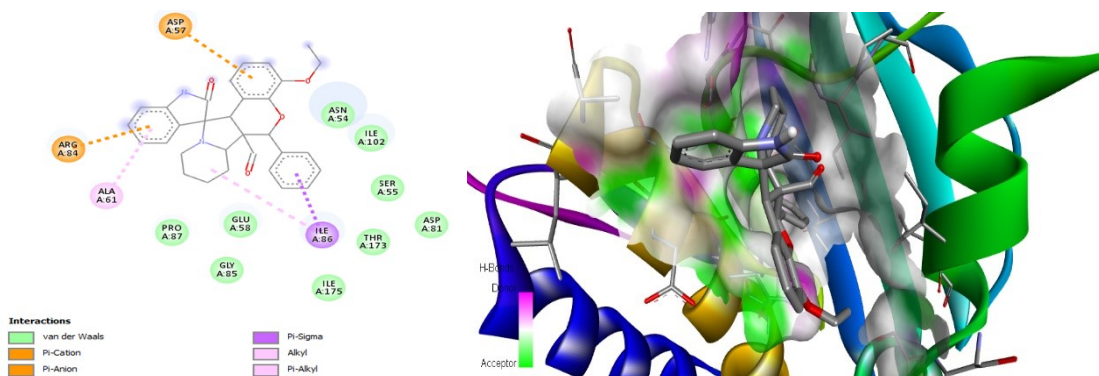

**Fig. S94.** Docking interaction and 3D binding image of compound **16'f** with *S. aureus* DNA gyrase (PDB ID: 3G7B)

**6.** Bioavailability radar plots of Ciprofloxacin and **16(a-k)** and **16'(a-f)** derivatives

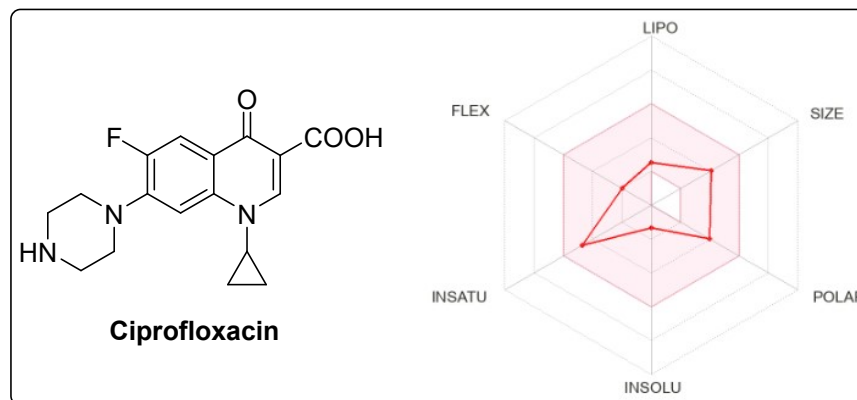

**Fig S95.** Bioavailability radar plot of Ciprofloxacin

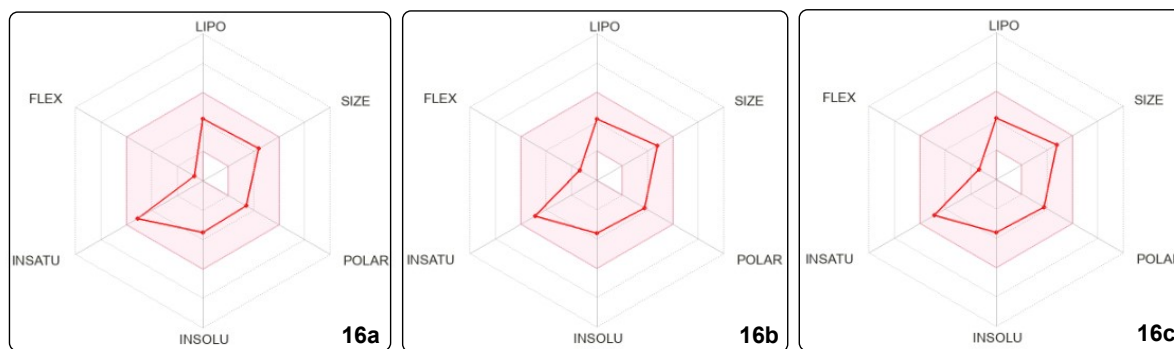

**Fig S96.** Bioavailability radar plot of **16(a-c)**

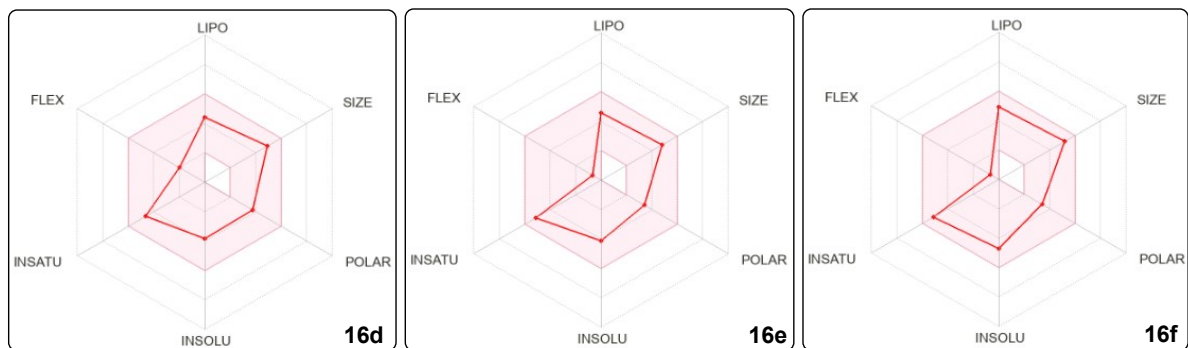

**Fig S97.** Bioavailability radar plot of **16(d-f)**

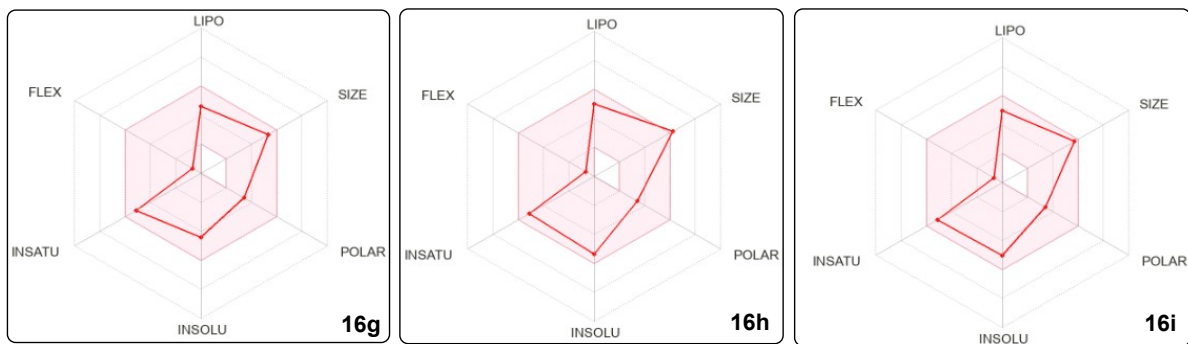

**Fig S98.** Bioavailability radar plot of **16(g-i)**

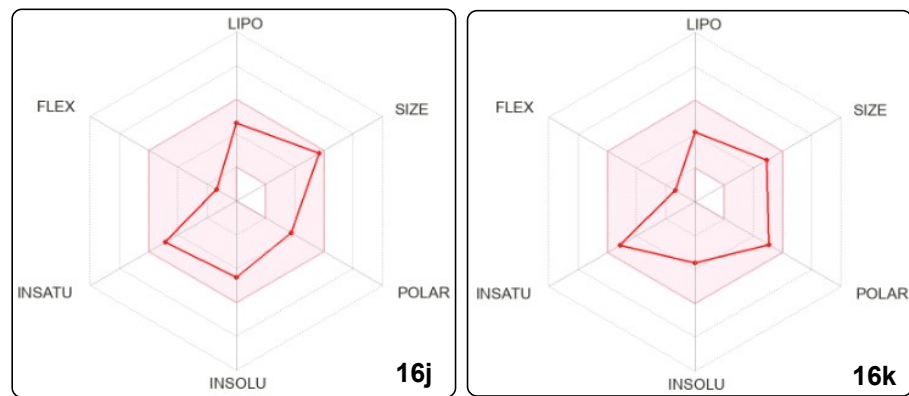

**Fig S99.** Bioavailability radar plot of **16(j-k)**

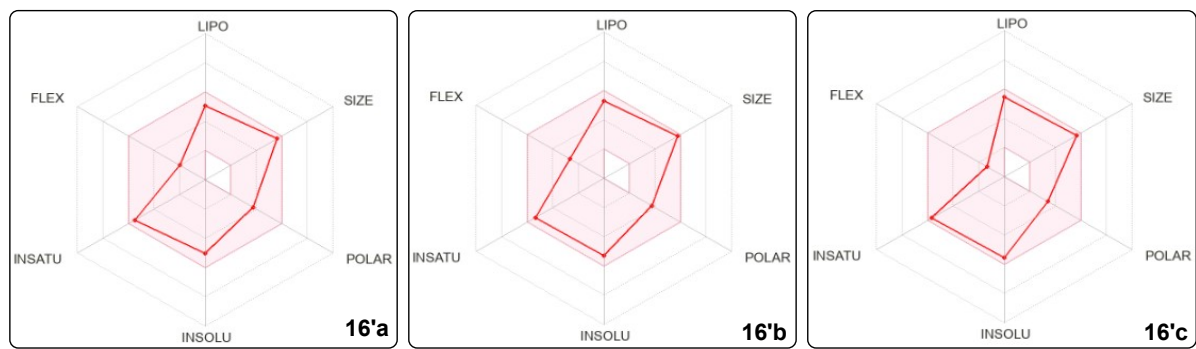

**Fig S100.** Bioavailability radar plot of **16'(a-c)**

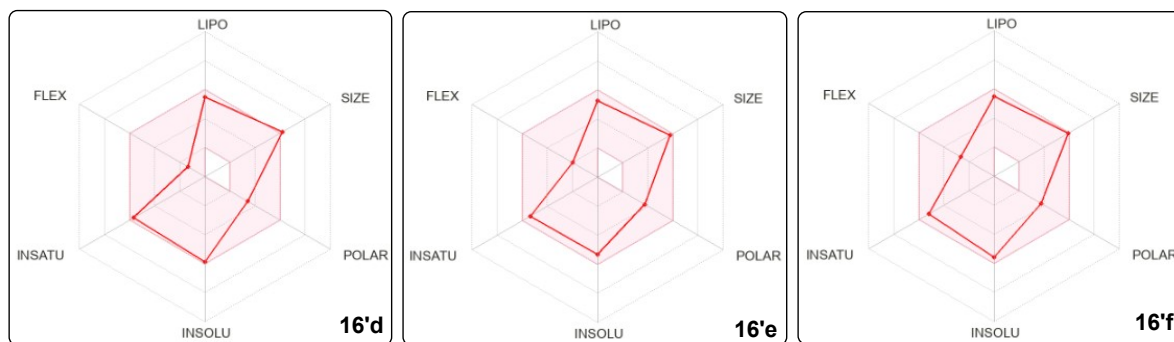

**Fig S101.** Bioavailability radar plot of 16'(d-f)

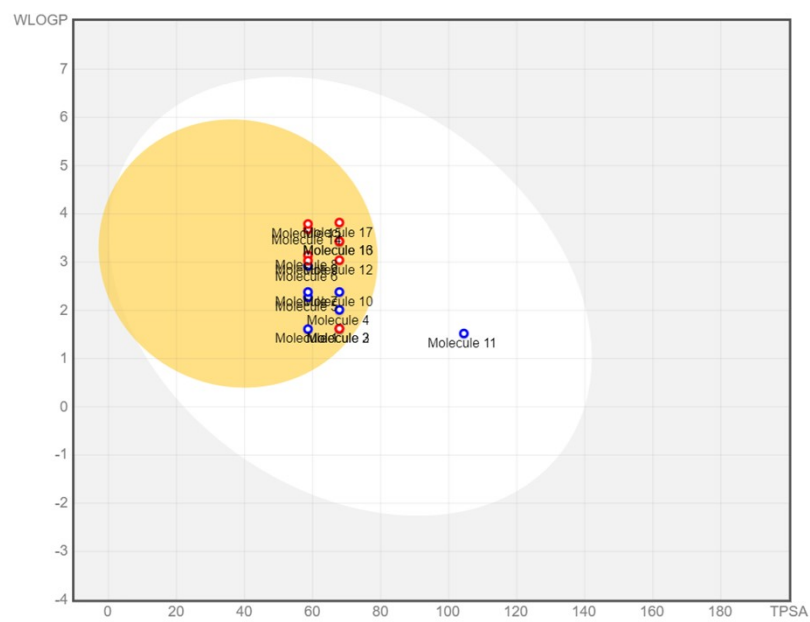

**Fig S102.** Plot of TPSA with WLOGP

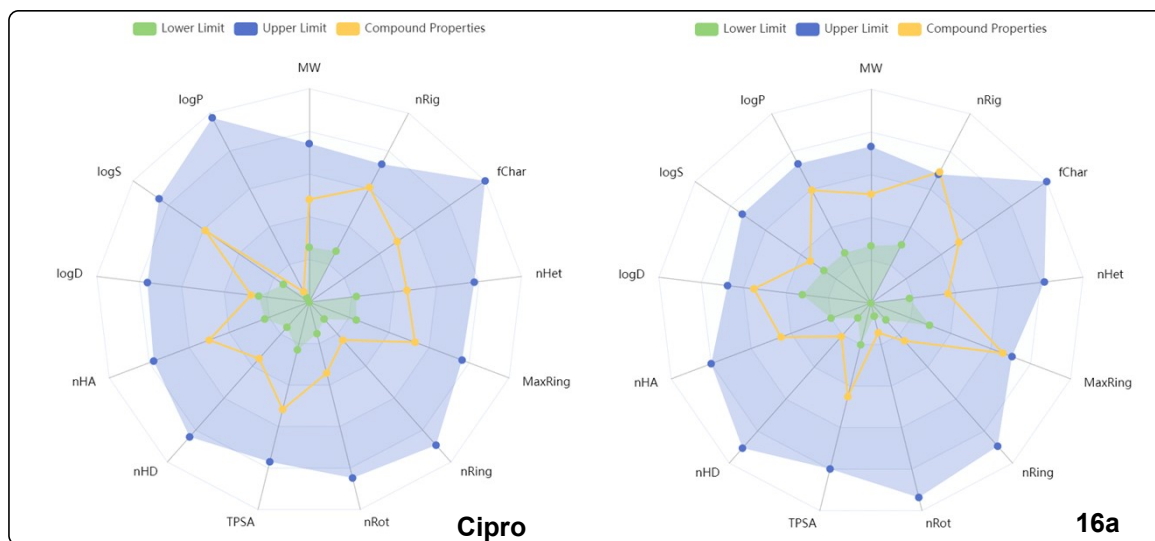

**Fig. 103.** Radar chart of the physicochemical properties of Ciprofloxacin and **16a** showing the *in-silico* measurements of the descriptors MW, nRig, fChar, nHet, MaxRig, nRing, nRot, TPSA, nHD, nHA, LogD, LogS, LogP.
